# Supplementary material for: Decreased Suppression and Increased Phosphorylated STAT3 in Regulatory T Cells are Associated with Benefit from Adjuvant PD-1 Blockade in Resected Metastatic Melanoma
Source: Oxford University Press journal article supplement (doi:10.1158/1078-0432.ccr-18-1100), 2018-08-21
Supplement: 10780432ccr181100-sup-199900_2_supp_4920235_pch87r.xlsx [file 10780432ccr181100-sup-199900_2_supp_4920235_pch87r.xlsx]

## Sheet: NED_Treg_PreVsPost
test_id	gene_id	gene	RefGene_name2	Gene	locus	sample_1	sample_2	status	value_1	value_2	log2(fold_change)	test_stat	p_value	q_value	significant
XLOC_220848	XLOC_220848	NM_001261427,NM_001261428,NM_001261429,NM_145693	,,,LPIN1	LPIN1	2:11817704-11967535	PRE	POST	OK	26.7098	8.43998	-1.66206	-2.95656	0.00015	0.00175882	yes
XLOC_002420	XLOC_002420	NM_001270439,NM_005717	,ARPC5	ARPC5	1:183595327-183605076	PRE	POST	OK	58.1656	78.6431	0.435153	0.864173	0.0227	0.0271627	yes
XLOC_293921	XLOC_293921	NM_001258315,NM_001258316,NM_018098	,,ECT2	ECT2	3:172468474-172546559	PRE	POST	OK	2.36783	3.90226	0.720745	0.890415	0.0237	0.0283558	yes
XLOC_506910	XLOC_506910	NM_001267571,NM_001267572,NM_018421	,,TBC1D2	TBC1D2	9:100961279-101018003	PRE	POST	OK	1.08388	2.21684	1.0323	0.881484	0.0212	0.0253717	yes
XLOC_065912	XLOC_065912	NM_000920,NM_001040716,NM_022172	PC,PC,PC	PC	11:66615996-66725847	PRE	POST	OK	0.426447	1.85762	2.12302	0.95314	0.02845	0.0340238	yes
XLOC_529650	XLOC_529650	NM_004182,NM_153477	UXT,UXT	UXT	X:47510526-47519776	PRE	POST	OK	361.499	238.023	-0.602892	-1.07292	0.00625	0.00751983	yes
XLOC_294277	XLOC_294277	NM_001064,NM_001135055,NM_001258028	TKT,TKT,	TKT	3:53258722-53290130	PRE	POST	OK	40.2948	54.445	0.434207	0.879497	0.0212	0.0253717	yes
XLOC_413866	XLOC_413866	NM_001134709,NM_003472	DEK,DEK	DEK	6:18155618-18264799	PRE	POST	OK	101.215	141.66	0.485011	0.925512	0.01775	0.0212507	yes
XLOC_185423	XLOC_185423	NM_001002032,NM_001002033,NM_016185	HN1,HN1,HN1	HN1	17:73131304-73150775	PRE	POST	OK	17.5518	24.7542	0.496055	0.806611	0.0286	0.0342028	yes
XLOC_211122	XLOC_211122	NM_001728,NM_198589,NM_198590,NM_198591	BSG,BSG,,BSG	BSG	19:562615-583496	PRE	POST	OK	32.8905	46.476	0.498817	0.93629	0.0169	0.020235	yes
XLOC_002580	XLOC_002580	NM_002296,NM_194442	LBR,LBR	LBR	1:225588582-225616557	PRE	POST	OK	15.592	23.9551	0.619524	1.09252	0.0046	0.00556868	yes
XLOC_091517	XLOC_091517	NM_001206999,NM_007174	CIT,CIT	CIT	12:120123594-120315095	PRE	POST	OK	1.17952	1.9937	0.757249	0.643592	0.0205	0.024536	yes
XLOC_185499	XLOC_185499	NM_001080395,NM_004920	AATK,AATK	AATK	17:79008946-79156964	PRE	POST	OK	12.9004	0.0653822	-7.6243	-0.910584	0.0065	0.00781909	yes
XLOC_506863	XLOC_506863	NM_001197295,NM_001197296,NM_001393	ECM2,ECM2,ECM2	ECM2	9:95059639-95432547	PRE	POST	OK	6.3834	0.0431485	-7.20887	-0.567455	0.0004	0.00175882	yes
XLOC_293429	XLOC_293429	NM_001164680,NM_001837,NM_178328,NM_178329	CCR3,CCR3,CCR3,CCR3	CCR3	3:46283570-46308230	PRE	POST	OK	326.298	2.37241	-7.10369	-7.55978	5e-05	0.00175882	yes
XLOC_477059	XLOC_477059	NM_001164271,NM_006094,NM_024767,NM_182643	DLC1,DLC1,DLC1,DLC1	DLC1	8:12940871-13372429	PRE	POST	OK	1.1438	0.0461861	-4.63023	-0.792518	0.0223	0.0266852	yes
XLOC_374126	XLOC_374126	NM_001131055,NM_022304	HRH2,HRH2	HRH2	5:175085038-175118330	PRE	POST	OK	12.0115	3.54362	-1.76113	-1.03909	0.02055	0.0245958	yes
XLOC_157148	XLOC_157148	NM_032907,NM_201265	UBL7,UBL7	UBL7	15:74738314-74753529	PRE	POST	OK	55.2028	23.0791	-1.25815	-2.58065	5e-05	0.00175882	yes
XLOC_001154	XLOC_001154	NM_001167738,NM_020443	NAV1,NAV1	NAV1	1:201617449-201797801	PRE	POST	OK	0.866134	0.420955	-1.04092	-0.754668	0.01315	0.0157552	yes
XLOC_530041	XLOC_530041	NM_001166460,NM_001166461,NM_001166462,NM_002436	MPP1,MPP1,MPP1,MPP1	MPP1	X:154006958-154033802	PRE	POST	OK	4.17251	2.28098	-0.871264	-0.877701	0.0295	0.0352773	yes
XLOC_506492	XLOC_506492	NM_005157,NM_007313	ABL1,ABL1	ABL1	9:133589267-133763062	PRE	POST	OK	7.44996	4.1577	-0.841448	-1.00424	0.02765	0.0330696	yes
XLOC_413300	XLOC_413300	NM_001166538,NM_007161,NM_205837,NM_205838,NM_205839,NM_205840	LST1,LST1,LST1,LST1,LST1,LST1	LST1	6:31550328-31560762	PRE	POST	OK	24.1291	13.9974	-0.785617	-0.938418	0.0311	0.0371855	yes
XLOC_331577	XLOC_331577	NM_001128174,NM_003360	UGT8,UGT8	UGT8	4:115519610-115598202	PRE	POST	OK	8.27408	4.91643	-0.750988	-0.861496	0.02075	0.0248345	yes
XLOC_065218	XLOC_065218	NM_001005,NM_001256802,NM_001260506,NM_001260507	RPS3,RPS3,,	RPS3	11:75110534-75141674	PRE	POST	OK	813.95	523.705	-0.636185	-0.850188	0.02665	0.0318773	yes
XLOC_331655	XLOC_331655	NM_001153446,NM_001153484,NM_001153552,NM_001153585,NM_001153635,NM_001153663,NM_001153690,NM_032547	SCOC,SCOC,SCOC,SCOC,SCOC,SCOC,SCOC,SCOC	SCOC	4:141178439-141303710	PRE	POST	OK	18.0572	12.3678	-0.545981	-0.783178	0.0407	0.0486222	yes
XLOC_002284	XLOC_002284	NM_001256030,NM_001778	CD48,CD48	CD48	1:160648535-160681641	PRE	POST	OK	521.945	379.107	-0.461294	-0.777602	0.0336	0.0401647	yes
XLOC_000384	XLOC_000384	NM_001195193,NM_002482,NM_152298	NASP,NASP,NASP	NASP	1:46049425-46089731	PRE	POST	OK	39.6025	53.7184	0.439825	0.840139	0.0313	0.0374239	yes
XLOC_211139	XLOC_211139	NM_004368,NM_201277	CNN2,CNN2	CNN2	19:1026297-1039064	PRE	POST	OK	75.3904	102.275	0.440005	0.881009	0.02065	0.0247152	yes
XLOC_293898	XLOC_293898	NM_001002800,NM_005496	SMC4,SMC4	SMC4	3:160117429-160152756	PRE	POST	OK	33.7506	46.3734	0.458384	0.87694	0.03065	0.0366493	yes
XLOC_000473	XLOC_000473	NM_001017415,NM_001017416,NM_003368	USP1,USP1,USP1	USP1	1:62901974-62917479	PRE	POST	OK	18.2288	25.1295	0.463158	0.918859	0.02135	0.025551	yes
XLOC_211714	XLOC_211714	NM_001145713,NM_001145714,NM_005500	SAE1,SAE1,SAE1	SAE1	19:47634079-47713893	PRE	POST	OK	13.871	20.1451	0.538363	0.814562	0.03655	0.0436807	yes
XLOC_138239	XLOC_138239	NM_001014431,NM_001014432,NM_005163	AKT1,AKT1,AKT1	AKT1	14:105235686-105262080	PRE	POST	OK	14.1562	20.6153	0.542286	0.932061	0.01535	0.0183827	yes
XLOC_090340	XLOC_090340	NM_001159287,NM_001258026	TPI1,	TPI1	12:6976583-6982521	PRE	POST	OK	50.4442	73.7506	0.547966	1.00848	0.008	0.00959832	yes
XLOC_041315	XLOC_041315	NM_001047160,NM_005863	NET1,NET1	NET1	10:5454513-5501019	PRE	POST	OK	4.38404	6.44557	0.556047	0.821063	0.02455	0.0293711	yes
XLOC_091261	XLOC_091261	NM_001127321,NM_001127322,NM_012117	CBX5,CBX5,CBX5	CBX5	12:54624730-54673915	PRE	POST	OK	5.58899	8.35426	0.579924	0.970462	0.00765	0.00918042	yes
XLOC_287976	XLOC_287976	NM_000714,NM_001256530,NM_001256531	TSPO,TSPO,TSPO	TSPO	22:43547519-43559248	PRE	POST	OK	17.9353	27.1022	0.595607	0.796244	0.04	0.0477892	yes
XLOC_184528	XLOC_184528	NM_001135186,NM_016428	ABI3,ABI3	ABI3	17:47283595-47308128	PRE	POST	OK	3.97852	6.03959	0.602219	0.814118	0.04105	0.0490389	yes
XLOC_293431	XLOC_293431	NM_000579,NM_001100168	CCR5,CCR5	CCR5	3:46411632-46417697	PRE	POST	OK	4.68075	7.21332	0.623924	0.930855	0.0164	0.0196376	yes
XLOC_090591	XLOC_090591	NM_001798,NM_052827	CDK2,CDK2	CDK2	12:56360555-56366568	PRE	POST	OK	5.83917	9.0856	0.63782	0.830494	0.03245	0.0387951	yes
XLOC_138217	XLOC_138217	NM_004184,NM_173701,NM_213645,NM_213646	WARS,WARS,WARS,WARS	WARS	14:100800124-100842680	PRE	POST	OK	6.61459	10.8488	0.713817	1.11449	0.00415	0.00502833	yes
XLOC_137857	XLOC_137857	NM_001170629,NM_020920	CHD8,CHD8	CHD8	14:21853352-21924273	PRE	POST	OK	14.2399	23.4477	0.719508	1.02729	0.01115	0.0133631	yes
XLOC_269731	XLOC_269731	NM_001098796,NM_001098797,NM_001098798,NM_032883	TOX2,TOX2,TOX2,TOX2	TOX2	20:42543491-42698254	PRE	POST	OK	2.23466	3.82949	0.777095	1.03413	0.00975	0.0116893	yes
XLOC_002449	XLOC_002449	NM_001206846,NM_018136	ASPM,ASPM	ASPM	1:197053214-197115824	PRE	POST	OK	3.45113	5.97121	0.790956	1.17814	0.00275	0.00344166	yes
XLOC_293430	XLOC_293430	NM_001123041,NM_001123396	CCR2,CCR2	CCR2	3:46394881-46402554	PRE	POST	OK	3.34731	5.79564	0.791964	0.856233	0.0267	0.0319368	yes
XLOC_506213	XLOC_506213	NM_001256685,NM_001256687,NM_001256688,NM_001256689,NM_001256690,NM_001256691,NM_001256692,NM_001256693,NM_014791	MELK,MELK,MELK,MELK,MELK,MELK,MELK,MELK,MELK	MELK	9:36572858-36677696	PRE	POST	OK	3.4832	6.04408	0.79511	0.993825	0.0141	0.0168904	yes
XLOC_331938	XLOC_331938	NM_001145459,NM_001145460,NM_032495,NM_139211,NM_139212	HOPX,HOPX,HOPX,HOPX,HOPX	HOPX	4:57514109-57547872	PRE	POST	OK	6.22319	11.1959	0.84724	0.912851	0.0201	0.0240587	yes
XLOC_001471	XLOC_001471	NM_006786,NM_021995	UTS2,UTS2	UTS2	1:7907619-7974006	PRE	POST	OK	15.9291	28.6992	0.849346	1.13237	0.03725	0.0445146	yes
XLOC_506454	XLOC_506454	NM_001018078,NM_004957	FPGS,FPGS	FPGS	9:130565153-130577194	PRE	POST	OK	2.28046	4.23238	0.892143	0.899785	0.0254	0.0303857	yes
XLOC_001809	XLOC_001809	NM_001048166,NM_003035	STIL,STIL	STIL	1:47715810-47780725	PRE	POST	OK	1.59017	2.9803	0.906274	0.996725	0.00795	0.00953848	yes
XLOC_269922	XLOC_269922	NM_002592,NM_182649	PCNA,PCNA	PCNA	20:5095598-5107268	PRE	POST	OK	51.6045	97.2383	0.914029	1.70715	5e-05	0.00175882	yes
XLOC_001017	XLOC_001017	NM_031423,NM_145697	NUF2,NUF2	NUF2	1:163291722-163325553	PRE	POST	OK	1.64295	3.18043	0.95293	0.832436	0.02485	0.0297292	yes
XLOC_293989	XLOC_293989	NM_001114978,NM_001114979,NM_001114980,NM_001114981,NM_001114982,NM_003722	TP63,TP63,TP63,TP63,TP63,TP63	TP63	3:189348755-189615068	PRE	POST	OK	1.36091	2.70884	0.9931	1.08787	0.0069	0.00828284	yes
XLOC_506358	XLOC_506358	NM_001042550,NM_001042551,NM_001265602,NM_006444	SMC2,SMC2,,SMC2	SMC2	9:106856493-106903700	PRE	POST	OK	2.71239	5.6019	1.04635	1.6625	5e-05	0.00175882	yes
XLOC_221099	XLOC_221099	NM_006433,NM_012483	GNLY,GNLY	GNLY	2:85921413-85925974	PRE	POST	OK	3.08272	7.98395	1.3729	1.06522	0.0416	0.0496941	yes
XLOC_001344	XLOC_001344	NM_003686,NM_006027,NM_130398	EXO1,EXO1,EXO1	EXO1	1:242011418-242053388	PRE	POST	OK	0.713398	2.03102	1.50943	1.30362	0.00325	0.003961	yes
XLOC_065442	XLOC_065442	NM_001167681,NM_001271010,NM_001271012,NM_002017	FLI1,,,FLI1	FLI1	11:128556363-128683162	PRE	POST	OK	40.1885	463.361	3.52728	6.488	5e-05	0.00175882	yes
XLOC_171157	XLOC_171157	NM_001042355,NM_015247	CYLD,CYLD	CYLD	16:50727497-50836191	PRE	POST	OK	5.05935	146.043	4.85129	2.51793	0.0001	0.00175882	yes
XLOC_414344	XLOC_414344	NM_001242350,NM_004665,NM_078488	VNN2,VNN2,VNN2	VNN2	6:133065008-133084619	PRE	POST	OK	3.54712	873.513	7.94404	9.38712	5e-05	0.00175882	yes
XLOC_002210	XLOC_002210	NM_000298,NM_181871	PKLR,PKLR	PKLR	1:155247217-155271225	PRE	POST	OK	0.0181792	82.7209	12.1517	0.264275	0.0197	0.0235808	yes
XLOC_157033	XLOC_157033	NM_001174116,NM_001174117,NM_015263	DMXL2,DMXL2,DMXL2	DMXL2	15:51739920-51914967	PRE	POST	OK	4.40265	0.190294	-4.53207	-1.92204	5e-05	0.00175882	yes
XLOC_211938	XLOC_211938	NM_002288,NM_021270	LAIR2,LAIR2	LAIR2	19:55014012-55021905	PRE	POST	OK	242.386	105.533	-1.19962	-0.93029	0.01515	0.0181437	yes
XLOC_138137	XLOC_138137	NM_001107,NM_203488	ACYP1,ACYP1	ACYP1	14:75519927-75530736	PRE	POST	OK	10.497	4.6277	-1.18161	-0.969235	0.0169	0.020235	yes
XLOC_447948	XLOC_447948	NM_031449,NM_174929	ZMIZ2,ZMIZ2	ZMIZ2	7:44788162-44811379	PRE	POST	OK	9.63434	4.85505	-0.9887	-1.05168	0.01225	0.0146784	yes
XLOC_156646	XLOC_156646	NM_001145646,NM_031301	APH1B,APH1B	APH1B	15:63569748-63601676	PRE	POST	OK	2.1238	1.18353	-0.843555	-0.786204	0.03775	0.0451099	yes
XLOC_137884	XLOC_137884	NM_001166269,NM_001166270,NM_017815	HAUS4,HAUS4,HAUS4	HAUS4	14:23415364-23426351	PRE	POST	OK	7.76993	4.69217	-0.727647	-0.873528	0.01625	0.0194582	yes
XLOC_331562	XLOC_331562	NM_000995,NM_033625	RPL34,RPL34	RPL34	4:109459345-109551639	PRE	POST	OK	2077.36	1283	-0.695233	-0.87256	0.0203	0.0242973	yes
XLOC_137883	XLOC_137883	NM_001039619,NM_006109	PRMT5,PRMT5	PRMT5	14:23388642-23398682	PRE	POST	OK	9.09301	5.61737	-0.694863	-1.11788	0.00355	0.00431948	yes
XLOC_212633	XLOC_212633	NM_000979,NM_001270490	RPL18,	RPL18	19:49118583-49140639	PRE	POST	OK	2426.2	1587.59	-0.611864	-0.815077	0.0363	0.043383	yes
XLOC_091098	XLOC_091098	NM_005691,NM_020297	ABCC9,ABCC9	ABCC9	12:21950323-22089628	PRE	POST	OK	9.52734	6.39596	-0.574913	-0.921424	0.0135	0.0161733	yes
XLOC_137882	XLOC_137882	NM_001077351,NM_001077352,NM_018107	RBM23,RBM23,RBM23	RBM23	14:23366192-23388520	PRE	POST	OK	104.943	73.1717	-0.52025	-0.90699	0.0196	0.0234612	yes
XLOC_477189	XLOC_477189	NM_001023,NM_001146227	RPS20,RPS20	RPS20	8:56980738-56987140	PRE	POST	OK	1030.03	724.819	-0.506993	-0.902014	0.0161	0.0192788	yes
XLOC_332176	XLOC_332176	NM_001013415,NM_001257069,NM_018315,NM_033632	FBXW7,FBXW7,FBXW7,FBXW7	FBXW7	4:153242409-153456452	PRE	POST	OK	203.368	147.279	-0.465541	-0.880769	0.02595	0.0310419	yes
XLOC_477315	XLOC_477315	NM_001199975,NM_001254752,NM_006294	UQCRB,UQCRB,UQCRB	UQCRB	8:97238903-97247862	PRE	POST	OK	77.7547	56.7174	-0.455139	-0.837722	0.0251	0.0300277	yes
XLOC_001917	XLOC_001917	NM_004261,NM_203341	SEP15,SEP15	SEP15	1:87328127-87380107	PRE	POST	OK	200.096	147.533	-0.439649	-0.836036	0.03405	0.0407005	yes
XLOC_157068	XLOC_157068	NM_001002857,NM_001002858,NM_001136015,NM_004039	ANXA2,ANXA2,ANXA2,ANXA2	ANXA2	15:60639349-60690185	PRE	POST	OK	58.6726	78.3207	0.416705	0.772107	0.0307	0.0367085	yes
XLOC_414117	XLOC_414117	NM_001136017,NM_001136125,NM_001136126,NM_001760	CCND3,CCND3,CCND3,CCND3	CCND3	6:41901849-42016610	PRE	POST	OK	98.8879	132.175	0.418587	0.829609	0.03265	0.0390335	yes
XLOC_090598	XLOC_090598	NM_001184796,NM_015292	ESYT1,ESYT1	ESYT1	12:56521985-56538635	PRE	POST	OK	34.2601	46.0532	0.426772	0.838241	0.03065	0.0366493	yes
XLOC_374518	XLOC_374518	NM_001040158,NM_004893,NM_138609,NM_138610	H2AFY,H2AFY,H2AFY,H2AFY	H2AFY	5:134670070-134735577	PRE	POST	OK	19.3148	26.0163	0.429709	0.790898	0.03925	0.046897	yes
XLOC_332257	XLOC_332257	NM_004346,NM_032991	CASP3,CASP3	CASP3	4:185548157-185570629	PRE	POST	OK	10.6104	15.0723	0.506418	0.861387	0.0298	0.0356355	yes
XLOC_001464	XLOC_001464	NM_007274,NM_181864,NM_181865,NM_181866	ACOT7,ACOT7,ACOT7,ACOT7	ACOT7	1:6324331-6453826	PRE	POST	OK	9.07376	13.0797	0.527561	0.789648	0.0375	0.0448122	yes
XLOC_211919	XLOC_211919	NM_001020818,NM_001020819,NM_001020820,NM_001020821,NM_138373	MYADM,MYADM,MYADM,MYADM,MYADM	MYADM	19:54369610-54380266	PRE	POST	OK	62.2882	90.6295	0.541022	0.891775	0.01705	0.0204144	yes
XLOC_090330	XLOC_090330	NM_001256799,NM_002046	GAPDH,GAPDH	GAPDH	12:6643584-6647537	PRE	POST	OK	1123.79	1702.05	0.598906	0.791129	0.04015	0.0479676	yes
XLOC_156581	XLOC_156581	NM_001167941,NM_024908	WDR76,WDR76	WDR76	15:44119111-44160617	PRE	POST	OK	6.24134	9.4794	0.602938	1.00754	0.00965	0.0115697	yes
XLOC_288114	XLOC_288114	NM_001008566,NM_003595	TPST2,TPST2	TPST2	22:26917949-26986089	PRE	POST	OK	16.0503	24.4495	0.607205	0.971312	0.01715	0.0205339	yes
XLOC_221375	XLOC_221375	NM_031942,NM_145810	CDCA7,CDCA7	CDCA7	2:174219560-174233718	PRE	POST	OK	5.62741	8.62303	0.615724	0.878534	0.02335	0.0279386	yes
XLOC_413358	XLOC_413358	NM_002131,NM_145899,NM_145901,NM_145902,NM_145903,NM_145905	HMGA1,HMGA1,HMGA1,HMGA1,HMGA1,HMGA1	HMGA1	6:34204576-34216904	PRE	POST	OK	9.19671	14.2023	0.626933	0.917657	0.02005	0.0239991	yes
XLOC_447805	XLOC_447805	NM_002452,NM_198948,NM_198949,NM_198950,NM_198952,NM_198953,NM_198954	NUDT1,NUDT1,NUDT1,NUDT1,NUDT1,NUDT1,NUDT1	NUDT1	7:2281856-2291121	PRE	POST	OK	19.9628	30.939	0.632115	0.924477	0.0242	0.0289533	yes
XLOC_041667	XLOC_041667	NM_001127182,NM_018131	CEP55,CEP55	CEP55	10:95256368-95288849	PRE	POST	OK	4.74336	7.3914	0.639939	0.906139	0.0193	0.0231025	yes
XLOC_156548	XLOC_156548	NM_144508,NM_170589	CASC5,CASC5	CASC5	15:40885507-40954881	PRE	POST	OK	8.39351	13.5952	0.695756	1.03728	0.0072	0.00864163	yes
XLOC_222458	XLOC_222458	NM_001243900,NM_005336,NM_203346	HDLBP,HDLBP,HDLBP	HDLBP	2:242166672-242293865	PRE	POST	OK	7.86101	12.8097	0.704447	0.813752	0.0123	0.0147383	yes
XLOC_001628	XLOC_001628	NM_001145454,NM_005563,NM_203399,NM_203401	STMN1,STMN1,STMN1,STMN1	STMN1	1:26210676-26233368	PRE	POST	OK	20.7212	34.2705	0.725861	1.23373	0.0015	0.00216967	yes
XLOC_222080	XLOC_222080	NM_001136037,NM_001161403,NM_001161404,NM_001256542,NM_017980	LIMS2,LIMS2,LIMS2,LIMS2,LIMS2	LIMS2	2:128395995-128439360	PRE	POST	OK	4.90293	8.23277	0.747734	1.0198	0.0073	0.00876149	yes
XLOC_065424	XLOC_065424	NM_001114121,NM_001114122,NM_001244846,NM_001274	CHEK1,CHEK1,CHEK1,CHEK1	CHEK1	11:125494763-125550793	PRE	POST	OK	3.40845	5.81777	0.771349	0.92941	0.0252	0.030147	yes
XLOC_042371	XLOC_042371	NM_001145966,NM_002417	MKI67,MKI67	MKI67	10:129894408-129924656	PRE	POST	OK	10.5439	18.664	0.823849	1.0094	0.00245	0.00307665	yes
XLOC_170560	XLOC_170560	NM_000632,NM_001145808	ITGAM,ITGAM	ITGAM	16:31271287-31344213	PRE	POST	OK	1.87667	3.35077	0.836321	1.08502	0.0054	0.0065049	yes
XLOC_212423	XLOC_212423	NM_001199570,NM_015526	CLIP3,CLIP3	CLIP3	19:36505459-36523797	PRE	POST	OK	0.914256	1.6515	0.853103	0.799697	0.0346	0.0413562	yes
XLOC_374333	XLOC_374333	NM_001104631,NM_001165899,NM_001197218,NM_001197219,NM_001197220,NM_001197221,NM_001197222,NM_001197223,NM_006203	PDE4D,PDE4D,PDE4D,PDE4D,PDE4D,PDE4D,PDE4D,PDE4D,PDE4D	PDE4D	5:58264035-59843484	PRE	POST	OK	4.41878	8.08125	0.870931	1.3151	0.00075	0.00175882	yes
XLOC_001705	XLOC_001705	NM_001190481,NM_022111	CLSPN,CLSPN	CLSPN	1:36197712-36235753	PRE	POST	OK	2.67028	5.00243	0.905638	1.34096	0.0008	0.00175882	yes
XLOC_156687	XLOC_156687	NM_004856,NM_138555	KIF23,KIF23	KIF23	15:69706532-69740767	PRE	POST	OK	2.06746	3.89053	0.912111	0.954645	0.0161	0.0192788	yes
XLOC_414410	XLOC_414410	NM_001142522,NM_012177	FBXO5,FBXO5	FBXO5	6:153291231-153304740	PRE	POST	OK	6.45983	12.3058	0.929768	1.36607	0.00085	0.00175882	yes
XLOC_184703	XLOC_184703	NM_001012270,NM_001012271,NM_001168	BIRC5,BIRC5,BIRC5	BIRC5	17:76210276-76221716	PRE	POST	OK	2.75614	6.14118	1.15587	1.29126	0.0022	0.00279375	yes
XLOC_270183	XLOC_270183	NM_001193379,NM_017859	UCKL1,UCKL1	UCKL1	20:62571178-62601218	PRE	POST	OK	69.4106	160.893	1.21287	7.64936	5e-05	0.00175882	yes
XLOC_269756	XLOC_269756	NM_007019,NM_181799,NM_181800,NM_181801,NM_181802,NM_181803	UBE2C,UBE2C,UBE2C,UBE2C,UBE2C,UBE2C	UBE2C	20:44441254-44445596	PRE	POST	OK	1.70232	4.20509	1.30463	0.887861	0.03875	0.0463015	yes
XLOC_041343	XLOC_041343	NM_018518,NM_182751	MCM10,MCM10	MCM10	10:13203553-13253104	PRE	POST	OK	0.748843	1.9247	1.3619	1.34141	0.0012	0.00194403	yes
XLOC_413507	XLOC_413507	NM_001159587,NM_001159588,NM_133493	CD109,CD109,CD109	CD109	6:74405418-74538041	PRE	POST	OK	0.728166	2.00106	1.45843	0.86062	0.01815	0.0217288	yes
XLOC_090599	XLOC_090599	NM_001199629,NM_002475	MYL6B,MYL6B	MYL6B	12:56546203-56551771	PRE	POST	OK	1.6951	4.6825	1.46591	1.252	0.00185	0.00245971	yes
XLOC_331251	XLOC_331251	NM_001042424,NM_007331,NM_133330,NM_133331,NM_133334,NM_133335	WHSC1,WHSC1,WHSC1,WHSC1,WHSC1,WHSC1	WHSC1	4:1873122-1984174	PRE	POST	OK	29.4859	126.67	2.10298	2.23223	0.0109	0.0130645	yes
XLOC_413758	XLOC_413758	NM_001010927,NM_012454	TIAM2,TIAM2	TIAM2	6:155411422-155635617	PRE	POST	OK	0.506639	2.44959	2.27351	1.15152	0.01425	0.0170689	yes
XLOC_413643	XLOC_413643	NM_000426,NM_001079823	LAMA2,LAMA2	LAMA2	6:129204285-129837710	PRE	POST	OK	0.0899108	1.88766	4.39196	1.04708	0.0237	0.0283558	yes
XLOC_287839	XLOC_287839	NM_001206998,NM_032173	ZNRF3,ZNRF3	ZNRF3	22:29279754-29453476	PRE	POST	OK	0.17869	112.758	9.30156	1.47955	5e-05	0.00175882	yes
XLOC_221645	XLOC_221645	NM_001159597,NM_015677	SH3YL1,SH3YL1	SH3YL1	2:217477-278285	PRE	POST	OK	204402	14.1627	-13.817	-15.7077	5e-05	0.00175882	yes
XLOC_294731	XLOC_294731	NM_001011655,NM_001166305,NM_001166306,NM_138399	TMEM44,TMEM44,TMEM44,TMEM44	TMEM44	3:194304996-194354150	PRE	POST	OK	4.13672	0.0614166	-6.07371	-0.70148	0.00135	0.00206634	yes
XLOC_270104	XLOC_270104	NM_012408,NM_183047,NM_183048	ZMYND8,ZMYND8,ZMYND8	ZMYND8	20:45838096-45985482	PRE	POST	OK	83.2217	10.1849	-3.03053	-4.03482	5e-05	0.00175882	yes
XLOC_414029	XLOC_414029	NM_006411,NM_032741	AGPAT1,AGPAT1	AGPAT1	6:32120578-32145994	PRE	POST	OK	58.5286	7.69361	-2.92741	-5.21511	5e-05	0.00175882	yes
XLOC_002661	XLOC_002661	NM_001204220,NM_001204221,NM_020394,NM_033213	ZNF670,ZNF695,ZNF695,ZNF670	ZNF670	1:247108848-247242115	PRE	POST	OK	3.37469	0.54855	-2.62106	-1.26811	0.0018	0.00245971	yes
XLOC_269600	XLOC_269600	NM_001083330,NM_003434	ZNF133,ZNF133	ZNF133	20:18269120-18297640	PRE	POST	OK	4.29714	0.737182	-2.54328	-1.64203	0.00135	0.00206634	yes
XLOC_294090	XLOC_294090	NM_001134380,NM_001134381,NM_014744	TBC1D5,TBC1D5,TBC1D5	TBC1D5	3:17196564-17784332	PRE	POST	OK	87.8139	16.0074	-2.45571	-3.82525	5e-05	0.00175882	yes
XLOC_212420	XLOC_212420	NM_001173514,NM_001173515,NM_003332,NM_198125	TYROBP,TYROBP,TYROBP,TYROBP	TYROBP	19:36395302-36399436	PRE	POST	OK	17.9896	3.93193	-2.19385	-1.61261	0.0047	0.00568919	yes
XLOC_138203	XLOC_138203	NR_001459,NR_003138	SNHG10,SNHG10	SNHG10	14:95998951-96001209	PRE	POST	OK	130.151	59.737	-1.12349	-1.49662	0.0003	0.00175882	yes
XLOC_157034	XLOC_157034	NM_001143917,NM_153374	LYSMD2,LYSMD2	LYSMD2	15:52015260-52043650	PRE	POST	OK	11.3163	5.78391	-0.968282	-1.14316	0.0066	0.00793748	yes
XLOC_211855	XLOC_211855	NM_001172655,NM_018260	ZNF701,ZNF701	ZNF701	19:53073495-53095419	PRE	POST	OK	4.23255	2.45001	-0.788736	-0.948442	0.01835	0.0219678	yes
XLOC_221479	XLOC_221479	NM_001037663,NM_001959,NM_021121	EEF1B2,EEF1B2,EEF1B2	EEF1B2	2:207024317-207027653	PRE	POST	OK	405.505	250.228	-0.696477	-1.21064	0.002	0.00256531	yes
XLOC_374637	XLOC_374637	NM_001099414,NM_001146726,NM_001173393,NM_012206,NM_138379	HAVCR1,TIMD4,HAVCR1,HAVCR1,TIMD4	HAVCR1	5:156345489-156485970	PRE	POST	OK	8.70526	5.72385	-0.604903	-0.790472	0.041	0.0489798	yes
XLOC_041367	XLOC_041367	NM_000724,NM_001167945,NM_201570,NM_201571,NM_201572,NM_201590,NM_201593,NM_201596,NM_201597	CACNB2,CACNB2,CACNB2,CACNB2,CACNB2,CACNB2,CACNB2,CACNB2,CACNB2	CACNB2	10:18429605-18830688	PRE	POST	OK	2.79316	1.84047	-0.601827	-0.773426	0.04075	0.0486816	yes
XLOC_170426	XLOC_170426	NM_001145204,NM_001145205	SHISA9,SHISA9	SHISA9	16:12995476-13334273	PRE	POST	OK	9.01712	5.95597	-0.598331	-1.01008	0.00785	0.0094191	yes
XLOC_448648	XLOC_448648	NM_001012456,NM_014302	SEC61G,SEC61G	SEC61G	7:54819939-54826939	PRE	POST	OK	193.489	136.092	-0.507674	-0.860203	0.0237	0.0283558	yes
XLOC_212118	XLOC_212118	NM_001199943,NM_001199944,NM_003025	SH3GL1,SH3GL1,SH3GL1	SH3GL1	19:4360363-4400565	PRE	POST	OK	15.1449	20.3734	0.427848	0.821345	0.03655	0.0436807	yes
XLOC_002117	XLOC_002117	NM_001136478,NM_001136479,NM_030920	ANP32E,ANP32E,ANP32E	ANP32E	1:150190716-150208504	PRE	POST	OK	64.01	87.0554	0.443636	0.911209	0.02035	0.024357	yes
XLOC_506473	XLOC_506473	NM_001127244,NM_001127245,NM_019594	LRRC8A,LRRC8A,LRRC8A	LRRC8A	9:131644390-131680490	PRE	POST	OK	9.15974	12.4712	0.445223	0.844651	0.0279	0.0333683	yes
XLOC_170532	XLOC_170532	NM_001193333,NM_007074	CORO1A,CORO1A	CORO1A	16:30194551-30200575	PRE	POST	OK	90.0084	126.409	0.489963	0.965127	0.0127	0.0152167	yes
XLOC_171346	XLOC_171346	NM_001083314,NM_002768	CHMP1A,CHMP1A	CHMP1A	16:89710227-89724129	PRE	POST	OK	7.04597	10.9504	0.636112	0.988201	0.0093	0.0111512	yes
XLOC_185258	XLOC_185258	NM_145255,NM_148887	MRPL10,MRPL10	MRPL10	17:45900637-45908907	PRE	POST	OK	11.8629	19.0711	0.684933	1.14995	0.0031	0.00380915	yes
XLOC_001767	XLOC_001767	NM_001256399,NM_001256401,NM_001256402,NM_022821	ELOVL1,ELOVL1,ELOVL1,ELOVL1	ELOVL1	1:43829067-43833745	PRE	POST	OK	6.43095	10.571	0.717001	0.857147	0.02595	0.0310419	yes
XLOC_138015	XLOC_138015	NM_001146015,NM_014750	DLGAP5,DLGAP5	DLGAP5	14:55614763-55658396	PRE	POST	OK	3.14572	6.10662	0.956986	0.945425	0.01165	0.0139606	yes
XLOC_116496	XLOC_116496	NM_001042517,NM_001258366,NM_001258367,NM_001258368,NM_001258369,NM_001258370,NM_030932	DIAPH3,,,,,,DIAPH3	DIAPH3	13:60239720-60738119	PRE	POST	OK	1.15637	2.35226	1.02445	1.00371	0.01275	0.0152765	yes
XLOC_294138	XLOC_294138	NM_001171171,NM_001171172,NM_001171174,NM_001337	CX3CR1,CX3CR1,CX3CR1,CX3CR1	CX3CR1	3:39304984-39323226	PRE	POST	OK	2.48179	5.66655	1.19109	1.21932	0.00095	0.00175882	yes
XLOC_090526	XLOC_090526	NM_001039960,NM_001258401,NM_001258402,NM_001258403,NM_001267615	SLC4A8,,,,	SLC4A8	12:51745499-51909547	PRE	POST	OK	0.267218	1.55008	2.53626	0.9783	0.0152	0.0182035	yes
XLOC_414311	XLOC_414311	NM_001042475,NM_001178035,NM_206921	CEP85L,CEP85L,CEP85L	CEP85L	6:118781911-119031328	PRE	POST	OK	26.099	226.769	3.11916	9.49482	5e-05	0.00175882	yes
XLOC_001615	XLOC_001615	NR_045407,NR_045408,NR_045409	RCAN3AS,RCAN3AS,RCAN3AS	RCAN3AS	1:24822822-24867534	PRE	POST	OK	4.61352	0.312761	-3.88273	-0.299543	0.01385	0.0165916	yes
XLOC_091264	XLOC_091264	NM_001130967,NM_001130968,NM_015481	ZNF385A,ZNF385A,ZNF385A	ZNF385A	12:54762919-54785083	PRE	POST	OK	2.67583	0.979534	-1.44982	-1.05314	0.0413	0.0493373	yes
XLOC_331407	XLOC_331407	NM_001040402,NM_015115	DCUN1D4,DCUN1D4	DCUN1D4	4:52709275-52783007	PRE	POST	OK	15.473	6.74493	-1.19788	-0.92959	0.02545	0.0304454	yes
XLOC_091204	XLOC_091204	NM_001126103,NM_001126104,NM_013277	RACGAP1,RACGAP1,RACGAP1	RACGAP1	12:50382869-50419307	PRE	POST	OK	4.33078	6.96177	0.684828	1.03282	0.0083	0.00995701	yes
XLOC_064989	XLOC_064989	NM_001142703,NM_001142704,NM_198947	FAM111B,FAM111B,FAM111B	FAM111B	11:58874516-58896022	PRE	POST	OK	1.77045	2.94939	0.736297	0.916245	0.02385	0.0285351	yes
XLOC_374334	XLOC_374334	NM_001145208,NM_018369	DEPDC1B,DEPDC1B	DEPDC1B	5:59892738-59995993	PRE	POST	OK	1.66525	3.39431	1.02738	1.00334	0.00965	0.0115697	yes
XLOC_413447	XLOC_413447	NM_001078174,NM_001078175,NM_001078176,NM_001078177,NM_004955	SLC29A1,SLC29A1,SLC29A1,SLC29A1,SLC29A1	SLC29A1	6:44187241-44201945	PRE	POST	OK	1.46666	3.07246	1.06686	0.86046	0.0268	0.032056	yes
XLOC_293966	XLOC_293966	NM_001242314,NM_001242317,NM_004721	MAP3K13,MAP3K13,MAP3K13	MAP3K13	3:185000728-185206916	PRE	POST	OK	2.99825	10.3394	1.78595	1.5372	0.0075	0.00900072	yes
XLOC_000831	XLOC_000831	NM_019032,NM_025008	ADAMTSL4,ADAMTSL4	ADAMTSL4	1:150521897-150552228	PRE	POST	OK	847.69	2.73834	-8.27409	-3.33539	5e-05	0.00175882	yes
XLOC_065484	XLOC_065484	NM_001191060,NM_001191061,NM_024698	SLC25A22,SLC25A22,SLC25A22	SLC25A22	11:790474-798269	PRE	POST	OK	1.75552	2.97884	0.762854	0.839471	0.0341	0.04076	yes
XLOC_374429	XLOC_374429	NM_001145678,NM_173665	KIAA0825,KIAA0825	KIAA0825	5:93486555-93954355	PRE	POST	OK	3.78088	6.77535	0.841573	0.929544	0.0293	0.0350386	yes
XLOC_413829	XLOC_413829	NM_015482,NM_021945	SLC22A23,SLC22A23	SLC22A23	6:3269206-3456793	PRE	POST	OK	0.517113	1.49952	1.53595	0.967687	0.02485	0.0297292	yes
XLOC_157085	XLOC_157085	NM_001029989,NM_014736	KIAA0101,KIAA0101	KIAA0101	15:64656504-64673702	PRE	POST	OK	4.12922	13.6736	1.72745	1.4098	0.00105	0.00175882	yes
XLOC_280184	XLOC_280184	NR_024622,NR_024623	C21orf49,C21orf49	C21orf49	21:34144410-34186053	PRE	POST	OK	0.753419	22.5787	4.90537	1.8263	0.00555	0.00668446	yes
XLOC_157005	XLOC_157005	NR_034170,NR_034171	LOC645212,LOC645212	LOC645212	15:44826633-44829125	PRE	POST	OK	12.772	7.69106	-0.731736	-0.929345	0.01835	0.0219678	yes
XLOC_476890	XLOC_476890	NR_038446,NR_038447	LOC100130231,LOC100130231	LOC100130231	8:126928955-126964691	PRE	POST	OK	342.076	2.52677	-7.08088	-1.55367	0.03715	0.0443953	yes
XLOC_000304	XLOC_000304	NM_005119	THRAP3	THRAP3	1:36690016-36771153	PRE	POST	OK	642717	32.8842	-14.2545	-40.2508	5e-05	0.00175882	yes
XLOC_041436	XLOC_041436	NR_038867	ZNF32-AS3	ZNF32-AS3	10:44124264-44170147	PRE	POST	OK	82.2062	0.0163326	-12.2973	-0.214585	0.0053	0.00638485	yes
XLOC_001592	XLOC_001592	NM_005529	HSPG2	HSPG2	1:22138757-22263750	PRE	POST	OK	105.219	0.0541486	-10.9242	-0.809351	5e-05	0.00175882	yes
XLOC_476768	XLOC_476768	NR_038406	LOC100128126	LOC100128126	8:74332262-74660187	PRE	POST	OK	134.045	0.1372	-9.93223	-1.37092	0.001	0.00175882	yes
XLOC_212154	XLOC_212154	NM_004240	TRIP10	TRIP10	19:6739706-6751529	PRE	POST	OK	250.838	0.531522	-8.88241	-2.8037	0.00345	0.00419867	yes
XLOC_294508	XLOC_294508	NR_024252	FAM86HP	FAM86HP	3:129800673-129830314	PRE	POST	OK	44.9182	0.119647	-8.55237	-1.07658	0.0052	0.00626486	yes
XLOC_042257	XLOC_042257	NM_015221	DNMBP	DNMBP	10:101635333-101769676	PRE	POST	OK	89.4675	0.248471	-8.49214	-2.45474	5e-05	0.00175882	yes
XLOC_157013	XLOC_157013	NM_004212	SLC28A2	SLC28A2	15:45544427-45571436	PRE	POST	OK	398.342	3.37064	-6.88484	-5.76456	0.0003	0.00175882	yes
XLOC_212601	XLOC_212601	NM_001205281	LOC100506012	LOC100506012	19:46984044-47104457	PRE	POST	OK	4.89593	0.0422125	-6.85777	-0.549568	0.0047	0.00568919	yes
XLOC_065993	XLOC_065993	NM_001029859	KCTD21	KCTD21	11:77882297-77899664	PRE	POST	OK	46.6744	0.468488	-6.63848	-3.22403	5e-05	0.00175882	yes
XLOC_185345	XLOC_185345	NM_022070	HEATR6	HEATR6	17:58120385-58157183	PRE	POST	OK	213.712	8.77258	-4.60652	-12.2085	5e-05	0.00175882	yes
XLOC_294659	XLOC_294659	NM_024665	TBL1XR1	TBL1XR1	3:176738204-176919596	PRE	POST	OK	264736	13513	-4.29213	-4695.56	5e-05	0.00175882	yes
XLOC_506670	XLOC_506670	NM_024761	MOB3B	MOB3B	9:27325206-27529850	PRE	POST	OK	1.26354	0.0718672	-4.136	-0.922078	0.03265	0.0390335	yes
XLOC_374073	XLOC_374073	NM_033274	ADAM19	ADAM19	5:156904035-157003388	PRE	POST	OK	21.1947	1.41503	-3.9048	-0.962196	0.01285	0.0153962	yes
XLOC_002552	XLOC_002552	NM_005401	PTPN14	PTPN14	1:214522038-214725024	PRE	POST	OK	2.09265	0.16282	-3.68398	-1.28297	0.00065	0.00175882	yes
XLOC_373815	XLOC_373815	NM_003248	THBS4	THBS4	5:79331169-79379107	PRE	POST	OK	0.988781	0.0855235	-3.53126	-0.809085	0.04135	0.0493965	yes
XLOC_374154	XLOC_374154	NR_038353	FAM153C	FAM153C	5:177433966-177479689	PRE	POST	OK	5.46331	0.700739	-2.96283	-1.71445	0.02995	0.0358145	yes
XLOC_196435	XLOC_196435	NM_153211	TTC39C	TTC39C	18:21571003-21717098	PRE	POST	OK	74.1514	13.0725	-2.50394	-1.42129	0.00685	0.00822295	yes
XLOC_477476	XLOC_477476	NR_023392	ZNF252	ZNF252	8:146198974-146231432	PRE	POST	OK	6.93422	1.30625	-2.4083	-2.57035	0.0004	0.00175882	yes
XLOC_221649	XLOC_221649	NR_033880	LOC339822	LOC339822	2:779836-864112	PRE	POST	OK	0.547785	0.105637	-2.37449	-0.573972	0.02845	0.0340238	yes
XLOC_288099	XLOC_288099	NM_000853	GSTT1	GSTT1	22:24376138-24384284	PRE	POST	OK	1.17655	0.232246	-2.34084	-0.737233	0.0362	0.0432641	yes
XLOC_116353	XLOC_116353	NM_005932	MIPEP	MIPEP	13:24304327-24471125	PRE	POST	OK	8.29213	1.645	-2.33365	-1.87881	0.0058	0.00698075	yes
XLOC_211564	XLOC_211564	NM_021185	CATSPERG	CATSPERG	19:38826442-38861674	PRE	POST	OK	1.77415	0.378661	-2.22815	-0.890303	0.03655	0.0436807	yes
XLOC_185539	XLOC_185539	NM_006822	RAB40B	RAB40B	17:80614899-80656598	PRE	POST	OK	3.07172	0.778189	-1.98085	-0.957321	0.01895	0.0226843	yes
XLOC_212399	XLOC_212399	NM_001007248	ZNF599	ZNF599	19:35248978-35264134	PRE	POST	OK	2.37778	0.632984	-1.90937	-0.939555	0.0332	0.0396885	yes
XLOC_170599	XLOC_170599	NM_025134	CHD9	CHD9	16:53088910-53361414	PRE	POST	OK	19.8675	6.17861	-1.68506	-2.50445	5e-05	0.00175882	yes
XLOC_091491	XLOC_091491	NM_024953	NAA25	NAA25	12:112464492-112546635	PRE	POST	OK	20.6698	7.04456	-1.55294	-2.70965	0.0001	0.00175882	yes
XLOC_373921	XLOC_373921	NM_181705	LYRM7	LYRM7	5:130506640-130541322	PRE	POST	OK	8.31358	2.86069	-1.53911	-1.00499	0.03305	0.0395097	yes
XLOC_529826	XLOC_529826	NM_001012755	MCART6	MCART6	X:103139054-103401708	PRE	POST	OK	31.4072	10.9631	-1.51843	-0.902241	0.0359	0.042907	yes
XLOC_269969	XLOC_269969	NM_000099	CST3	CST3	20:23614293-23618574	PRE	POST	OK	18.1091	6.49481	-1.47935	-1.25828	0.00115	0.00186726	yes
XLOC_374150	XLOC_374150	NM_007255	B4GALT7	B4GALT7	5:177027112-177037403	PRE	POST	OK	7.53449	2.9375	-1.35892	-1.55378	0.0046	0.00556868	yes
XLOC_374356	XLOC_374356	NR_027386	GUSBP3	GUSBP3	5:68935289-69006272	PRE	POST	OK	2.14636	0.855687	-1.32674	-0.76855	0.02065	0.0247152	yes
XLOC_211372	XLOC_211372	NR_015379	UCA1	UCA1	19:15939756-15948365	PRE	POST	OK	0.826927	0.331211	-1.32001	-0.844345	0.01975	0.0236406	yes
XLOC_221800	XLOC_221800	NM_018079	SRBD1	SRBD1	2:45615818-45838433	PRE	POST	OK	6.15827	2.51299	-1.29312	-0.935164	0.0272	0.0325336	yes
XLOC_506404	XLOC_506404	NR_027442	LOC100288842	LOC100288842	9:123555774-123561009	PRE	POST	OK	7.1712	2.97627	-1.26871	-0.834766	0.03375	0.0403432	yes
XLOC_414106	XLOC_414106	NM_145063	C6orf130	C6orf130	6:41019978-41040268	PRE	POST	OK	39.9635	16.9869	-1.23426	-1.87523	0.00015	0.00175882	yes
XLOC_331662	XLOC_331662	NR_003675	GUSBP5	GUSBP5	4:144480624-144482613	PRE	POST	OK	1.28133	0.555689	-1.2053	-0.685347	0.032	0.0382583	yes
XLOC_041685	XLOC_041685	NM_014803	ZNF518A	ZNF518A	10:97889471-97923517	PRE	POST	OK	7.43257	3.52364	-1.0768	-0.940038	0.02235	0.0267448	yes
XLOC_529405	XLOC_529405	NM_021946	BCORL1	BCORL1	X:129115680-129192058	PRE	POST	OK	5.48568	2.60635	-1.07364	-0.941645	0.01105	0.0132438	yes
XLOC_374376	XLOC_374376	NM_001164443	ANKRD31	ANKRD31	5:74364121-74532703	PRE	POST	OK	0.716613	0.35251	-1.02353	-0.851673	0.0285	0.0340835	yes
XLOC_211481	XLOC_211481	NM_018025	GPATCH1	GPATCH1	19:33571785-33621318	PRE	POST	OK	6.79061	3.42448	-0.987658	-1.07515	0.00515	0.0062049	yes
XLOC_002031	XLOC_002031	NM_005725	TSPAN2	TSPAN2	1:115590006-115632125	PRE	POST	OK	12.5839	7.02896	-0.840197	-0.876166	0.03305	0.0395097	yes
XLOC_042274	XLOC_042274	NM_006993	NPM3	NPM3	10:103541081-103543170	PRE	POST	OK	11.2986	6.33945	-0.833713	-0.908087	0.0159	0.0190398	yes
XLOC_529615	XLOC_529615	NM_025159	CXorf21	CXorf21	X:30576826-30596047	PRE	POST	OK	2.40863	1.36506	-0.819251	-0.740944	0.0401	0.0479083	yes
XLOC_156421	XLOC_156421	NR_003328	SNORD116-13	SNORD116-13	15:25324129-25325161	PRE	POST	OK	9.81711	5.61176	-0.806845	-0.764658	0.03065	0.0366493	yes
XLOC_001861	XLOC_001861	NM_032027	TM2D1	TM2D1	1:62139365-62191251	PRE	POST	OK	96.5231	55.2635	-0.804548	-0.945748	0.0209	0.0250135	yes
XLOC_002466	XLOC_002466	NM_016456	TMEM9	TMEM9	1:201103898-201123632	PRE	POST	OK	12.9794	7.50703	-0.789905	-0.895868	0.026	0.0311015	yes
XLOC_413415	XLOC_413415	NM_001134493	TOMM6	TOMM6	6:41755180-41760674	PRE	POST	OK	152.553	89.2209	-0.773853	-1.21301	0.0025	0.00313869	yes
XLOC_090669	XLOC_090669	NM_000239	LYZ	LYZ	12:69742133-69748013	PRE	POST	OK	14.3365	8.55095	-0.745535	-0.862751	0.0208	0.0248942	yes
XLOC_448530	XLOC_448530	NM_019059	TOMM7	TOMM7	7:22852251-22862421	PRE	POST	OK	1212.13	736.85	-0.718104	-1.25588	0.00105	0.00175882	yes
XLOC_090348	XLOC_090348	NM_138425	C12orf57	C12orf57	12:7051873-7055253	PRE	POST	OK	243.691	148.986	-0.709883	-1.19144	0.0023	0.00289048	yes
XLOC_294641	XLOC_294641	NR_001566	TERC	TERC	3:169482397-169482848	PRE	POST	OK	106.545	65.8098	-0.695087	-0.977126	0.0076	0.0091205	yes
XLOC_413422	XLOC_413422	NM_015349	KIAA0240	KIAA0240	6:42748648-42836296	PRE	POST	OK	86.9999	54.0168	-0.687607	-1.24351	0.00385	0.00468099	yes
XLOC_529734	XLOC_529734	NM_002547	OPHN1	OPHN1	X:67262185-67653299	PRE	POST	OK	6.99686	4.35837	-0.68292	-1.11879	0.0018	0.00245971	yes
XLOC_211929	XLOC_211929	NM_001013	RPS9	RPS9	19:54704725-54711523	PRE	POST	OK	1285.9	808.32	-0.669781	-1.12147	0.00455	0.00550975	yes
XLOC_156884	XLOC_156884	NR_027053	LOC646214	LOC646214	15:21932513-21940739	PRE	POST	OK	5.91935	3.73678	-0.663645	-1.07349	0.0035	0.00425901	yes
XLOC_000527	XLOC_000527	NM_006820	IFI44L	IFI44L	1:79086062-79111830	PRE	POST	OK	3.54162	2.25539	-0.651033	-0.88277	0.02065	0.0247152	yes
XLOC_001836	XLOC_001836	NM_016126	HSPB11	HSPB11	1:54382244-54433841	PRE	POST	OK	37.4885	23.9336	-0.647415	-0.865935	0.0337	0.0402838	yes
XLOC_221785	XLOC_221785	NM_004718	COX7A2L	COX7A2L	2:42577032-42588640	PRE	POST	OK	245.139	156.731	-0.645311	-1.10986	0.00485	0.00586639	yes
XLOC_041293	XLOC_041293	NM_014023	WDR37	WDR37	10:1102689-1178448	PRE	POST	OK	7.52754	4.88458	-0.623945	-0.532785	0.0294	0.035158	yes
XLOC_507122	XLOC_507122	NM_001080849	DNLZ	DNLZ	9:139256351-139258241	PRE	POST	OK	19.937	13.0294	-0.61367	-0.78478	0.0403	0.0481457	yes
XLOC_041979	XLOC_041979	NM_173496	MPP7	MPP7	10:28339890-28571067	PRE	POST	OK	5.04364	3.30307	-0.610658	-0.841207	0.02555	0.0305647	yes
XLOC_287952	XLOC_287952	NM_001098	ACO2	ACO2	22:41865128-41940479	PRE	POST	OK	30.5501	20.0228	-0.609538	-0.987295	0.0199	0.0238198	yes
XLOC_221757	XLOC_221757	NM_032574	DPY30	DPY30	2:32248492-32266024	PRE	POST	OK	34.5761	22.8762	-0.595927	-0.870487	0.02425	0.029013	yes
XLOC_001739	XLOC_001739	NM_016257	HPCAL4	HPCAL4	1:40144644-40157089	PRE	POST	OK	8.45464	5.65917	-0.579154	-0.937243	0.0116	0.0139009	yes
XLOC_001526	XLOC_001526	NM_001089591	UQCRHL	UQCRHL	1:16133656-16134194	PRE	POST	OK	77.8747	52.8438	-0.559421	-0.912127	0.01715	0.0205339	yes
XLOC_184392	XLOC_184392	NM_000981	RPL19	RPL19	17:37356470-37360986	PRE	POST	OK	2351.2	1628.31	-0.53002	-0.784475	0.03865	0.0461824	yes
XLOC_116329	XLOC_116329	NR_027995	ANKRD20A9P	ANKRD20A9P	13:19408542-19446109	PRE	POST	OK	1.22284	0.847534	-0.528894	-0.804079	0.0271	0.0324143	yes
XLOC_448445	XLOC_448445	NM_182491	ZFAND2A	ZFAND2A	7:1192542-1199855	PRE	POST	OK	20.4278	14.1887	-0.525797	-0.764878	0.0398	0.0475508	yes
XLOC_001699	XLOC_001699	NM_007167	ZMYM6	ZMYM6	1:35451551-35497703	PRE	POST	OK	6.24939	4.38427	-0.511379	-0.83814	0.02645	0.0316389	yes
XLOC_001020	XLOC_001020	NM_004528	MGST3	MGST3	1:165599491-165625564	PRE	POST	OK	44.1885	31.1916	-0.502513	-0.897786	0.0184	0.0220276	yes
XLOC_157187	XLOC_157187	NM_025234	WDR61	WDR61	15:78575577-78591940	PRE	POST	OK	30.3463	21.5653	-0.492806	-0.789175	0.03195	0.0381989	yes
XLOC_280205	XLOC_280205	NM_015358	MORC3	MORC3	21:37691750-37749097	PRE	POST	OK	38.9122	27.8287	-0.48365	-0.870303	0.0242	0.0289533	yes
XLOC_332025	XLOC_332025	NM_020803	KLHL8	KLHL8	4:88081645-88141674	PRE	POST	OK	14.9329	10.7145	-0.478935	-0.859431	0.03345	0.0399858	yes
XLOC_331330	XLOC_331330	NR_003132	HSP90AB2P	HSP90AB2P	4:13335036-13339925	PRE	POST	OK	36.44	26.1652	-0.477874	-0.825612	0.0236	0.0282366	yes
XLOC_221145	XLOC_221145	NM_001862	COX5B	COX5B	2:98262520-98264657	PRE	POST	OK	433.795	312.447	-0.473402	-0.901969	0.0157	0.018801	yes
XLOC_185088	XLOC_185088	NM_000421	KRT10	KRT10	17:38974368-38992526	PRE	POST	OK	19.7363	14.393	-0.455482	-0.775434	0.0401	0.0479083	yes
XLOC_448505	XLOC_448505	NM_002489	NDUFA4	NDUFA4	7:10971579-10979813	PRE	POST	OK	112.865	82.8929	-0.44528	-0.836283	0.0267	0.0319368	yes
XLOC_170813	XLOC_170813	NM_001861	COX4I1	COX4I1	16:85833172-85840607	PRE	POST	OK	865.959	639.129	-0.438193	-0.806129	0.03295	0.0393911	yes
XLOC_331744	XLOC_331744	NM_018248	NEIL3	NEIL3	4:178230898-178284092	PRE	POST	OK	38.7289	28.5879	-0.438005	-0.802575	0.03995	0.0477297	yes
XLOC_065126	XLOC_065126	NM_030981	RAB1B	RAB1B	11:66036026-66045571	PRE	POST	OK	85.3053	111.424	0.385355	0.774654	0.03885	0.0464202	yes
XLOC_529215	XLOC_529215	NM_002444	MSN	MSN	X:64887510-64961793	PRE	POST	OK	63.6952	84.1385	0.40158	0.779267	0.03625	0.0433235	yes
XLOC_091192	XLOC_091192	NM_006082	TUBA1B	TUBA1B	12:49519907-49525304	PRE	POST	OK	80.7172	107.987	0.419907	0.771546	0.04155	0.0496347	yes
XLOC_041769	XLOC_041769	NM_005445	SMC3	SMC3	10:112327436-112365577	PRE	POST	OK	22.6613	30.3529	0.421602	0.850655	0.02835	0.0339046	yes
XLOC_373930	XLOC_373930	NM_005732	RAD50	RAD50	5:131892615-131982227	PRE	POST	OK	7.15938	9.65727	0.431781	0.833009	0.0346	0.0413562	yes
XLOC_476804	XLOC_476804	NM_001359	DECR1	DECR1	8:91013579-91095107	PRE	POST	OK	46.3915	62.606	0.432442	0.782644	0.04105	0.0490389	yes
XLOC_090773	XLOC_090773	NM_001145199	C12orf75	C12orf75	12:105724413-105765296	PRE	POST	OK	35.361	47.9004	0.437879	0.770788	0.0415	0.0495754	yes
XLOC_476895	XLOC_476895	NM_002467	MYC	MYC	8:128748314-128753680	PRE	POST	OK	26.2392	36.0132	0.456799	0.907461	0.017	0.0203546	yes
XLOC_090313	XLOC_090313	NM_001759	CCND2	CCND2	12:4378830-4414559	PRE	POST	OK	37.8399	51.9549	0.457352	0.878994	0.02175	0.0260283	yes
XLOC_041538	XLOC_041538	NM_019058	DDIT4	DDIT4	10:74033676-74035797	PRE	POST	OK	16.789	23.1247	0.461922	0.781394	0.03615	0.0432048	yes
XLOC_211611	XLOC_211611	NM_052848	CCDC97	CCDC97	19:41816068-41830984	PRE	POST	OK	10.0417	13.8877	0.467808	0.834044	0.0336	0.0401647	yes
XLOC_184656	XLOC_184656	NM_004252	SLC9A3R1	SLC9A3R1	17:72744750-72765510	PRE	POST	OK	68.052	94.4079	0.47227	0.921599	0.0158	0.0189203	yes
XLOC_221680	XLOC_221680	NM_005742	PDIA6	PDIA6	2:10861774-10952960	PRE	POST	OK	26.1183	36.2764	0.47397	0.901568	0.01865	0.0223261	yes
XLOC_530023	XLOC_530023	NM_005334	HCFC1	HCFC1	X:153213007-153237752	PRE	POST	OK	10.1209	14.0834	0.476659	0.886001	0.02575	0.0308036	yes
XLOC_090937	XLOC_090937	NM_152441	FBXL14	FBXL14	12:1675158-1703588	PRE	POST	OK	15.1759	21.1962	0.48203	0.85992	0.0253	0.0302662	yes
XLOC_212054	XLOC_212054	NM_138774	R3HDM4	R3HDM4	19:896076-913225	PRE	POST	OK	26.3405	36.7919	0.482106	0.88032	0.0276	0.0330099	yes
XLOC_288105	XLOC_288105	NM_031444	C22orf13	C22orf13	22:24936405-24951275	PRE	POST	OK	5.85336	8.30669	0.505008	0.80551	0.033	0.0394504	yes
XLOC_157155	XLOC_157155	NM_005697	SCAMP2	SCAMP2	15:75136008-75165702	PRE	POST	OK	38.4066	54.6364	0.508508	0.858753	0.0244	0.029192	yes
XLOC_448616	XLOC_448616	NM_013284	POLM	POLM	7:44111334-44122129	PRE	POST	OK	5.7449	8.1821	0.510189	0.811428	0.03495	0.041774	yes
XLOC_212145	XLOC_212145	NM_003685	KHSRP	KHSRP	19:6413118-6424823	PRE	POST	OK	28.342	40.4028	0.511515	1.01342	0.0095	0.0113902	yes
XLOC_294192	XLOC_294192	NM_016479	SHISA5	SHISA5	3:48488113-48541661	PRE	POST	OK	51.5812	73.573	0.51233	0.866816	0.02655	0.0317578	yes
XLOC_413679	XLOC_413679	NM_021243	ABRACL	ABRACL	6:139349818-139364439	PRE	POST	OK	72.327	103.203	0.512878	0.924421	0.0159	0.0190398	yes
XLOC_001462	XLOC_001462	NM_012405	ICMT	ICMT	1:6265698-6296044	PRE	POST	OK	5.83303	8.35518	0.518426	0.840209	0.0303	0.036232	yes
XLOC_448531	XLOC_448531	NM_032581	FAM126A	FAM126A	7:22980877-23053770	PRE	POST	OK	4.02578	5.77755	0.521188	0.846882	0.033	0.0394504	yes
XLOC_287875	XLOC_287875	NM_003405	YWHAH	YWHAH	22:32329506-32353590	PRE	POST	OK	11.8618	17.0303	0.52178	0.86115	0.02185	0.0261478	yes
XLOC_065314	XLOC_065314	NM_000019	ACAT1	ACAT1	11:107992257-108018949	PRE	POST	OK	8.17767	11.776	0.526093	0.82199	0.0341	0.04076	yes
XLOC_170615	XLOC_170615	NM_005953	MT2A	MT2A	16:56642452-56643481	PRE	POST	OK	77.4502	111.592	0.526894	0.871766	0.02255	0.0269837	yes
XLOC_041563	XLOC_041563	NM_020338	ZMIZ1	ZMIZ1	10:80828745-81076285	PRE	POST	OK	9.51919	13.8326	0.539156	0.954866	0.0159	0.0190398	yes
XLOC_448155	XLOC_448155	NM_005273	GNB2	GNB2	7:100271362-100276839	PRE	POST	OK	38.2029	55.5996	0.541395	1.08333	0.0051	0.00614504	yes
XLOC_221672	XLOC_221672	NM_006826	YWHAQ	YWHAQ	2:9724099-9771106	PRE	POST	OK	94.385	137.759	0.545515	1.01191	0.0078	0.00935929	yes
XLOC_065498	XLOC_065498	NM_001909	CTSD	CTSD	11:1490676-1785501	PRE	POST	OK	30.5242	44.6588	0.548989	0.912456	0.02005	0.0239991	yes
XLOC_413912	XLOC_413912	NM_003519	HIST1H2BL	HIST1H2BL	6:27774019-27777287	PRE	POST	OK	301.421	441.522	0.550705	0.765249	0.0389	0.0464798	yes
XLOC_090855	XLOC_090855	NM_014730	MLEC	MLEC	12:121124948-121139667	PRE	POST	OK	5.88385	8.63985	0.554247	0.813745	0.0305	0.0364708	yes
XLOC_116132	XLOC_116132	NM_000059	BRCA2	BRCA2	13:32889616-32973809	PRE	POST	OK	1.48327	2.18005	0.555586	0.84738	0.03185	0.0380799	yes
XLOC_212087	XLOC_212087	NM_032737	LMNB2	LMNB2	19:2428162-2456966	PRE	POST	OK	4.55864	6.70101	0.555774	0.899809	0.01985	0.0237601	yes
XLOC_184278	XLOC_184278	NM_001190452	MTRNR2L1	MTRNR2L1	17:22022436-22023991	PRE	POST	OK	9.45076	13.9161	0.55825	0.89714	0.01555	0.0186217	yes
XLOC_287923	XLOC_287923	NM_014508	APOBEC3C	APOBEC3C	22:39410076-39416801	PRE	POST	OK	68.9794	101.645	0.559299	0.874743	0.02165	0.0259092	yes
XLOC_413489	XLOC_413489	NM_000947	PRIM2	PRIM2	6:57182421-57513376	PRE	POST	OK	5.76782	8.57539	0.572177	0.7877	0.0347	0.0414754	yes
XLOC_171109	XLOC_171109	NM_138447	ZNF689	ZNF689	16:30613880-30621701	PRE	POST	OK	3.10395	4.62413	0.575078	0.772005	0.03965	0.0473722	yes
XLOC_171019	XLOC_171019	NM_016641	GDE1	GDE1	16:19513009-19533450	PRE	POST	OK	6.77467	10.1147	0.578234	0.956208	0.0112	0.013423	yes
XLOC_221368	XLOC_221368	NM_003642	HAT1	HAT1	2:172778919-172848828	PRE	POST	OK	12.6386	18.9125	0.581499	0.952919	0.0134	0.016054	yes
XLOC_269913	XLOC_269913	NM_001810	CENPB	CENPB	20:3764280-3767337	PRE	POST	OK	24.3649	36.6143	0.587601	1.01657	0.008	0.00959832	yes
XLOC_414055	XLOC_414055	NM_001188	BAK1	BAK1	6:33538401-33548121	PRE	POST	OK	15.195	22.8351	0.587656	0.976496	0.0105	0.0125861	yes
XLOC_413884	XLOC_413884	NM_003513	HIST1H2AB	HIST1H2AB	6:26033319-26033796	PRE	POST	OK	85.2656	128.384	0.59043	1.00738	0.0067	0.00804329	yes
XLOC_413220	XLOC_413220	NM_003536	HIST1H3H	HIST1H3H	6:27777576-27779674	PRE	POST	OK	672.163	1013.66	0.592685	0.973149	0.01135	0.0136024	yes
XLOC_002146	XLOC_002146	NM_005620	S100A11	S100A11	1:152004981-152009511	PRE	POST	OK	397.696	601.277	0.596361	1.13691	0.0033	0.00402026	yes
XLOC_294116	XLOC_294116	NM_017801	CMTM6	CMTM6	3:32522793-32545744	PRE	POST	OK	21.5171	32.5537	0.597337	1.12751	0.0027	0.00337937	yes
XLOC_000226	XLOC_000226	NM_005517	HMGN2	HMGN2	1:26798901-26803133	PRE	POST	OK	142.456	215.686	0.598411	1.1729	0.002	0.00256531	yes
XLOC_413190	XLOC_413190	NM_003524	HIST1H2BH	HIST1H2BH	6:26251878-26252303	PRE	POST	OK	481.164	728.912	0.599215	1.06839	0.0044	0.00532961	yes
XLOC_091463	XLOC_091463	NM_014325	CORO1C	CORO1C	12:109038886-109125341	PRE	POST	OK	6.71107	10.1804	0.601173	0.76266	0.0418	0.0499317	yes
XLOC_269859	XLOC_269859	NM_025219	DNAJC5	DNAJC5	20:62526454-62567384	PRE	POST	OK	2.7073	4.11081	0.602569	0.925996	0.0135	0.0161733	yes
XLOC_413928	XLOC_413928	NM_003514	HIST1H2AM	HIST1H2AM	6:27860476-27860963	PRE	POST	OK	285.514	434.625	0.606209	1.17223	0.0027	0.00337937	yes
XLOC_293773	XLOC_293773	NM_021937	EEFSEC	EEFSEC	3:127872312-128127489	PRE	POST	OK	8.17561	12.4998	0.612512	0.922333	0.01535	0.0183827	yes
XLOC_506889	XLOC_506889	NM_153695	ZNF367	ZNF367	9:99148224-99180669	PRE	POST	OK	2.88446	4.42329	0.616817	0.810358	0.03255	0.0389143	yes
XLOC_413212	XLOC_413212	NM_080596	HIST1H2AH	HIST1H2AH	6:27114800-27115761	PRE	POST	OK	537.159	829.948	0.627673	0.901185	0.01555	0.0186217	yes
XLOC_287889	XLOC_287889	NM_006739	MCM5	MCM5	22:35795257-35820495	PRE	POST	OK	8.84432	14.046	0.667334	1.09746	0.00315	0.00385373	yes
XLOC_116128	XLOC_116128	NM_194318	B3GALTL	B3GALTL	13:31773377-31906411	PRE	POST	OK	2.94927	4.70206	0.672935	0.789426	0.0301	0.0359934	yes
XLOC_066141	XLOC_066141	NM_002105	H2AFX	H2AFX	11:118955254-118966535	PRE	POST	OK	119.274	191.131	0.680275	1.23469	0.0012	0.00194403	yes
XLOC_170673	XLOC_170673	NM_001950	E2F4	E2F4	16:67225651-67232821	PRE	POST	OK	8.57542	13.7592	0.682118	0.7836	0.0307	0.0367085	yes
XLOC_090328	XLOC_090328	NM_014865	NCAPD2	NCAPD2	12:6601275-6641196	PRE	POST	OK	8.53723	13.7587	0.688499	0.946826	0.0168	0.0201155	yes
XLOC_222113	XLOC_222113	NM_005915	MCM6	MCM6	2:136597195-136634194	PRE	POST	OK	14.0839	22.813	0.695802	1.14026	0.00345	0.00419867	yes
XLOC_413232	XLOC_413232	NM_003511	HIST1H2AL	HIST1H2AL	6:27832958-27835508	PRE	POST	OK	592.542	963.96	0.702057	1.00001	0.01135	0.0136024	yes
XLOC_196203	XLOC_196203	NM_006101	NDC80	NDC80	18:2537523-2616634	PRE	POST	OK	10.2505	16.7831	0.711313	0.867207	0.03135	0.0374834	yes
XLOC_116320	XLOC_116320	NM_007111	TFDP1	TFDP1	13:114239002-114295788	PRE	POST	OK	14.9255	24.4563	0.712428	0.825616	0.00915	0.0109722	yes
XLOC_000386	XLOC_000386	NM_015112	MAST2	MAST2	1:46269284-46501796	PRE	POST	OK	1.01812	1.67111	0.714901	0.878159	0.02995	0.0358145	yes
XLOC_413925	XLOC_413925	NM_003533	HIST1H3I	HIST1H3I	6:27839622-27840099	PRE	POST	OK	17.5298	28.7929	0.715902	0.808596	0.02745	0.0328312	yes
XLOC_002646	XLOC_002646	NM_000143	FH	FH	1:241660856-241683085	PRE	POST	OK	5.86065	9.63746	0.717592	1.04903	0.0042	0.00508873	yes
XLOC_222049	XLOC_222049	NM_152515	CKAP2L	CKAP2L	2:113493931-113522254	PRE	POST	OK	1.84865	3.06658	0.730163	0.807689	0.0364	0.0435021	yes
XLOC_001603	XLOC_001603	NM_004091	E2F2	E2F2	1:23831699-23857834	PRE	POST	OK	6.9405	11.5723	0.73757	1.17295	0.0016	0.00226271	yes
XLOC_091079	XLOC_091079	NM_175054	HIST4H4	HIST4H4	12:14918902-14924840	PRE	POST	OK	250.519	419.425	0.743489	1.04157	0.016	0.0191593	yes
XLOC_294259	XLOC_294259	NM_001947	DUSP7	DUSP7	3:52082936-52090461	PRE	POST	OK	2.91228	4.89829	0.750129	0.965744	0.0103	0.0123468	yes
XLOC_170365	XLOC_170365	NM_152341	PAQR4	PAQR4	16:3019341-3030540	PRE	POST	OK	3.93547	6.65078	0.756989	1.0201	0.00685	0.00822295	yes
XLOC_373733	XLOC_373733	NM_006144	GZMA	GZMA	5:54398473-54406082	PRE	POST	OK	18.9739	32.1355	0.760157	1.04843	0.0078	0.00935929	yes
XLOC_413352	XLOC_413352	NM_002263	KIFC1	KIFC1	6:33359312-33378318	PRE	POST	OK	2.5773	4.36578	0.760379	0.99086	0.0111	0.0133036	yes
XLOC_413165	XLOC_413165	NM_003531	HIST1H3C	HIST1H3C	6:26044084-26046097	PRE	POST	OK	69.7796	118.824	0.767948	0.822098	0.0301	0.0359934	yes
XLOC_507053	XLOC_507053	NM_032799	ZDHHC12	ZDHHC12	9:131464801-131486408	PRE	POST	OK	5.18578	8.89967	0.779192	0.928352	0.0178	0.0213105	yes
XLOC_001248	XLOC_001248	NM_016343	CENPF	CENPF	1:214776358-214837914	PRE	POST	OK	3.02872	5.2214	0.785729	1.32197	0.00095	0.00175882	yes
XLOC_041662	XLOC_041662	NM_004523	KIF11	KIF11	10:94352824-94415154	PRE	POST	OK	5.66382	9.79274	0.789937	1.28686	0.0015	0.00216967	yes
XLOC_184511	XLOC_184511	NM_013351	TBX21	TBX21	17:45810592-45823521	PRE	POST	OK	3.10779	5.46774	0.815057	0.976509	0.0102	0.0122279	yes
XLOC_373766	XLOC_373766	NM_022909	CENPH	CENPH	5:68485374-68506184	PRE	POST	OK	3.22118	5.68363	0.819222	0.892415	0.0175	0.0209521	yes
XLOC_413222	XLOC_413222	NM_003521	HIST1H2BM	HIST1H2BM	6:27780076-27783509	PRE	POST	OK	120.666	214.371	0.829087	1.19133	0.0015	0.00216967	yes
XLOC_184449	XLOC_184449	NM_032353	VPS25	VPS25	17:40925453-40931617	PRE	POST	OK	9.31286	16.591	0.833107	1.22315	0.0007	0.00175882	yes
XLOC_211201	XLOC_211201	NM_005483	CHAF1A	CHAF1A	19:4402624-4443675	PRE	POST	OK	3.82417	6.82983	0.836703	1.34101	0.00085	0.00175882	yes
XLOC_413926	XLOC_413926	NM_003546	HIST1H4L	HIST1H4L	6:27840925-27841289	PRE	POST	OK	32.7353	58.6576	0.841469	1.0577	0.00785	0.0094191	yes
XLOC_000247	XLOC_000247	NM_031459	SESN2	SESN2	1:28585962-28609016	PRE	POST	OK	1.78319	3.20598	0.846305	0.794745	0.0261	0.0312207	yes
XLOC_065897	XLOC_065897	NM_020470	YIF1A	YIF1A	11:66052050-66056638	PRE	POST	OK	3.56152	6.45494	0.857913	0.8034	0.036	0.0430261	yes
XLOC_506210	XLOC_506210	NM_022343	GLIPR2	GLIPR2	9:36136680-36164624	PRE	POST	OK	10.2515	18.7371	0.870057	0.997361	0.0189	0.0226246	yes
XLOC_373765	XLOC_373765	NM_031966	CCNB1	CCNB1	5:68462836-68474070	PRE	POST	OK	3.05716	5.59447	0.871809	0.993297	0.0126	0.015097	yes
XLOC_184737	XLOC_184737	NM_144999	LRRC45	LRRC45	17:79981279-79989041	PRE	POST	OK	1.11921	2.05249	0.874891	0.932431	0.0167	0.0199961	yes
XLOC_413276	XLOC_413276	NM_178014	TUBB	TUBB	6:30688156-30693195	PRE	POST	OK	63.9762	117.376	0.875534	1.62511	5e-05	0.00175882	yes
XLOC_185462	XLOC_185462	NM_003258	TK1	TK1	17:76170014-76183285	PRE	POST	OK	5.71783	10.5506	0.883783	1.06	0.0066	0.00793748	yes
XLOC_222042	XLOC_222042	NM_004336	BUB1	BUB1	2:111395408-111435684	PRE	POST	OK	4.55184	8.40538	0.884863	1.35277	0.0006	0.00175882	yes
XLOC_065035	XLOC_065035	NM_004111	FEN1	FEN1	11:61560108-61564714	PRE	POST	OK	3.11847	5.82046	0.900291	1.14502	0.002	0.00256531	yes
XLOC_293768	XLOC_293768	NM_004526	MCM2	MCM2	3:127317252-127341281	PRE	POST	OK	3.34075	6.30114	0.915441	1.34468	0.0002	0.00175882	yes
XLOC_212280	XLOC_212280	NM_018154	ASF1B	ASF1B	19:14230132-14247555	PRE	POST	OK	5.54647	10.579	0.931561	1.21086	0.00215	0.00273117	yes
XLOC_413898	XLOC_413898	NM_003534	HIST1H3G	HIST1H3G	6:26271145-26271612	PRE	POST	OK	21.3182	40.6725	0.931967	1.10255	0.00255	0.00319317	yes
XLOC_185031	XLOC_185031	NM_002985	CCL5	CCL5	17:34198495-34207377	PRE	POST	OK	20.3809	39.1118	0.94039	1.586	0.0001	0.00175882	yes
XLOC_185078	XLOC_185078	NM_001067	TOP2A	TOP2A	17:38544772-38574202	PRE	POST	OK	6.80741	13.3891	0.975887	1.76722	5e-05	0.00175882	yes
XLOC_477099	XLOC_477099	NM_006158	NEFL	NEFL	8:24808468-24814131	PRE	POST	OK	1.00693	1.99524	0.986595	1.07064	0.00615	0.00739982	yes
XLOC_066084	XLOC_066084	NM_006235	POU2AF1	POU2AF1	11:111222977-111250157	PRE	POST	OK	3.50688	6.97437	0.991875	1.25771	0.0005	0.00175882	yes
XLOC_220839	XLOC_220839	NM_001165931	RRM2	RRM2	2:10262694-10271546	PRE	POST	OK	21.7012	43.1777	0.992512	1.74771	5e-05	0.00175882	yes
XLOC_184411	XLOC_184411	NM_001254	CDC6	CDC6	17:38444100-38459413	PRE	POST	OK	1.52976	3.04654	0.993869	0.820331	0.0414	0.0494561	yes
XLOC_331387	XLOC_331387	NM_018177	N4BP2	N4BP2	4:40044536-40159874	PRE	POST	OK	6.01168	12.0286	1.00062	0.978169	0.00545	0.00656465	yes
XLOC_184730	XLOC_184730	NM_002949	MRPL12	MRPL12	17:79670399-79674556	PRE	POST	OK	4.52951	9.11482	1.00886	1.10451	0.00325	0.003961	yes
XLOC_447920	XLOC_447920	NM_018685	ANLN	ANLN	7:36363758-36493400	PRE	POST	OK	1.97317	4.01139	1.02359	1.3005	0.001	0.00175882	yes
XLOC_529065	XLOC_529065	NM_016937	POLA1	POLA1	X:24711846-25015102	PRE	POST	OK	3.17651	6.49905	1.03279	1.00372	0.0063	0.00757962	yes
XLOC_000354	XLOC_000354	NM_001255	CDC20	CDC20	1:43824625-43828873	PRE	POST	OK	1.85324	3.83726	1.05003	0.989109	0.0067	0.00804329	yes
XLOC_156635	XLOC_156635	NM_004701	CCNB2	CCNB2	15:59397283-59417244	PRE	POST	OK	3.60909	7.53936	1.0628	1.17854	0.004	0.00486246	yes
XLOC_374638	XLOC_374638	NM_032782	HAVCR2	HAVCR2	5:156512842-156536248	PRE	POST	OK	3.02963	6.37314	1.07286	1.30779	0.0013	0.00199593	yes
XLOC_373732	XLOC_373732	NM_002104	GZMK	GZMK	5:54320106-54329960	PRE	POST	OK	6.81565	14.4041	1.07956	1.22621	0.00085	0.00175882	yes
XLOC_269730	XLOC_269730	NM_002466	MYBL2	MYBL2	20:42295708-42345150	PRE	POST	OK	3.41365	7.25238	1.08714	1.53235	0.0001	0.00175882	yes
XLOC_529231	XLOC_529231	NM_012310	KIF4A	KIF4A	X:69509878-69640774	PRE	POST	OK	0.588243	1.25287	1.09075	0.928636	0.0231	0.0276401	yes
XLOC_506851	XLOC_506851	NM_005384	NFIL3	NFIL3	9:94171326-94186144	PRE	POST	OK	0.930351	1.98342	1.09214	0.842909	0.01595	0.0190996	yes
XLOC_065873	XLOC_065873	NM_080668	CDCA5	CDCA5	11:64844926-64851615	PRE	POST	OK	1.57189	3.36655	1.09877	1.05078	0.00385	0.00468099	yes
XLOC_476641	XLOC_476641	NM_152562	CDCA2	CDCA2	8:25316512-25365425	PRE	POST	OK	0.787478	1.69986	1.1101	0.94849	0.0189	0.0226246	yes
XLOC_293418	XLOC_293418	NM_020242	KIF15	KIF15	3:44803208-44894748	PRE	POST	OK	1.48282	3.20417	1.11161	1.28602	0.00255	0.00319317	yes
XLOC_476693	XLOC_476693	NM_032336	GINS4	GINS4	8:41386724-41402565	PRE	POST	OK	0.728257	1.5765	1.11421	0.951932	0.0192	0.022983	yes
XLOC_269647	XLOC_269647	NM_012112	TPX2	TPX2	20:30326903-30389605	PRE	POST	OK	3.99205	8.64322	1.11444	1.78026	5e-05	0.00175882	yes
XLOC_171187	XLOC_171187	NM_020807	ZNF319	ZNF319	16:58010212-58055527	PRE	POST	OK	3.22195	6.99031	1.11742	1.26141	0.0079	0.00947879	yes
XLOC_294455	XLOC_294455	NM_199420	POLQ	POLQ	3:121150272-121265393	PRE	POST	OK	0.694625	1.52259	1.13222	1.35661	0.00185	0.00245971	yes
XLOC_413883	XLOC_413883	NM_003537	HIST1H3B	HIST1H3B	6:26031816-26032288	PRE	POST	OK	19.3915	44.3135	1.19233	1.4649	0.0008	0.00175882	yes
XLOC_000370	XLOC_000370	NM_006845	KIF2C	KIF2C	1:45205489-45233438	PRE	POST	OK	0.965195	2.22578	1.20542	1.02779	0.0125	0.0149774	yes
XLOC_476649	XLOC_476649	NM_001017420	ESCO2	ESCO2	8:27632052-27662424	PRE	POST	OK	2.45511	5.69084	1.21285	1.22692	0.00325	0.003961	yes
XLOC_170482	XLOC_170482	NM_005030	PLK1	PLK1	16:23690200-23724821	PRE	POST	OK	1.82425	4.32948	1.24689	1.21913	0.0031	0.00380915	yes
XLOC_170831	XLOC_170831	NM_030928	CDT1	CDT1	16:88870185-88875666	PRE	POST	OK	3.29684	7.94013	1.26808	1.78763	5e-05	0.00175882	yes
XLOC_171139	XLOC_171139	NM_024745	SHCBP1	SHCBP1	16:46614467-46655311	PRE	POST	OK	0.803385	1.98062	1.30179	1.05435	0.0031	0.00380915	yes
XLOC_156639	XLOC_156639	NM_012182	FOXB1	FOXB1	15:60296420-60298142	PRE	POST	OK	1.03605	2.57083	1.31115	0.892904	0.0311	0.0371855	yes
XLOC_222463	XLOC_222463	NM_005018	PDCD1	PDCD1	2:242792032-242801058	PRE	POST	OK	2.28073	5.66885	1.31356	1.48829	0.00035	0.00175882	yes
XLOC_196223	XLOC_196223	NM_020648	TWSG1	TWSG1	18:9334764-9402418	PRE	POST	OK	0.675646	1.73288	1.35883	0.72855	0.03875	0.0463015	yes
XLOC_449071	XLOC_449071	NM_017760	NCAPG2	NCAPG2	7:158424002-158497520	PRE	POST	OK	4.79737	12.553	1.38771	1.48344	0.0026	0.00325525	yes
XLOC_211560	XLOC_211560	NM_015073	SIPA1L3	SIPA1L3	19:38397857-38699008	PRE	POST	OK	5.96993	16.6388	1.47876	0.567943	0.0155	0.0185619	yes
XLOC_065318	XLOC_065318	NM_033390	ZC3H12C	ZC3H12C	11:109963532-110042873	PRE	POST	OK	0.593208	1.65681	1.4818	0.822458	0.03365	0.0402241	yes
XLOC_413897	XLOC_413897	NM_021018	HIST1H3F	HIST1H3F	6:26250369-26250835	PRE	POST	OK	17.7267	51.8685	1.54893	1.77813	5e-05	0.00175882	yes
XLOC_090915	XLOC_090915	NM_015409	EP400	EP400	12:132434464-132565619	PRE	POST	OK	10.0911	29.8174	1.56307	2.32858	5e-05	0.00175882	yes
XLOC_332190	XLOC_332190	NM_001039580	MAP9	MAP9	4:156263811-156298122	PRE	POST	OK	0.659827	1.96733	1.57608	0.874226	0.03415	0.0408196	yes
XLOC_116284	XLOC_116284	NM_206808	CLYBL	CLYBL	13:100258910-100549470	PRE	POST	OK	5.03048	16.1083	1.67904	1.26565	0.0053	0.00638485	yes
XLOC_222218	XLOC_222218	NM_178123	SESTD1	SESTD1	2:179966418-180129350	PRE	POST	OK	6.12058	21.4097	1.80652	1.75515	0.02265	0.0271031	yes
XLOC_529314	XLOC_529314	NR_038988	LOC100287765	LOC100287765	X:102024094-102140338	PRE	POST	OK	0.724022	2.87708	1.9905	1.00106	0.0185	0.0221469	yes
XLOC_116343	XLOC_116343	NM_174928	N6AMT2	N6AMT2	13:21303067-21348604	PRE	POST	OK	6.70706	39.6703	2.56431	3.69827	5e-05	0.00175882	yes
XLOC_042317	XLOC_042317	NM_014881	DCLRE1A	DCLRE1A	10:115594481-115673732	PRE	POST	OK	2.65331	15.6951	2.56445	2.55979	5e-05	0.00175882	yes
XLOC_331892	XLOC_331892	NM_003263	TLR1	TLR1	4:38796383-38806619	PRE	POST	OK	1.35407	8.29966	2.61575	1.71258	0.0214	0.0256107	yes
XLOC_506929	XLOC_506929	NM_005502	ABCA1	ABCA1	9:107543283-107690527	PRE	POST	OK	0.22646	2.41017	3.41181	1.6213	0.0015	0.00216967	yes
XLOC_212855	XLOC_212855	NM_130786	A1BG	A1BG	19:58858171-58874214	PRE	POST	OK	0.961939	27.7873	4.85234	2.8385	5e-05	0.00175882	yes
XLOC_288199	XLOC_288199	NR_030396	MIR659	MIR659	22:38243684-38245338	PRE	POST	OK	3.39669	120.785	5.15217	6.77095	5e-05	0.00175882	yes
XLOC_270181	XLOC_270181	NM_025224	ZBTB46	ZBTB46	20:62371210-62436942	PRE	POST	OK	0.295817	29.2306	6.62663	1.85217	0.00145	0.00216967	yes
XLOC_293519	XLOC_293519	NM_018398	CACNA2D3	CACNA2D3	3:54156692-55108584	PRE	POST	OK	0.0444696	110.9	11.2841	0.430506	0.0064	0.00769931	yes
XLOC_448503	XLOC_448503	NM_138426	GLCCI1	GLCCI1	7:7998203-8128711	PRE	POST	OK	8.00152	27578.9	11.751	5.58282	5e-05	0.00175882	yes
XLOC_001405	XLOC_001405	NR_027693	C1orf170	C1orf170	1:901876-917535	PRE	POST	OK	0.136396	17194.2	16.9438	1.98629	0.00195	0.00250218	yes

## Sheet: Relapse_Treg_PreVsPost
test_id	gene_id	gene	RefGene_name2	Gene	locus	sample_1	sample_2	status	value_1	value_2	log2(fold_change)	test_stat	p_value	q_value	significant
XLOC_217254	XLOC_217254	NM_001135825,NM_152267	RNF185,RNF185	RNF185	22:31556137-31603005	PRE	POST	OK	1979320	4.43339	-18.7682	-30.5606	5e-05	0.00343803	yes
XLOC_211763	XLOC_211763	NR_002776	MCM3AP-AS1	MCM3AP-AS1	21:47649147-47706190	PRE	POST	OK	220156	0.963219	-17.8022	-9.15769	0.0002	0.00343803	yes
XLOC_130970	XLOC_130970	NR_037158	LOC283888	LOC283888	16:27412614-27464828	PRE	POST	OK	7.58988	0.00890637	-9.73502	-0.124797	0.00975	0.0117791	yes
XLOC_221890	XLOC_221890	NM_005781	TNK2	TNK2	3:195587387-195640065	PRE	POST	OK	589.662	2.43764	-7.91826	-3.31588	0.0002	0.00343803	yes
XLOC_090288	XLOC_090288	NM_018283	NUDT15	NUDT15	13:48578437-48621792	PRE	POST	OK	501.04	2.18376	-7.84197	-3.53447	0.00535	0.00673969	yes
XLOC_335210	XLOC_335210	NM_001037132,NM_001193582,NM_001193583,NM_001193584,NM_005010	NRCAM,NRCAM,NRCAM,NRCAM,NRCAM	NRCAM	7:107788070-108096841	PRE	POST	OK	6.06585	0.0329539	-7.52412	-0.570624	0.0132	0.015866	yes
XLOC_356513	XLOC_356513	NM_001080431	SLC45A4	SLC45A4	8:142220869-142318429	PRE	POST	OK	199.039	2.74714	-6.17898	-6.64564	5e-05	0.00343803	yes
XLOC_120557	XLOC_120557	NR_003340	SNORD116-26	SNORD116-26	15:25338886-25367623	PRE	POST	OK	40.2864	1.35351	-4.89551	-2.35197	0.00075	0.00343803	yes
XLOC_221913	XLOC_221913	NM_001099952	ITPR1	ITPR1	3:4534986-4910480	PRE	POST	OK	445.534	16.7209	-4.73581	-4.16715	5e-05	0.00343803	yes
XLOC_377176	XLOC_377176	NM_000368,NM_001162426,NM_001162427	TSC1,TSC1,TSC1	TSC1	9:135766612-135820020	PRE	POST	OK	56.5477	2.26788	-4.64005	-8.19708	5e-05	0.00343803	yes
XLOC_376517	XLOC_376517	NM_003266,NM_138554,NM_138557	TLR4,TLR4,TLR4	TLR4	9:120466452-120479769	PRE	POST	OK	2.74473	0.138258	-4.31123	-1.23414	0.02895	0.0345745	yes
XLOC_120616	XLOC_120616	NM_001130414,NM_005503	APBA2,APBA2	APBA2	15:29131188-29410516	PRE	POST	OK	77.7129	4.55505	-4.09262	-5.20875	5e-05	0.00343803	yes
XLOC_222430	XLOC_222430	NM_001200047,NM_178177	NMNAT3,NMNAT3	NMNAT3	3:139279022-139396885	PRE	POST	OK	3.94903	0.274628	-3.84595	-1.19836	0.0138	0.0165787	yes
XLOC_161405	XLOC_161405	NM_021632	ZNF350	ZNF350	19:52467592-52490101	PRE	POST	OK	2180.23	178.41	-3.61121	-20.2893	5e-05	0.00343803	yes
XLOC_160335	XLOC_160335	NM_013361	ZNF223	ZNF223	19:44556163-44572142	PRE	POST	OK	1.21281	0.104434	-3.53768	-0.982045	0.0142	0.0170552	yes
XLOC_034413	XLOC_034413	NM_013451,NM_133337	MYOF,MYOF	MYOF	10:95066185-95242074	PRE	POST	OK	6.22678	0.539032	-3.53004	-2.70883	0.0052	0.00655597	yes
XLOC_000882	XLOC_000882	NR_001560	CYCSP52	CYCSP52	1:157094458-157109433	PRE	POST	OK	1.6682	0.145197	-3.52221	-0.532141	0.0272	0.0324925	yes
XLOC_355923	XLOC_355923	NR_038201,NR_038202,NR_038203,NR_038204,NR_038205,NR_038206,NR_038207,NR_038208,NR_038209	LOC100616530,LOC100616530,LOC100616530,LOC100616530,LOC100616530,LOC100616530,LOC100616530,LOC100616530,LOC100616530	LOC100616530	8:96257140-96822371	PRE	POST	OK	9.80373	0.87025	-3.49383	-1.30813	5e-05	0.00343803	yes
XLOC_334437	XLOC_334437	NM_021167	GATAD1	GATAD1	7:92076761-92092330	PRE	POST	OK	32.3997	3.2043	-3.3379	-4.26711	5e-05	0.00343803	yes
XLOC_001983	XLOC_001983	NM_005399	PRKAB2	PRKAB2	1:146626684-146644129	PRE	POST	OK	14.3373	1.62247	-3.14351	-3.42172	0.00015	0.00343803	yes
XLOC_248823	XLOC_248823	NM_001083,NM_033430,NM_033437	PDE5A,PDE5A,PDE5A	PDE5A	4:120375937-120549981	PRE	POST	OK	3.23888	0.36785	-3.1383	-1.73435	0.00245	0.00380506	yes
XLOC_070857	XLOC_070857	NM_001114182,NM_001145256,NM_001145257,NM_001145258,NM_016123	IRAK4,IRAK4,IRAK4,IRAK4,IRAK4	IRAK4	12:44152691-44183366	PRE	POST	OK	30.0069	5.45104	-2.46069	-2.1626	0.00055	0.00343803	yes
XLOC_393507	XLOC_393507	NR_026595	LINC00246A	LINC00246A	X:72158002-72163604	PRE	POST	OK	6.11712	1.1252	-2.44267	-1.88096	0.00025	0.00343803	yes
XLOC_130829	XLOC_130829	NR_002736	SNORD60	SNORD60	16:2204213-2205517	PRE	POST	OK	1460.63	284.55	-2.35984	-28.4288	0.02925	0.0349317	yes
XLOC_222330	XLOC_222330	NM_199420	POLQ	POLQ	3:121150272-121264853	PRE	POST	OK	4.60886	0.899185	-2.35772	-2.05682	0.03645	0.0434874	yes
XLOC_376420	XLOC_376420	NM_194320	ZNF169	ZNF169	9:97021577-97065291	PRE	POST	OK	9.58874	2.04254	-2.23097	-1.08404	0.01815	0.0217495	yes
XLOC_106418	XLOC_106418	NM_152307	TRMT61A	TRMT61A	14:103995508-104003590	PRE	POST	OK	3.498	0.789867	-2.14685	-1.44935	0.00575	0.00706202	yes
XLOC_211757	XLOC_211757	NM_030582,NM_130445	COL18A1,COL18A1	COL18A1	21:46825096-46933634	PRE	POST	OK	2.081	0.480026	-2.11609	-0.917128	0.0331	0.0395041	yes
XLOC_001880	XLOC_001880	NM_001048210,NM_015127	CLCC1,CLCC1	CLCC1	1:109419602-109506111	PRE	POST	OK	21.4085	5.15379	-2.05448	-1.70743	0.00715	0.00871832	yes
XLOC_160875	XLOC_160875	NM_007065	CDC37	CDC37	19:10501808-10514271	PRE	POST	OK	181.69	45.6544	-1.99266	-5.12276	5e-05	0.00343803	yes
XLOC_001214	XLOC_001214	NM_001003665	C1orf95	C1orf95	1:226736500-226796915	PRE	POST	OK	0.787346	0.206166	-1.93319	-0.928787	0.03165	0.0377792	yes
XLOC_106187	XLOC_106187	NM_015556	SIPA1L1	SIPA1L1	14:71867527-72207840	PRE	POST	OK	91.6718	26.4337	-1.7941	-1.57261	0.0078	0.00948942	yes
XLOC_376198	XLOC_376198	NM_001256876,NM_001256877,NM_015158,NM_153186	KANK1,KANK1,KANK1,KANK1	KANK1	9:470293-746106	PRE	POST	OK	6.25048	1.93515	-1.69152	-1.38725	0.028	0.0334442	yes
XLOC_161418	XLOC_161418	NM_207333	ZNF320	ZNF320	19:53379424-53400939	PRE	POST	OK	1.9085	0.6387	-1.57923	-0.933794	0.02685	0.0320766	yes
XLOC_376878	XLOC_376878	NR_003670	KGFLP2	KGFLP2	9:41958801-42019584	PRE	POST	OK	0.833348	0.283826	-1.55391	-0.920533	0.02865	0.0342178	yes
XLOC_168477	XLOC_168477	NM_178123	SESTD1	SESTD1	2:179966418-180129350	PRE	POST	OK	2.63658	0.993326	-1.40833	-1.23743	0.00555	0.00698597	yes
XLOC_159972	XLOC_159972	NM_001080503	CCDC159	CCDC159	19:11457180-11465786	PRE	POST	OK	10.9538	4.18533	-1.38802	-1.17323	0.0101	0.0121942	yes
XLOC_167389	XLOC_167389	NR_015424	ANKRD36BP2	ANKRD36BP2	2:89065418-89106109	PRE	POST	OK	1.62779	0.626471	-1.37759	-0.921882	0.0289	0.0345152	yes
XLOC_168428	XLOC_168428	NM_004482	GALNT3	GALNT3	2:166604312-166650803	PRE	POST	OK	1.80664	0.713086	-1.34116	-0.867923	0.0419	0.0499695	yes
XLOC_222432	XLOC_222432	NM_001039547	GK5	GK5	3:141876368-141944449	PRE	POST	OK	1.88519	0.767598	-1.29629	-0.868773	0.03825	0.0456288	yes
XLOC_053478	XLOC_053478	NM_001007232	CARD17	CARD17	11:104962772-104972177	PRE	POST	OK	35.9897	14.8706	-1.27512	-1.80518	0.0134	0.016102	yes
XLOC_159977	XLOC_159977	NM_145295	ZNF627	ZNF627	19:11708234-11729974	PRE	POST	OK	2.01149	0.841333	-1.25751	-0.993102	0.0085	0.0103307	yes
XLOC_148779	XLOC_148779	NM_001093729,NM_024781	CCDC102B,CCDC102B	CCDC102B	18:66382490-66722426	PRE	POST	OK	1.57177	0.709726	-1.14706	-0.865923	0.0282	0.0336821	yes
XLOC_053005	XLOC_053005	NM_001135109,NM_001206671,NM_001206672,NM_024557	RIC3,RIC3,RIC3,RIC3	RIC3	11:8060179-8190590	PRE	POST	OK	7.6127	3.45958	-1.13781	-1.00895	0.0052	0.00655597	yes
XLOC_222037	XLOC_222037	NM_001135179,NM_016598	ZDHHC3,ZDHHC3	ZDHHC3	3:44956665-45017674	PRE	POST	OK	4.69823	2.19213	-1.09978	-0.69394	0.034	0.0405734	yes
XLOC_052641	XLOC_052641	NM_003369	UVRAG	UVRAG	11:75526211-75855282	PRE	POST	OK	9.33934	4.43636	-1.07394	-0.956091	0.0223	0.0266789	yes
XLOC_393314	XLOC_393314	NM_002641,NM_020473	PIGA,PIGA	PIGA	X:15337572-15354249	PRE	POST	OK	22.9636	11.1048	-1.04816	-1.59933	0.0002	0.00343803	yes
XLOC_356346	XLOC_356346	NM_001001481,NM_001271015,NM_018299	UBE2W,,UBE2W	UBE2W	8:74692331-74791145	PRE	POST	OK	3.13143	1.52054	-1.04223	-0.913673	0.0112	0.0135059	yes
XLOC_308702	XLOC_308702	NM_001135564,NM_001243094,NM_004506	HSF2,HSF2,HSF2	HSF2	6:122720695-122754264	PRE	POST	OK	8.49073	4.17729	-1.02332	-1.06516	0.0153	0.0183591	yes
XLOC_071492	XLOC_071492	NM_001242397,NM_002822	TWF1,TWF1	TWF1	12:44187525-44200178	PRE	POST	OK	22.3635	11.0115	-1.02213	-0.831532	0.02175	0.0260233	yes
XLOC_335008	XLOC_335008	NM_016038	SBDS	SBDS	7:66448567-66461584	PRE	POST	OK	24.2148	12.0207	-1.01037	-1.40387	0.00195	0.00343803	yes
XLOC_334959	XLOC_334959	NR_003697	SNHG15	SNHG15	7:45021393-45026279	PRE	POST	OK	20.2751	10.0738	-1.0091	-1.1281	0.00815	0.00991031	yes
XLOC_053617	XLOC_053617	NM_001142685,NM_014715	ARHGAP32,ARHGAP32	ARHGAP32	11:128834954-129062093	PRE	POST	OK	2.29147	1.14031	-1.00685	-0.621103	0.0291	0.0347532	yes
XLOC_071798	XLOC_071798	NM_006825	CKAP4	CKAP4	12:106631658-106641713	PRE	POST	OK	8.24947	4.10529	-1.00682	-1.47132	0.00025	0.00343803	yes
XLOC_221865	XLOC_221865	NM_001167671,NM_001167672,NM_005578	LPP,LPP,LPP	LPP	3:187868993-188608460	PRE	POST	OK	9.14081	4.55919	-1.00355	-0.870428	0.0304	0.0363008	yes
XLOC_392922	XLOC_392922	NM_001005332,NM_001005333,NM_006986	MAGED1,MAGED1,MAGED1	MAGED1	X:51546116-51645453	PRE	POST	OK	18.9254	9.50604	-0.993409	-1.40663	0.00435	0.00568523	yes
XLOC_355885	XLOC_355885	NM_001105539,NM_023929	ZBTB10,ZBTB10	ZBTB10	8:81398394-81435333	PRE	POST	OK	7.59737	3.87494	-0.971326	-1.20852	0.00495	0.00624998	yes
XLOC_000471	XLOC_000471	NM_001190987,NM_004768	SRSF11,SRSF11	SRSF11	1:70671364-70718862	PRE	POST	OK	42.0554	21.6566	-0.957484	-0.761777	0.01745	0.0209146	yes
XLOC_161505	XLOC_161505	NM_005773	ZNF256	ZNF256	19:58452030-58459162	PRE	POST	OK	4.0607	2.10693	-0.946586	-1.01313	0.0197	0.023582	yes
XLOC_140881	XLOC_140881	NM_144606,NM_144997	FLCN,FLCN	FLCN	17:17115526-17140717	PRE	POST	OK	11.8927	6.31845	-0.912428	-0.781195	0.04165	0.0496731	yes
XLOC_168380	XLOC_168380	NM_001008540,NM_003467	CXCR4,CXCR4	CXCR4	2:136870730-136875774	PRE	POST	OK	291.878	155.158	-0.911624	-1.56626	0.0002	0.00343803	yes
XLOC_217369	XLOC_217369	NM_001003828,NM_001243385,NM_001243386,NM_013327	PARVB,PARVB,PARVB,PARVB	PARVB	22:44395090-44565263	PRE	POST	OK	7.43565	3.95803	-0.909677	-1.02278	0.0279	0.0333254	yes
XLOC_393793	XLOC_393793	NM_001166460,NM_001166461,NM_001166462,NM_002436	MPP1,MPP1,MPP1,MPP1	MPP1	X:154006843-154033802	PRE	POST	OK	3.8141	2.033	-0.907732	-0.858076	0.04	0.0477107	yes
XLOC_278281	XLOC_278281	NM_001242466,NM_181504,NM_181523,NM_181524	PIK3R1,PIK3R1,PIK3R1,PIK3R1	PIK3R1	5:67511583-67597766	PRE	POST	OK	126.98	67.8203	-0.904812	-1.51384	0.00025	0.00343803	yes
XLOC_204224	XLOC_204224	NM_013248	NXT1	NXT1	20:23329563-23335585	PRE	POST	OK	9.97499	5.34402	-0.90039	-1.03574	0.0115	0.0138637	yes
XLOC_052759	XLOC_052759	NM_016090	RBM7	RBM7	11:114271255-114281782	PRE	POST	OK	22.7681	12.2454	-0.894774	-1.23727	0.00355	0.00488826	yes
XLOC_071021	XLOC_071021	NM_033276	XRCC6BP1	XRCC6BP1	12:58335444-58351052	PRE	POST	OK	5.08367	2.75406	-0.88431	-0.809027	0.0373	0.044499	yes
XLOC_106655	XLOC_106655	NM_001008726,NM_001258272,NM_080666	WDR89,,WDR89	WDR89	14:64063756-64108641	PRE	POST	OK	9.72268	5.28838	-0.878528	-0.818111	0.0229	0.0273932	yes
XLOC_090403	XLOC_090403	NM_003749	IRS2	IRS2	13:110404999-110438914	PRE	POST	OK	12.0522	6.69742	-0.847624	-1.55371	0.0006	0.00343803	yes
XLOC_393361	XLOC_393361	NM_006520	DYNLT3	DYNLT3	X:37698088-37706889	PRE	POST	OK	14.8093	8.26652	-0.841147	-1.05616	0.00575	0.00706202	yes
XLOC_356196	XLOC_356196	NM_006158	NEFL	NEFL	8:24808468-24814131	PRE	POST	OK	2.86955	1.6097	-0.834032	-0.931188	0.02975	0.0355272	yes
XLOC_160347	XLOC_160347	NM_005178	BCL3	BCL3	19:45251977-45263301	PRE	POST	OK	29.4317	16.6785	-0.819377	-1.34948	0.00125	0.00343803	yes
XLOC_204513	XLOC_204513	NM_014731	ProSAPiP1	ProSAPiP1	20:3143272-3149207	PRE	POST	OK	2.04194	1.16411	-0.810714	-0.917999	0.03385	0.0403951	yes
XLOC_221532	XLOC_221532	NM_005290	GPR15	GPR15	3:98250788-98253527	PRE	POST	OK	12.7662	7.32536	-0.801362	-0.924301	0.0219	0.0262016	yes
XLOC_052289	XLOC_052289	NM_001113528,NM_152636	METTL15,METTL15	METTL15	11:28129797-28355124	PRE	POST	OK	5.2232	3.00018	-0.799884	-0.811476	0.03905	0.0465802	yes
XLOC_211888	XLOC_211888	NM_001098402,NM_001098403,NM_020727	ZNF295,ZNF295,ZNF295	ZNF295	21:43406521-43430496	PRE	POST	OK	13.2167	7.6013	-0.798048	-1.39931	0.00095	0.00343803	yes
XLOC_160078	XLOC_160078	NM_001025604,NM_015683	ARRDC2,ARRDC2	ARRDC2	19:18111943-18124937	PRE	POST	OK	15.3881	8.91104	-0.788149	-1.13813	0.00375	0.00506434	yes
XLOC_309525	XLOC_309525	NM_006519	DYNLT1	DYNLT1	6:159057417-159066978	PRE	POST	OK	50.1769	29.1256	-0.784733	-1.05433	0.014	0.016817	yes
XLOC_334778	XLOC_334778	NM_182491	ZFAND2A	ZFAND2A	7:1192518-1199890	PRE	POST	OK	25.1363	14.78	-0.76613	-1.08397	0.0094	0.0113629	yes
XLOC_159989	XLOC_159989	NM_003437	ZNF136	ZNF136	19:12273831-12300064	PRE	POST	OK	4.76072	2.80818	-0.761542	-0.933405	0.032	0.0381959	yes
XLOC_167186	XLOC_167186	NM_001127399,NM_001127400,NM_001127401,NM_016061	YPEL5,YPEL5,YPEL5,YPEL5	YPEL5	2:30369734-30393446	PRE	POST	OK	213.907	126.987	-0.752308	-1.11117	0.0092	0.0111281	yes
XLOC_334360	XLOC_334360	NR_001588,NR_024109,NR_024110,NR_024111	SBDSP1,SBDSP1,SBDSP1,SBDSP1	SBDSP1	7:72299119-72308371	PRE	POST	OK	21.1177	12.616	-0.743199	-1.07524	0.0136	0.0163407	yes
XLOC_204180	XLOC_204180	NR_029405	LOC643406	LOC643406	20:5451841-5457780	PRE	POST	OK	2.90899	1.74029	-0.741189	-0.890989	0.0287	0.0342774	yes
XLOC_090179	XLOC_090179	NR_027995	ANKRD20A9P	ANKRD20A9P	13:19408542-19446109	PRE	POST	OK	1.16972	0.702447	-0.735702	-1.04198	0.01	0.0120749	yes
XLOC_071446	XLOC_071446	NM_005691,NM_020297	ABCC9,ABCC9	ABCC9	12:21950323-22089628	PRE	POST	OK	9.95629	6.04811	-0.719125	-1.05429	0.00645	0.00790143	yes
XLOC_106790	XLOC_106790	NM_022151	MOAP1	MOAP1	14:93648540-93651249	PRE	POST	OK	15.0279	9.18949	-0.709591	-1.06913	0.00725	0.00883814	yes
XLOC_090380	XLOC_090380	NM_004951	GPR183	GPR183	13:99848529-100058554	PRE	POST	OK	139.308	85.5762	-0.702992	-1.03541	0.01335	0.0160449	yes
XLOC_204412	XLOC_204412	NM_017495,NM_183425	RBM38,RBM38	RBM38	20:55904830-55998278	PRE	POST	OK	115.284	71.2919	-0.693383	-1.25755	0.0026	0.00389388	yes
XLOC_130390	XLOC_130390	NM_001145204,NM_001145205	SHISA9,SHISA9	SHISA9	16:12995476-13334273	PRE	POST	OK	8.03599	4.99382	-0.686332	-1.05186	0.00965	0.0116596	yes
XLOC_355922	XLOC_355922	NM_024613	PLEKHF2	PLEKHF2	8:96145927-96169747	PRE	POST	OK	8.27495	5.15548	-0.682644	-0.872853	0.0379	0.0452124	yes
XLOC_334396	XLOC_334396	NM_001040456,NM_001040457	RHBDD2,RHBDD2	RHBDD2	7:75508290-75518870	PRE	POST	OK	45.9699	28.7219	-0.678536	-1.16733	0.0047	0.0060088	yes
XLOC_248037	XLOC_248037	NR_003132	HSP90AB2P	HSP90AB2P	4:13335036-13339925	PRE	POST	OK	37.1112	23.3901	-0.665955	-1.11481	0.0066	0.00808343	yes
XLOC_392958	XLOC_392958	NM_007157	ZXDB	ZXDB	X:57618165-57624853	PRE	POST	OK	4.06142	2.56989	-0.660277	-0.90498	0.029	0.0346341	yes
XLOC_071379	XLOC_071379	NM_001781	CD69	CD69	12:9905081-9913497	PRE	POST	OK	211.187	134.258	-0.653514	-1.16066	0.00385	0.00512921	yes
XLOC_141347	XLOC_141347	NM_005324	H3F3B	H3F3B	17:73771352-73776034	PRE	POST	OK	421.731	269.167	-0.647822	-1.10663	0.0084	0.0102106	yes
XLOC_070771	XLOC_070771	NM_031412	GABARAPL1	GABARAPL1	12:10365488-10375724	PRE	POST	OK	9.11876	5.83564	-0.643946	-0.831528	0.0384	0.0458069	yes
XLOC_160895	XLOC_160895	NM_032377	ELOF1	ELOF1	19:11663857-11670051	PRE	POST	OK	35.503	22.9011	-0.63252	-1.04146	0.0344	0.0410497	yes
XLOC_001805	XLOC_001805	NM_004388	CTBS	CTBS	1:85018574-85040163	PRE	POST	OK	11.1824	7.23405	-0.628355	-0.836033	0.0376	0.0448556	yes
XLOC_160658	XLOC_160658	NM_001023563,NM_001145078	ZNF805,ZNF805	ZNF805	19:57752052-57774106	PRE	POST	OK	5.1158	3.32754	-0.620502	-0.948245	0.02165	0.0259051	yes
XLOC_090297	XLOC_090297	NM_001268	RCBTB2	RCBTB2	13:49063093-49108300	PRE	POST	OK	19.9741	12.997	-0.619959	-0.880675	0.04175	0.0497916	yes
XLOC_278640	XLOC_278640	NM_001168393,NM_001168394,NM_153607	CREBRF,CREBRF,CREBRF	CREBRF	5:172482228-172566291	PRE	POST	OK	37.9451	24.7496	-0.616509	-0.999847	0.0149	0.0178873	yes
XLOC_167408	XLOC_167408	NM_212481	ARID5A	ARID5A	2:97202389-97218373	PRE	POST	OK	28.4297	18.5797	-0.613671	-0.980405	0.01275	0.0153303	yes
XLOC_335218	XLOC_335218	NM_152556	C7orf60	C7orf60	7:112459201-112579932	PRE	POST	OK	14.4037	9.43159	-0.610864	-0.926684	0.01735	0.0207955	yes
XLOC_160958	XLOC_160958	NM_014371	AKAP8L	AKAP8L	19:15490858-15529845	PRE	POST	OK	33.8415	22.2629	-0.604157	-0.945482	0.0247	0.0295379	yes
XLOC_130951	XLOC_130951	NM_001802	CDR2	CDR2	16:22353852-22386145	PRE	POST	OK	13.2314	8.77076	-0.593195	-0.967043	0.02045	0.0244757	yes
XLOC_248078	XLOC_248078	NM_016531	KLF3	KLF3	4:38609720-38703129	PRE	POST	OK	48.4155	32.1198	-0.592008	-0.945029	0.0269	0.0321359	yes
XLOC_001052	XLOC_001052	NM_002922	RGS1	RGS1	1:192544535-192551131	PRE	POST	OK	409.396	271.81	-0.590899	-0.90151	0.0302	0.0360627	yes
XLOC_000460	XLOC_000460	NM_001037339,NM_001037340,NM_001037341,NM_002600	PDE4B,PDE4B,PDE4B,PDE4B	PDE4B	1:66258192-66843692	PRE	POST	OK	49.7954	33.0738	-0.590322	-1.01964	0.01635	0.0196007	yes
XLOC_000591	XLOC_000591	NM_001400	S1PR1	S1PR1	1:101700161-101709453	PRE	POST	OK	68.9609	46.5781	-0.566125	-0.978027	0.01905	0.0228224	yes
XLOC_355986	XLOC_355986	NM_007218	RNF139	RNF139	8:125487007-125551329	PRE	POST	OK	50.0447	33.81	-0.565767	-0.868383	0.03305	0.0394448	yes
XLOC_221549	XLOC_221549	NM_017819	RG9MTD1	RG9MTD1	3:101280711-101285089	PRE	POST	OK	24.0624	16.2591	-0.565534	-0.902304	0.02235	0.0267382	yes
XLOC_167177	XLOC_167177	NM_005253	FOSL2	FOSL2	2:28615610-28640021	PRE	POST	OK	18.8643	12.8194	-0.557332	-0.913187	0.0303	0.0361818	yes
XLOC_160247	XLOC_160247	NM_003407	ZFP36	ZFP36	19:39897486-39900052	PRE	POST	OK	413.701	281.68	-0.554533	-0.908647	0.02025	0.0242369	yes
XLOC_392880	XLOC_392880	NM_006743	RBM3	RBM3	X:48432740-48439553	PRE	POST	OK	70.1877	48.0378	-0.547049	-0.987296	0.01485	0.0178273	yes
XLOC_376364	XLOC_376364	NM_000700	ANXA1	ANXA1	9:75766666-75785322	PRE	POST	OK	51.3942	35.2364	-0.544537	-0.900794	0.03115	0.037183	yes
XLOC_393480	XLOC_393480	NM_002547	OPHN1	OPHN1	X:67262185-67653299	PRE	POST	OK	4.90401	3.3631	-0.544168	-0.81002	0.0356	0.042477	yes
XLOC_167575	XLOC_167575	NM_015630	EPC2	EPC2	2:149402315-149546652	PRE	POST	OK	25.655	17.6233	-0.541755	-0.831532	0.04175	0.0497916	yes
XLOC_034007	XLOC_034007	NM_001008541,NM_005962,NM_130439	MXI1,MXI1,MXI1	MXI1	10:111966925-112047123	PRE	POST	OK	27.0092	18.5614	-0.541149	-0.922266	0.0271	0.0323735	yes
XLOC_308582	XLOC_308582	NM_003463	PTP4A1	PTP4A1	6:64281534-64297615	PRE	POST	OK	74.2525	51.6076	-0.524856	-0.911057	0.02645	0.0316001	yes
XLOC_141388	XLOC_141388	NM_003655	CBX4	CBX4	17:77806954-77813213	PRE	POST	OK	19.1712	13.4245	-0.514077	-1.07201	0.0187	0.0224047	yes
XLOC_106562	XLOC_106562	NM_020529	NFKBIA	NFKBIA	14:35865829-35874379	PRE	POST	OK	106.789	74.8691	-0.512321	-0.923774	0.0316	0.0377196	yes
XLOC_334538	XLOC_334538	NM_012328	DNAJB9	DNAJB9	7:108210183-108215295	PRE	POST	OK	51.9361	36.5055	-0.508627	-0.895286	0.0328	0.0391472	yes
XLOC_248695	XLOC_248695	NM_012297,NM_203504,NM_203505	G3BP2,G3BP2,G3BP2	G3BP2	4:76567596-76598667	PRE	POST	OK	38.2557	26.9134	-0.507349	-0.859408	0.0407	0.0485422	yes
XLOC_160401	XLOC_160401	NM_015710	GLTSCR2	GLTSCR2	19:48248788-48262045	PRE	POST	OK	262.505	187.172	-0.487984	-0.880623	0.0391	0.0466396	yes
XLOC_168514	XLOC_168514	NM_004226	STK17B	STK17B	2:196997252-197036339	PRE	POST	OK	131.936	94.7953	-0.476956	-0.864484	0.03585	0.0427739	yes
XLOC_090041	XLOC_090041	NM_021999	ITM2B	ITM2B	13:48807273-48836232	PRE	POST	OK	168.66	122.634	-0.459759	-0.874155	0.0309	0.0368857	yes
XLOC_247990	XLOC_247990	NM_033296	MRFAP1	MRFAP1	4:6642393-6644465	PRE	POST	OK	100.541	73.627	-0.449478	-0.843839	0.03955	0.0471754	yes
XLOC_167362	XLOC_167362	NM_005911	MAT2A	MAT2A	2:85766100-85788657	PRE	POST	OK	81.5379	114.041	0.484006	0.849394	0.04055	0.048364	yes
XLOC_204530	XLOC_204530	NM_002592,NM_182649	PCNA,PCNA	PCNA	20:5095598-5107268	PRE	POST	OK	42.0899	59.062	0.488754	0.836808	0.04005	0.0477698	yes
XLOC_356347	XLOC_356347	NM_001204857,NM_001204858,NM_001204859,NM_001204860,NM_001204861,NM_001204862,NM_001204863,NM_001204864,NM_005648	TCEB1,TCEB1,TCEB1,TCEB1,TCEB1,TCEB1,TCEB1,TCEB1,TCEB1	TCEB1	8:74857372-74884522	PRE	POST	OK	40.1171	56.3084	0.489132	0.893997	0.0406	0.0484235	yes
XLOC_376844	XLOC_376844	NM_014450	SIT1	SIT1	9:35649296-35650947	PRE	POST	OK	37.0428	52.0061	0.489487	0.873926	0.03295	0.0393256	yes
XLOC_167711	XLOC_167711	NM_001257102,NM_002491	NDUFB3,NDUFB3	NDUFB3	2:201936461-201950473	PRE	POST	OK	146.152	206.871	0.501259	0.903059	0.0286	0.0341582	yes
XLOC_204805	XLOC_204805	NM_001039467,NM_005873	RGS19,RGS19	RGS19	20:62704143-62711324	PRE	POST	OK	28.2282	40.0258	0.503795	0.915312	0.03105	0.0370642	yes
XLOC_376804	XLOC_376804	NM_014314	DDX58	DDX58	9:32455177-32526332	PRE	POST	OK	7.2161	10.3754	0.523876	0.867316	0.03775	0.045034	yes
XLOC_168034	XLOC_168034	NM_001270436,NM_001270437,NM_001270438,NM_006449	,,,CDC42EP3	CDC42EP3	2:37869024-37899678	PRE	POST	OK	7.09122	10.2406	0.530197	0.835243	0.0361	0.0430712	yes
XLOC_334153	XLOC_334153	NM_001040167,NM_001040168,NM_001166355,NM_002304	LFNG,LFNG,LFNG,LFNG	LFNG	7:2552162-2569882	PRE	POST	OK	15.513	22.5833	0.541776	0.814433	0.04115	0.0490775	yes
XLOC_130946	XLOC_130946	NM_130464	NPIPL3	NPIPL3	16:21413454-21449631	PRE	POST	OK	29.7744	43.3526	0.542049	0.939521	0.0253	0.0302542	yes
XLOC_356367	XLOC_356367	NM_001099670,NM_001099671,NM_001099672,NM_001099673	C8orf59,C8orf59,C8orf59,C8orf59	C8orf59	8:86089618-86132643	PRE	POST	OK	56.0543	82.0157	0.549076	0.922116	0.02975	0.0355272	yes
XLOC_334733	XLOC_334733	NM_018326	GIMAP4	GIMAP4	7:150264298-150278061	PRE	POST	OK	73.2077	107.279	0.551294	1.03039	0.01515	0.0181812	yes
XLOC_278188	XLOC_278188	NM_012073	CCT5	CCT5	5:10250281-10266501	PRE	POST	OK	10.1433	14.912	0.555942	0.93686	0.02225	0.0266192	yes
XLOC_131005	XLOC_131005	NM_024096	DCTPP1	DCTPP1	16:30435018-30441373	PRE	POST	OK	32.9508	48.5255	0.558428	0.90822	0.02685	0.0320766	yes
XLOC_222459	XLOC_222459	NM_013308	GPR171	GPR171	3:150804675-151176497	PRE	POST	OK	45.4482	67.2651	0.565636	0.939865	0.0219	0.0262016	yes
XLOC_334732	XLOC_334732	NM_153236	GIMAP7	GIMAP7	7:150211944-150218161	PRE	POST	OK	100.518	148.836	0.566269	1.09806	0.0103	0.0124317	yes
XLOC_090125	XLOC_090125	NM_021033	RAP2A	RAP2A	13:98086474-98120252	PRE	POST	OK	13.0817	19.3725	0.566461	0.988768	0.0171	0.0204964	yes
XLOC_034501	XLOC_034501	NM_015916	CALHM2	CALHM2	10:105206181-105212184	PRE	POST	OK	12.4079	18.3893	0.567604	0.799652	0.0419	0.0499695	yes
XLOC_130571	XLOC_130571	NM_005953	MT2A	MT2A	16:56642477-56643409	PRE	POST	OK	57.1741	85.3526	0.578073	0.82827	0.03665	0.0437255	yes
XLOC_120774	XLOC_120774	NM_182703	ANKDD1A	ANKDD1A	15:65204100-65251053	PRE	POST	OK	50.0342	75.4004	0.591658	0.969394	0.01375	0.0165191	yes
XLOC_034549	XLOC_034549	NM_006793,NM_014098	PRDX3,PRDX3	PRDX3	10:120927210-120938345	PRE	POST	OK	21.8604	32.9496	0.591939	0.854419	0.03995	0.0476512	yes
XLOC_222539	XLOC_222539	NM_014398	LAMP3	LAMP3	3:182840002-182880667	PRE	POST	OK	5.43979	8.20328	0.592649	0.844315	0.0416	0.0496136	yes
XLOC_000009	XLOC_000009	NM_005101	ISG15	ISG15	1:948846-949919	PRE	POST	OK	93.2984	140.787	0.593594	0.920626	0.02265	0.0270953	yes
XLOC_140062	XLOC_140062	NM_017523,NM_199139	XAF1,XAF1	XAF1	17:6659155-6678968	PRE	POST	OK	32.2947	48.8298	0.596463	0.996313	0.0231	0.0276312	yes
XLOC_222524	XLOC_222524	NM_001190942,NM_001190943,NM_003810	TNFSF10,TNFSF10,TNFSF10	TNFSF10	3:172223297-172241450	PRE	POST	OK	24.8211	38.01	0.614811	1.10445	0.0104	0.0125513	yes
XLOC_376469	XLOC_376469	NM_019592	RNF20	RNF20	9:104296114-104500862	PRE	POST	OK	12.9732	20.1257	0.633498	0.742978	0.03245	0.0387308	yes
XLOC_033915	XLOC_033915	NM_018063	HELLS	HELLS	10:96305425-96362394	PRE	POST	OK	5.59647	8.73081	0.6416	0.90721	0.0312	0.0372426	yes
XLOC_217310	XLOC_217310	NM_152426	APOBEC3D	APOBEC3D	22:39417117-39430220	PRE	POST	OK	10.8886	17.0588	0.647697	1.02636	0.01295	0.0155674	yes
XLOC_053543	XLOC_053543	NM_001098526,NM_153206	AMICA1,AMICA1	AMICA1	11:118064441-118096287	PRE	POST	OK	6.92544	10.8996	0.654297	0.925492	0.02995	0.0357651	yes
XLOC_309431	XLOC_309431	NM_001017373,NM_001258275	SAMD3,	SAMD3	6:130464966-130686570	PRE	POST	OK	17.7519	28.1169	0.663462	1.05227	0.01205	0.0145183	yes
XLOC_121302	XLOC_121302	NM_015154	MESDC2	MESDC2	15:81244325-81282211	PRE	POST	OK	16.5868	26.2753	0.663673	0.968417	0.01655	0.0198395	yes
XLOC_308757	XLOC_308757	NM_016485	VTA1	VTA1	6:142468409-142542085	PRE	POST	OK	7.03978	11.1885	0.668409	1.0076	0.0171	0.0204964	yes
XLOC_002043	XLOC_002043	NM_005620	S100A11	S100A11	1:152004981-152009511	PRE	POST	OK	381.266	610.458	0.679095	1.24401	0.0025	0.00387995	yes
XLOC_140605	XLOC_140605	NM_004252	SLC9A3R1	SLC9A3R1	17:72744750-72765772	PRE	POST	OK	78.4933	127.079	0.69508	1.39668	0.0024	0.00375802	yes
XLOC_140392	XLOC_140392	NM_005533	IFI35	IFI35	17:41158741-41166476	PRE	POST	OK	6.6886	10.8632	0.699677	0.884621	0.03085	0.0368263	yes
XLOC_141031	XLOC_141031	NM_001067	TOP2A	TOP2A	17:38544768-38574246	PRE	POST	OK	4.96258	8.09619	0.706151	0.969684	0.01295	0.0155674	yes
XLOC_167103	XLOC_167103	NM_001165931	RRM2	RRM2	2:10262694-10271546	PRE	POST	OK	14.6193	23.8718	0.707434	1.08015	0.0086	0.0104264	yes
XLOC_071809	XLOC_071809	NM_014325	CORO1C	CORO1C	12:109038826-109125295	PRE	POST	OK	5.21989	8.53834	0.709935	1.03231	0.0152	0.0182408	yes
XLOC_217200	XLOC_217200	NM_000675	ADORA2A	ADORA2A	22:24823529-24890783	PRE	POST	OK	3.07301	5.10867	0.733295	0.894479	0.0332	0.0396225	yes
XLOC_377067	XLOC_377067	NM_031219	HDHD3	HDHD3	9:116135697-116138341	PRE	POST	OK	3.98686	6.66192	0.740685	0.782142	0.039	0.0465207	yes
XLOC_052658	XLOC_052658	NM_001193537,NM_001193538,NM_001256546,NM_001256547,NM_018480	TMEM126B,TMEM126B,TMEM126B,TMEM126B,TMEM126B	TMEM126B	11:85339616-85347583	PRE	POST	OK	27.5446	46.1336	0.744047	1.13285	0.0067	0.00820441	yes
XLOC_053431	XLOC_053431	NM_001144073,NM_012124	CHORDC1,CHORDC1	CHORDC1	11:89933435-89956549	PRE	POST	OK	8.42994	14.2042	0.752719	1.01994	0.02355	0.0281667	yes
XLOC_001824	XLOC_001824	NM_002053	GBP1	GBP1	1:89517837-89531043	PRE	POST	OK	26.3839	44.4827	0.753587	1.20716	0.0031	0.00443017	yes
XLOC_248411	XLOC_248411	NM_001243372,NM_001243374,NM_001829,NM_173872	CLCN3,CLCN3,CLCN3,CLCN3	CLCN3	4:170539331-170644421	PRE	POST	OK	4.71945	8.11585	0.782122	1.34512	0.00145	0.00343803	yes
XLOC_070719	XLOC_070719	NM_002824	PTMS	PTMS	12:6875540-6880118	PRE	POST	OK	6.51962	11.326	0.79678	0.984275	0.0194	0.0232393	yes
XLOC_001887	XLOC_001887	NM_001199772,NM_001199773,NM_001199774,NM_002790	PSMA5,PSMA5,PSMA5,PSMA5	PSMA5	1:109941652-109969108	PRE	POST	OK	6.92542	12.0326	0.796975	1.2061	0.00485	0.00612606	yes
XLOC_211716	XLOC_211716	NM_001144925,NM_001178046,NM_002462	MX1,MX1,MX1	MX1	21:42792519-42831141	PRE	POST	OK	16.8813	29.3337	0.797129	1.13287	0.0129	0.0155083	yes
XLOC_001950	XLOC_001950	NM_015836,NM_201263	WARS2,WARS2	WARS2	1:119560912-119704383	PRE	POST	OK	3.10788	5.43385	0.806046	0.88157	0.03845	0.0458662	yes
XLOC_204202	XLOC_204202	NM_052865	C20orf72	C20orf72	20:17949715-17971766	PRE	POST	OK	3.23757	5.70969	0.8185	0.928636	0.03335	0.0398008	yes
XLOC_001557	XLOC_001557	NM_002038,NM_022872,NM_022873	IFI6,IFI6,IFI6	IFI6	1:27992341-27998724	PRE	POST	OK	23.5111	41.6998	0.826699	0.98805	0.02295	0.0274526	yes
XLOC_071047	XLOC_071047	NM_018656	SLC35E3	SLC35E3	12:69139935-69159853	PRE	POST	OK	3.47656	6.21678	0.838506	0.987844	0.01055	0.0127307	yes
XLOC_120644	XLOC_120644	NM_207444	C15orf53	C15orf53	15:38987947-38992316	PRE	POST	OK	3.844	6.983	0.861238	0.94954	0.0281	0.0335635	yes
XLOC_033817	XLOC_033817	NM_203298	CHCHD1	CHCHD1	10:75541807-75543406	PRE	POST	OK	26.259	47.8497	0.865701	1.20957	0.003	0.00431178	yes
XLOC_033700	XLOC_033700	NM_001007094,NM_001178101,NM_003421	ZNF37A,ZNF37A,ZNF37A	ZNF37A	10:38383263-38413696	PRE	POST	OK	2.24694	4.13696	0.88061	0.843261	0.03355	0.0400385	yes
XLOC_221798	XLOC_221798	NM_002740	PRKCI	PRKCI	3:169940219-170023770	PRE	POST	OK	6.15094	11.4216	0.89289	1.20062	0.01435	0.0172331	yes
XLOC_167630	XLOC_167630	NM_001378	DYNC1I2	DYNC1I2	2:172543926-172605249	PRE	POST	OK	12.5027	23.2633	0.895822	1.01204	0.02645	0.0316001	yes
XLOC_000986	XLOC_000986	NM_001007239,NM_014955,NM_015935	METTL13,METTL13,METTL13	METTL13	1:171750164-171767046	PRE	POST	OK	2.0841	3.90566	0.906137	0.984334	0.02	0.0239388	yes
XLOC_159910	XLOC_159910	NM_001166111,NM_001166112,NM_001166113,NM_001166114,NM_006702	PNPLA6,PNPLA6,PNPLA6,PNPLA6,PNPLA6	PNPLA6	19:7599037-7626653	PRE	POST	OK	5.23355	9.91402	0.921681	0.90988	0.03575	0.0426549	yes
XLOC_393635	XLOC_393635	NM_001011551,NM_152692	C1GALT1C1,C1GALT1C1	C1GALT1C1	X:119759528-119764005	PRE	POST	OK	2.81123	5.41268	0.94514	0.92147	0.02395	0.0286434	yes
XLOC_222083	XLOC_222083	NM_000387	SLC25A20	SLC25A20	3:48894355-48936426	PRE	POST	OK	3.15266	6.0894	0.949729	1.01668	0.0089	0.0107694	yes
XLOC_376316	XLOC_376316	NM_001256685,NM_001256687,NM_001256688,NM_001256689,NM_001256690,NM_001256691,NM_001256692,NM_001256693,NM_014791	MELK,MELK,MELK,MELK,MELK,MELK,MELK,MELK,MELK	MELK	9:36572858-36677680	PRE	POST	OK	2.00176	3.87195	0.951793	0.847022	0.0408	0.0486613	yes
XLOC_001605	XLOC_001605	NM_001195156	ZMYM6NB	ZMYM6NB	1:35447126-35450948	PRE	POST	OK	5.80173	11.3556	0.968852	0.934172	0.02165	0.0259051	yes
XLOC_106690	XLOC_106690	NM_003049	SLC10A1	SLC10A1	14:70242551-70264006	PRE	POST	OK	1.76193	3.48183	0.98269	0.978068	0.01955	0.0234035	yes
XLOC_278931	XLOC_278931	NM_004365	CETN3	CETN3	5:89689528-89705603	PRE	POST	OK	8.23661	16.3544	0.98956	1.16688	0.0099	0.0119583	yes
XLOC_278252	XLOC_278252	NM_002104	GZMK	GZMK	5:54320106-54329960	PRE	POST	OK	6.21419	12.3462	0.990433	0.925045	0.02915	0.0348126	yes
XLOC_222129	XLOC_222129	NM_013324,NM_145071	CISH,CISH	CISH	3:50643699-50649262	PRE	POST	OK	2.11635	4.21251	0.993101	1.02594	0.0155	0.018597	yes
XLOC_053519	XLOC_053519	NM_020886	USP28	USP28	11:113668596-113746296	PRE	POST	OK	3.04305	6.0875	1.00033	0.853619	0.0417	0.0497325	yes
XLOC_105949	XLOC_105949	NM_000270	PNP	PNP	14:20937167-20949292	PRE	POST	OK	18.166	36.3498	1.0007	1.29182	0.0007	0.00343803	yes
XLOC_222019	XLOC_222019	NM_001171171,NM_001171172,NM_001171174,NM_001337	CX3CR1,CX3CR1,CX3CR1,CX3CR1	CX3CR1	3:39304984-39323226	PRE	POST	OK	1.39467	2.80346	1.00728	0.99256	0.0185	0.0221672	yes
XLOC_160812	XLOC_160812	NM_003807,NM_172014	TNFSF14,TNFSF14	TNFSF14	19:6663147-6670599	PRE	POST	OK	1.94957	4.01056	1.04065	0.831409	0.0358	0.0427144	yes
XLOC_217126	XLOC_217126	NM_017414	USP18	USP18	22:18632757-18660162	PRE	POST	OK	1.68624	3.47509	1.04324	0.945597	0.01405	0.0168764	yes
XLOC_308959	XLOC_308959	NM_021062	HIST1H2BB	HIST1H2BB	6:26042059-26046216	PRE	POST	OK	81.5965	170.007	1.05901	0.907834	0.03065	0.036589	yes
XLOC_148671	XLOC_148671	NM_002894,NM_203291,NM_203292	RBBP8,RBBP8,RBBP8	RBBP8	18:20500811-20606455	PRE	POST	OK	1.76395	3.71419	1.07424	0.916573	0.0116	0.0139833	yes
XLOC_308842	XLOC_308842	NM_014161	MRPL18	MRPL18	6:160210843-160219461	PRE	POST	OK	7.75002	16.4255	1.08367	0.916139	0.0316	0.0377196	yes
XLOC_221284	XLOC_221284	NM_000579,NM_001100168	CCR5,CCR5	CCR5	3:46411632-46417697	PRE	POST	OK	3.55729	7.5715	1.0898	1.39803	0.00045	0.00343803	yes
XLOC_167311	XLOC_167311	NM_001202513,NM_001202514,NM_002357	MXD1,MXD1,MXD1	MXD1	2:70142172-70170079	PRE	POST	OK	6.76373	14.6566	1.11565	1.05913	0.01975	0.0236409	yes
XLOC_148739	XLOC_148739	NM_007195	POLI	POLI	18:51795682-51824646	PRE	POST	OK	1.36195	2.95866	1.11927	0.905904	0.0275	0.0328493	yes
XLOC_070918	XLOC_070918	NM_001202233,NM_002135,NM_173157	NR4A1,NR4A1,NR4A1	NR4A1	12:52416615-52453291	PRE	POST	OK	3.26855	7.10399	1.11998	1.21574	0.005	0.00631229	yes
XLOC_071197	XLOC_071197	NM_001032409,NM_002534,NM_016816	OAS1,OAS1,OAS1	OAS1	12:113344738-113357712	PRE	POST	OK	14.4976	31.7902	1.13277	1.48801	0.0005	0.00343803	yes
XLOC_393484	XLOC_393484	NM_016484	PDZD11	PDZD11	X:69506210-69509798	PRE	POST	OK	6.83516	15.1256	1.14595	1.01599	0.02135	0.0255483	yes
XLOC_070720	XLOC_070720	NM_002286	LAG3	LAG3	12:6881633-6887623	PRE	POST	OK	5.02578	11.3144	1.17074	1.3994	0.0017	0.00343803	yes
XLOC_204689	XLOC_204689	NM_002251	KCNS1	KCNS1	20:43720949-43729753	PRE	POST	OK	0.81358	1.88998	1.21602	1.25118	0.00515	0.00649367	yes
XLOC_278283	XLOC_278283	NM_031966	CCNB1	CCNB1	5:68462836-68474070	PRE	POST	OK	1.71082	4.02856	1.23558	0.896647	0.01655	0.0198395	yes
XLOC_131205	XLOC_131205	NM_001146051,NM_031463	HSDL1,HSDL1	HSDL1	16:84155708-84178800	PRE	POST	OK	1.74603	4.1656	1.25445	0.840647	0.02675	0.0319575	yes
XLOC_161406	XLOC_161406	NM_001199324,NM_198480	ZNF615,ZNF615	ZNF615	19:52494586-52511483	PRE	POST	OK	3.92624	9.53424	1.27997	1.21374	0.0089	0.0107694	yes
XLOC_053485	XLOC_053485	NM_138775	ALKBH8	ALKBH8	11:107373452-107436461	PRE	POST	OK	2.674	6.63441	1.31097	1.1046	0.0104	0.0125513	yes
XLOC_204293	XLOC_204293	NM_007186	CEP250	CEP250	20:34043222-34099948	PRE	POST	OK	5.07337	12.6051	1.31299	1.28648	0.026	0.031064	yes
XLOC_000497	XLOC_000497	NM_006820	IFI44L	IFI44L	1:79085926-79111830	PRE	POST	OK	3.82811	10.0194	1.38809	1.07798	0.0131	0.0157468	yes
XLOC_168740	XLOC_168740	NM_005018	PDCD1	PDCD1	2:242792032-242801058	PRE	POST	OK	1.72376	4.57699	1.40884	1.50145	0.0017	0.00343803	yes
XLOC_334742	XLOC_334742	NM_019015	CHPF2	CHPF2	7:150929578-150935953	PRE	POST	OK	9.78168	26.1049	1.41617	1.84752	0.00025	0.00343803	yes
XLOC_033890	XLOC_033890	NM_001270927,NM_001270928,NM_001270929,NM_001270930,NM_001548	,,,,IFIT1	IFIT1	10:91152302-91166244	PRE	POST	OK	0.633019	1.80787	1.51397	1.25191	0.00295	0.00431178	yes
XLOC_278253	XLOC_278253	NM_006144	GZMA	GZMA	5:54398473-54406080	PRE	POST	OK	12.8214	37.4168	1.54514	1.9351	5e-05	0.00343803	yes
XLOC_160184	XLOC_160184	NM_015302	HAUS5	HAUS5	19:36103645-36116251	PRE	POST	OK	1.6441	4.81858	1.55131	1.16728	0.0235	0.0281073	yes
XLOC_000863	XLOC_000863	NM_001193300,NM_001193301,NM_001193302,NM_022367	SEMA4A,SEMA4A,SEMA4A,SEMA4A	SEMA4A	1:156119734-156148273	PRE	POST	OK	2.03841	6.03971	1.56703	1.1017	0.01755	0.0210339	yes
XLOC_278784	XLOC_278784	NM_023073	C5orf42	C5orf42	5:37106329-37249530	PRE	POST	OK	1.26938	3.83614	1.59553	0.995016	0.0139	0.0166977	yes
XLOC_221162	XLOC_221162	NM_001134367,NM_001134368,NM_003043	SLC6A6,SLC6A6,SLC6A6	SLC6A6	3:14444105-14583588	PRE	POST	OK	6.1001	19.2222	1.65587	2.23945	5e-05	0.00343803	yes
XLOC_222531	XLOC_222531	NM_021629	GNB4	GNB4	3:179113875-179169371	PRE	POST	OK	0.568007	1.79607	1.66086	1.046	0.01415	0.0169957	yes
XLOC_130374	XLOC_130374	NM_000663,NM_001127448,NM_020686	ABAT,ABAT,ABAT	ABAT	16:8768443-8878432	PRE	POST	OK	2.13821	6.78971	1.66694	1.11062	0.0181	0.0216899	yes
XLOC_278483	XLOC_278483	NM_001964	EGR1	EGR1	5:137800077-137807312	PRE	POST	OK	15.3665	49.4217	1.68536	2.00961	5e-05	0.00343803	yes
XLOC_140853	XLOC_140853	NM_002470	MYH3	MYH3	17:10531842-10560626	PRE	POST	OK	0.260655	0.975861	1.90453	0.824347	0.03595	0.0428929	yes
XLOC_141367	XLOC_141367	NM_018414	ST6GALNAC1	ST6GALNAC1	17:74620844-74639894	PRE	POST	OK	0.755453	2.93299	1.95696	0.70239	0.0307	0.0366485	yes
XLOC_002008	XLOC_002008	NR_036461	HIST2H2BC	HIST2H2BC	1:149815017-149823161	PRE	POST	OK	36.5269	145.2	1.99101	2.06382	5e-05	0.00343803	yes
XLOC_106625	XLOC_106625	NM_001146015,NM_014750	DLGAP5,DLGAP5	DLGAP5	14:55614833-55658396	PRE	POST	OK	1.78442	7.09457	1.99126	1.59054	0.019	0.0227627	yes
XLOC_248756	XLOC_248756	NM_014485	HPGDS	HPGDS	4:95219706-95264187	PRE	POST	OK	2.02128	8.07166	1.9976	1.3781	0.0078	0.00948942	yes
XLOC_052792	XLOC_052792	NM_001243259,NM_015517,NM_198971	HINFP,HINFP,HINFP	HINFP	11:118992232-119005809	PRE	POST	OK	2.44954	10.0952	2.04308	1.7461	0.0238	0.0284648	yes
XLOC_308404	XLOC_308404	NM_005345	HSPA1A	HSPA1A	6:31783290-31785719	PRE	POST	OK	1.13252	5.01635	2.1471	1.45546	0.00035	0.00343803	yes
XLOC_217190	XLOC_217190	NM_001007468,NM_003073	SMARCB1,SMARCB1	SMARCB1	22:24129054-24181199	PRE	POST	OK	7.55245	36.3847	2.26832	3.85771	5e-05	0.00343803	yes
XLOC_160706	XLOC_160706	NM_005035	POLRMT	POLRMT	19:617222-633568	PRE	POST	OK	3.48226	18.1894	2.385	0.669003	0.0012	0.00343803	yes
XLOC_161158	XLOC_161158	NM_004756	NUMBL	NUMBL	19:41171811-41196556	PRE	POST	OK	0.403673	2.15461	2.41617	1.12236	0.0194	0.0232393	yes
XLOC_204685	XLOC_204685	NR_034104	LOC79015	LOC79015	20:43285091-43300380	PRE	POST	OK	1.52389	8.71235	2.5153	1.73591	0.01255	0.0150913	yes
XLOC_308409	XLOC_308409	NM_005346	HSPA1B	HSPA1B	6:31795511-31798031	PRE	POST	OK	0.49262	2.82038	2.51734	1.24296	0.0007	0.00343803	yes
XLOC_000930	XLOC_000930	NM_002155	HSPA6	HSPA6	1:161494035-161496687	PRE	POST	OK	0.0820806	0.578198	2.81645	0.767921	0.0257	0.030707	yes
XLOC_204674	XLOC_204674	NM_015035	ZHX3	ZHX3	20:39804778-39928739	PRE	POST	OK	0.927579	6.5821	2.827	1.80628	0.00115	0.00343803	yes
XLOC_221305	XLOC_221305	NM_016089	ZNF589	ZNF589	3:48282595-48312479	PRE	POST	OK	2.27179	19.2307	3.08151	4.0595	5e-05	0.00343803	yes
XLOC_121291	XLOC_121291	NM_025234	WDR61	WDR61	15:78556486-78591949	PRE	POST	OK	21.573	284.384	3.72054	6.24106	5e-05	0.00343803	yes
XLOC_222622	XLOC_222622	NM_001145642,NM_014687	KIAA0226,KIAA0226	KIAA0226	3:197397609-197512624	PRE	POST	OK	3.77715	50.5614	3.74267	4.48375	5e-05	0.00343803	yes
XLOC_160131	XLOC_160131	NR_027301	LOC148189	LOC148189	19:28237103-28296603	PRE	POST	OK	0.946962	18.3644	4.27746	1.17101	0.00475	0.0060088	yes
XLOC_034582	XLOC_034582	NR_034125	LOC387723	LOC387723	10:131862161-131909086	PRE	POST	OK	0.802474	16.0378	4.32088	2.48788	0.001	0.00343803	yes
XLOC_356165	XLOC_356165	NM_001001924,NM_001001925,NM_001001931,NM_001166393,NM_020749	MTUS1,MTUS1,MTUS1,MTUS1,MTUS1	MTUS1	8:17501302-17658426	PRE	POST	OK	0.248588	5.94739	4.58043	1.90355	0.04045	0.0482449	yes
XLOC_148810	XLOC_148810	NM_022840	METTL4	METTL4	18:2517541-2571494	PRE	POST	OK	5.93884	155.308	4.7088	6.92873	5e-05	0.00343803	yes
XLOC_308219	XLOC_308219	NM_001135575	C6orf228	C6orf228	6:11094241-11138969	PRE	POST	OK	1.80926	54.8827	4.92288	4.74476	5e-05	0.00343803	yes
XLOC_130305	XLOC_130305	NM_032271	TRAF7	TRAF7	16:2205798-2246465	PRE	POST	OK	4.52969	272.497	5.91068	11.4594	5e-05	0.00343803	yes
XLOC_221184	XLOC_221184	NM_001202476,NM_003341,NM_182666	UBE2E1,UBE2E1,UBE2E1	UBE2E1	3:23847383-23933131	PRE	POST	OK	34.4328	2121.07	5.94486	13.8337	5e-05	0.00343803	yes
XLOC_131014	XLOC_131014	NM_001014979,NM_001195620	C16orf93,C16orf93	C16orf93	16:30759572-30787628	PRE	POST	OK	0.00828556	0.541368	6.02987	0.138472	0.0232	0.0277504	yes
XLOC_034163	XLOC_034163	NM_016299	HSPA14	HSPA14	10:14880172-14920470	PRE	POST	OK	0.0381886	3.40385	6.47788	0.415164	0.04035	0.0481262	yes
XLOC_376353	XLOC_376353	NM_003558	PIP5K1B	PIP5K1B	9:71320554-71624091	PRE	POST	OK	1.25422	191.559	7.25485	2.97546	0.00295	0.00431178	yes
XLOC_033721	XLOC_033721	NM_032023	RASSF4	RASSF4	10:45455218-45490172	PRE	POST	OK	0.114977	35.893	8.28622	1.17103	0.01505	0.018062	yes
XLOC_052813	XLOC_052813	NM_024769	CLMP	CLMP	11:122933322-123066007	PRE	POST	OK	5.2484	27941.8	12.3783	14.0277	5e-05	0.00343803	yes
XLOC_002326	XLOC_002326	NM_203459	CAMSAP2	CAMSAP2	1:200708685-200857577	PRE	POST	OK	3.24979	45412.1	13.7704	8.93673	5e-05	0.00343803	yes

## Sheet: NED_Tcons_PreVsPost
test_id	gene_id	gene	RefGene_name2	Gene	locus	sample_1	sample_2	status	value_1	value_2	log2(fold_change)	test_stat	p_value	q_value	significant
XLOC_476569	XLOC_476569	NM_001042475,NM_001178035,NM_206921	CEP85L,CEP85L,CEP85L	CEP85L	6:118781229-119031274	PRE	POST	OK	347378	12.9985	-14.7059	-18.6962	5e-05	0.000143141	yes
XLOC_609364	XLOC_609364	NM_001012980	SATL1	SATL1	X:84258897-84363974	PRE	POST	OK	102.816	0.0140861	-12.8335	-0.171565	0.003	0.00358875	yes
XLOC_548777	XLOC_548777	NM_001160223,NM_001160224,NM_001160225,NM_030954	RNF170,RNF170,RNF170,RNF170	RNF170	8:42704779-42751866	PRE	POST	OK	1927.18	1.7705	-10.0881	-7.47088	5e-05	0.000143141	yes
XLOC_431068	XLOC_431068	NR_037898	LOC553103	LOC553103	5:131630144-131731688	PRE	POST	OK	3.84283	0.00423214	-9.82657	-0.0868429	0.0382	0.0447215	yes
XLOC_338997	XLOC_338997	NM_001145642,NM_014687	KIAA0226,KIAA0226	KIAA0226	3:197396716-197512670	PRE	POST	OK	2119.34	5.61232	-8.5608	-6.95941	5e-05	0.000143141	yes
XLOC_212858	XLOC_212858	NR_030365	MIR635	MIR635	17:66255322-66453653	PRE	POST	OK	93.0315	0.267403	-8.44256	-1.21332	0.01205	0.0143092	yes
XLOC_180167	XLOC_180167	NM_007280	OIP5	OIP5	15:41601465-41673607	PRE	POST	OK	186.358	0.58172	-8.32353	-2.42886	0.0038	0.00454454	yes
XLOC_212230	XLOC_212230	NM_001013672	C17orf97	C17orf97	17:252067-266845	PRE	POST	OK	33.2407	0.15234	-7.76951	-1.48427	0.0013	0.00164435	yes
XLOC_381452	XLOC_381452	NM_000406	GNRHR	GNRHR	4:68597074-68621853	PRE	POST	OK	103.596	0.963796	-6.74803	-2.86086	0.0279	0.0328401	yes
XLOC_515586	XLOC_515586	NR_002329	ST7-OT4	ST7-OT4	7:116592500-116870075	PRE	POST	OK	0.693858	0.00699591	-6.63198	-0.25969	0.0143	0.0169599	yes
XLOC_195590	XLOC_195590	NM_017810	ZNF434	ZNF434	16:3415120-3451025	PRE	POST	OK	45.9729	1.24798	-5.20312	-1.52949	0.00035	0.000582288	yes
XLOC_310978	XLOC_310978	NM_001167820,NM_001167821,NM_001167822,NM_001167823,NM_006698	BLCAP,BLCAP,BLCAP,BLCAP,BLCAP	BLCAP	20:36054807-36156333	PRE	POST	OK	221.023	7.29962	-4.92023	-3.93243	5e-05	0.000143141	yes
XLOC_002321	XLOC_002321	NM_005298	GPR25	GPR25	1:200838827-200857557	PRE	POST	OK	118.003	4.53102	-4.70284	-2.76055	0.0344	0.0403526	yes
XLOC_243918	XLOC_243918	NM_021216	ZNF71	ZNF71	19:57106653-57135676	PRE	POST	OK	94.712	4.41742	-4.42227	-6.22001	5e-05	0.000143141	yes
XLOC_211611	XLOC_211611	NM_004505	USP6	USP6	17:5031686-5078324	PRE	POST	OK	1.53132	0.0849001	-4.17286	-0.837463	0.02605	0.0306977	yes
XLOC_179659	XLOC_179659	NR_003340	SNORD116-26	SNORD116-26	15:25336744-25367623	PRE	POST	OK	44.0771	2.4634	-4.16131	-1.83582	0.0069	0.00820366	yes
XLOC_255432	XLOC_255432	NR_045786,NR_045787	LOC100861402,LOC100861402	LOC100861402	2:169284591-169643035	PRE	POST	OK	34.6955	2.54421	-3.76946	-2.35112	0.02555	0.0301194	yes
XLOC_431342	XLOC_431342	NM_002020,NM_182925	FLT4,FLT4	FLT4	5:180028505-180076624	PRE	POST	OK	5.97825	0.499003	-3.5826	-1.73614	0.0197	0.023301	yes
XLOC_338840	XLOC_338840	NM_001081455,NM_014879	P2RY14,P2RY14	P2RY14	3:150804675-151176497	PRE	POST	OK	1.06181	0.0941921	-3.49477	-0.310811	0.0296	0.0348043	yes
XLOC_310919	XLOC_310919	NR_045115	MLLT10P1	MLLT10P1	20:29637583-29638138	PRE	POST	OK	2.31818	0.215554	-3.42688	-0.719293	0.0172	0.0203724	yes
XLOC_179914	XLOC_179914	NM_001166340,NM_001172109,NM_001172110,NM_001172111,NM_145204	SENP8,SENP8,SENP8,SENP8,SENP8	SENP8	15:72114590-72438718	PRE	POST	OK	4.69908	0.467512	-3.3293	-0.601631	0.0212	0.0250517	yes
XLOC_608727	XLOC_608727	NM_001005332,NM_001005333,NM_006986	MAGED1,MAGED1,MAGED1	MAGED1	X:51546031-51645561	PRE	POST	OK	117.134	15.0623	-2.95915	-4.30875	5e-05	0.000143141	yes
XLOC_047689	XLOC_047689	NM_001034954,NM_001034955,NM_001034956,NM_001034957,NM_006434,NM_015385,NM_024991	SORBS1,SORBS1,SORBS1,SORBS1,SORBS1,SORBS1,SORBS1	SORBS1	10:97071529-97321171	PRE	POST	OK	0.741452	0.11939	-2.63467	-0.652984	0.02925	0.0344009	yes
XLOC_002290	XLOC_002290	NM_001202423,NM_030934	TRMT1L,TRMT1L	TRMT1L	1:185087217-185265223	PRE	POST	OK	15.1571	2.62945	-2.52716	-1.80827	0.00095	0.00124364	yes
XLOC_310514	XLOC_310514	NM_014962,NM_181443	BTBD3,BTBD3	BTBD3	20:11871476-11907243	PRE	POST	OK	4.80942	0.872413	-2.46278	-1.33802	0.00615	0.00731216	yes
XLOC_105083	XLOC_105083	NR_037144	PLEKHA8P1	PLEKHA8P1	12:45566816-45834340	PRE	POST	OK	4.39933	0.838545	-2.39132	-0.75732	0.0284	0.0334186	yes
XLOC_243778	XLOC_243778	NM_001172655,NM_018260	ZNF701,ZNF701	ZNF701	19:53073525-53090427	PRE	POST	OK	6.63716	1.29088	-2.36221	-1.3851	0.00045	0.000693127	yes
XLOC_196402	XLOC_196402	NM_001082486,NM_001082487,NM_022914	ACD,ACD,ACD	ACD	16:67679028-67694718	PRE	POST	OK	59.2436	11.9706	-2.30716	-3.00197	5e-05	0.000143141	yes
XLOC_001549	XLOC_001549	NM_001990	EYA3	EYA3	1:28296854-28415192	PRE	POST	OK	10.3867	2.31267	-2.1671	-0.639473	0.015	0.0177855	yes
XLOC_476609	XLOC_476609	NM_001242350,NM_004665,NM_078488	VNN2,VNN2,VNN2	VNN2	6:133065008-133084794	PRE	POST	OK	18.2957	4.30683	-2.0868	-1.69865	0.0015	0.00189672	yes
XLOC_331815	XLOC_331815	NM_003935	TOP3B	TOP3B	22:22311402-22337205	PRE	POST	OK	7.49133	1.79803	-2.0588	-1.47089	0.001	0.00129439	yes
XLOC_582040	XLOC_582040	NM_022343	GLIPR2	GLIPR2	9:36136695-36164059	PRE	POST	OK	50.8176	12.3812	-2.03718	-2.90726	0.00265	0.0031704	yes
XLOC_212809	XLOC_212809	NM_022070	HEATR6	HEATR6	17:58119175-58156599	PRE	POST	OK	7.75314	2.24279	-1.78949	-1.75952	0.00025	0.000438834	yes
XLOC_225429	XLOC_225429	NM_001093729,NM_024781	CCDC102B,CCDC102B	CCDC102B	18:66382464-66722426	PRE	POST	OK	7.3115	2.2718	-1.68633	-0.886062	0.0244	0.0287803	yes
XLOC_582409	XLOC_582409	NM_012204	GTF3C4	GTF3C4	9:135469674-135566266	PRE	POST	OK	7.34576	2.45671	-1.58019	-0.984748	0.0329	0.0386212	yes
XLOC_515448	XLOC_515448	NM_004194,NM_016351,NM_021721,NM_021722,NM_021723	ADAM22,ADAM22,ADAM22,ADAM22,ADAM22	ADAM22	7:87563565-87832204	PRE	POST	OK	1.86973	0.626134	-1.57828	-0.565985	0.03795	0.0444361	yes
XLOC_475960	XLOC_475960	NM_016108	AIG1	AIG1	6:143382018-143661441	PRE	POST	OK	15.4093	5.36066	-1.52332	-0.89221	0.04115	0.0481076	yes
XLOC_515885	XLOC_515885	NM_138811	C7orf31	C7orf31	7:25174315-25219930	PRE	POST	OK	2.33138	0.894721	-1.38168	-0.709174	0.02865	0.0337079	yes
XLOC_582231	XLOC_582231	NM_017790,NM_021106,NM_130795,NM_134427,NM_144488,NM_144489	RGS3,RGS3,RGS3,RGS3,RGS3,RGS3	RGS3	9:116207010-116360237	PRE	POST	OK	4.19339	1.64483	-1.35018	-0.605035	0.0411	0.0480504	yes
XLOC_195809	XLOC_195809	NM_025134	CHD9	CHD9	16:53088944-53361680	PRE	POST	OK	9.0139	4.11773	-1.1303	-1.35801	0.0026	0.00311094	yes
XLOC_338767	XLOC_338767	NR_002992,NR_003111	SNORA7B,RPL32P3	SNORA7B	3:129101284-129118282	PRE	POST	OK	30725.9	14689.2	-1.0647	-2.65109	0.01255	0.0149017	yes
XLOC_002427	XLOC_002427	NM_022831	AIDA	AIDA	1:222791427-222906106	PRE	POST	OK	106.389	55.2399	-0.945566	-1.44908	0.0012	0.00151923	yes
XLOC_243121	XLOC_243121	NM_003775	S1PR4	S1PR4	19:3177369-3182533	PRE	POST	OK	23.3062	12.5509	-0.892925	-0.813264	0.04275	0.0499382	yes
XLOC_000494	XLOC_000494	NM_001190987,NM_004768	SRSF11,SRSF11	SRSF11	1:70671364-70718783	PRE	POST	OK	40.492	23.0872	-0.810541	-1.16083	0.00255	0.00305115	yes
XLOC_243086	XLOC_243086	NM_001039847,NM_001039848,NM_002085	GPX4,GPX4,GPX4	GPX4	19:1103935-1106787	PRE	POST	OK	75.3849	46.4305	-0.699202	-0.887562	0.0165	0.0195505	yes
XLOC_243276	XLOC_243276	NM_004907	IER2	IER2	19:13261268-13266331	PRE	POST	OK	79.1909	52.3471	-0.597223	-0.897879	0.01855	0.021955	yes
XLOC_476134	XLOC_476134	NM_005319	HIST1H1C	HIST1H1C	6:26055967-26056699	PRE	POST	OK	1398.44	938.36	-0.575608	-0.9868	0.00485	0.00576878	yes
XLOC_431178	XLOC_431178	NM_001025070,NM_001025071,NM_005617	RPS14,RPS14,RPS14	RPS14	5:149822467-149829631	PRE	POST	OK	1623.64	1115.08	-0.54209	-0.90163	0.02055	0.0242936	yes
XLOC_476247	XLOC_476247	NM_001288	CLIC1	CLIC1	6:31698357-31704341	PRE	POST	OK	56.8105	39.1063	-0.538757	-0.777926	0.03935	0.046042	yes
XLOC_195743	XLOC_195743	NM_001193333,NM_007074	CORO1A,CORO1A	CORO1A	16:30194730-30200575	PRE	POST	OK	86.84	61.6235	-0.494879	-0.831757	0.0288	0.0338816	yes
XLOC_254243	XLOC_254243	NM_006196	PCBP1	PCBP1	2:70314584-70316334	PRE	POST	OK	82.9152	58.9282	-0.492679	-0.794328	0.02815	0.0331291	yes
XLOC_002285	XLOC_002285	NM_001270439,NM_005717	,ARPC5	ARPC5	1:183595327-183605076	PRE	POST	OK	80.5544	58.4988	-0.461555	-0.790933	0.0406	0.0474778	yes
XLOC_475558	XLOC_475558	NM_178014	TUBB	TUBB	6:30688156-30693195	PRE	POST	OK	47.0534	34.4272	-0.450749	-0.747307	0.0375	0.04392	yes
XLOC_243199	XLOC_243199	NM_005968,NM_031203	HNRNPM,HNRNPM	HNRNPM	19:8509762-8554111	PRE	POST	OK	105.569	142.134	0.42907	0.801576	0.03625	0.0424819	yes
XLOC_243661	XLOC_243661	NM_015710	GLTSCR2	GLTSCR2	19:48248792-48260323	PRE	POST	OK	235.672	319.66	0.43976	0.860338	0.03325	0.0390251	yes
XLOC_212929	XLOC_212929	NM_004762,NM_017456	CYTH1,CYTH1	CYTH1	17:76667044-76778407	PRE	POST	OK	60.437	82.2261	0.444163	0.814756	0.0365	0.0427701	yes
XLOC_074900	XLOC_074900	NM_030981	RAB1B	RAB1B	11:66036055-66045328	PRE	POST	OK	65.0429	88.5039	0.444349	0.792778	0.03495	0.0409865	yes
XLOC_212978	XLOC_212978	NM_000918	P4HB	P4HB	17:79801032-79818544	PRE	POST	OK	88.5815	121.437	0.455126	0.830815	0.0274	0.0322626	yes
XLOC_001598	XLOC_001598	NM_005066	SFPQ	SFPQ	1:35641979-35659505	PRE	POST	OK	75.1615	103.403	0.460209	0.699027	0.042	0.0490817	yes
XLOC_548537	XLOC_548537	NM_001127213,NM_002346	LY6E,LY6E	LY6E	8:144099901-144103827	PRE	POST	OK	115.932	159.791	0.462898	0.796782	0.0343	0.0402364	yes
XLOC_515603	XLOC_515603	NM_014390	SND1	SND1	7:127290784-127733523	PRE	POST	OK	52.6036	72.577	0.464351	0.801922	0.03275	0.0384487	yes
XLOC_515954	XLOC_515954	NM_002787	PSMA2	PSMA2	7:42956461-42971805	PRE	POST	OK	89.9903	124.568	0.469094	0.764512	0.0346	0.0405835	yes
XLOC_515933	XLOC_515933	NM_022373	HERPUD2	HERPUD2	7:35672124-35737687	PRE	POST	OK	66.9917	93.5768	0.482168	0.820291	0.02955	0.0347465	yes
XLOC_000066	XLOC_000066	NM_001199860,NM_001199861,NM_001199862,NM_001199863,NM_003636,NM_172130	KCNAB2,KCNAB2,KCNAB2,KCNAB2,KCNAB2,KCNAB2	KCNAB2	1:5922869-6161325	PRE	POST	OK	28.521	40.2821	0.498114	0.841713	0.0335	0.0393135	yes
XLOC_244034	XLOC_244034	NM_015898	ZBTB7A	ZBTB7A	19:4044606-4066919	PRE	POST	OK	14.6038	20.6373	0.498909	0.808048	0.04025	0.0470763	yes
XLOC_243712	XLOC_243712	NM_001204502,NM_001204503,NM_001459	FLT3LG,FLT3LG,FLT3LG	FLT3LG	19:49977465-49989491	PRE	POST	OK	266.029	379.898	0.514025	0.996139	0.0189	0.0223654	yes
XLOC_548346	XLOC_548346	NM_017780	CHD7	CHD7	8:61591323-61780586	PRE	POST	OK	11.5487	16.4979	0.514555	0.815263	0.03535	0.0414472	yes
XLOC_254458	XLOC_254458	NM_001256584,NM_002101,NM_016815	GYPC,GYPC,GYPC	GYPC	2:127413510-127454476	PRE	POST	OK	101.518	145.786	0.522109	0.908431	0.0174	0.0206074	yes
XLOC_254331	XLOC_254331	NM_002371,NM_022438,NM_022439,NM_022440	MAL,MAL,MAL,MAL	MAL	2:95689239-95721035	PRE	POST	OK	163.112	234.533	0.523929	0.851892	0.0329	0.0386212	yes
XLOC_608739	XLOC_608739	NM_022117	TSPYL2	TSPYL2	X:53111040-53117948	PRE	POST	OK	26.9698	38.9996	0.532115	0.878871	0.02355	0.0277911	yes
XLOC_158785	XLOC_158785	NM_001001	RPL36AL	RPL36AL	14:50084939-50087349	PRE	POST	OK	1676.22	2429.14	0.535238	0.917075	0.01535	0.0181982	yes
XLOC_254130	XLOC_254130	NM_001127399,NM_001127400,NM_001127401,NM_016061	YPEL5,YPEL5,YPEL5,YPEL5	YPEL5	2:30369741-30394093	PRE	POST	OK	144.443	210.687	0.5446	0.825854	0.03295	0.0386787	yes
XLOC_195944	XLOC_195944	NM_002811	PSMD7	PSMD7	16:74330672-74340186	PRE	POST	OK	58.696	85.874	0.548961	0.920558	0.01125	0.0133605	yes
XLOC_075275	XLOC_075275	NR_002728	KCNQ1OT1	KCNQ1OT1	11:2466220-2870358	PRE	POST	OK	2.48934	3.65044	0.552307	0.815072	0.02945	0.0346312	yes
XLOC_244062	XLOC_244062	NM_001193375,NM_175614	NDUFA11,NDUFA11	NDUFA11	19:5891286-5904070	PRE	POST	OK	104.022	154.606	0.571707	0.948638	0.0171	0.020255	yes
XLOC_211861	XLOC_211861	NM_000981	RPL19	RPL19	17:37355512-37360990	PRE	POST	OK	1957.36	2968.69	0.600912	0.98432	0.0147	0.0174321	yes
XLOC_180028	XLOC_180028	NM_002201	ISG20	ISG20	15:89178101-89199758	PRE	POST	OK	50.4573	76.5492	0.601324	0.910517	0.03265	0.0383329	yes
XLOC_195804	XLOC_195804	NM_001040284,NM_001040285	PAPD5,PAPD5	PAPD5	16:50186744-50269219	PRE	POST	OK	8.84705	13.4224	0.601374	0.884229	0.02615	0.0308135	yes
XLOC_515381	XLOC_515381	NM_001257190,NM_172020	POM121,POM121	POM121	7:72349816-72425302	PRE	POST	OK	14.2554	21.6599	0.603521	0.800848	0.03395	0.0398326	yes
XLOC_254351	XLOC_254351	NM_001862	COX5B	COX5B	2:98262520-98264657	PRE	POST	OK	242.537	369.769	0.60842	1.07074	0.0073	0.00867575	yes
XLOC_001958	XLOC_001958	NM_032305	POLR3GL	POLR3GL	1:145455806-145470396	PRE	POST	OK	33.0043	50.658	0.618137	0.853314	0.0255	0.0300612	yes
XLOC_311121	XLOC_311121	NM_001039467,NM_005873	RGS19,RGS19	RGS19	20:62704520-62711324	PRE	POST	OK	27.7553	43.0765	0.634135	0.942202	0.02285	0.0269756	yes
XLOC_243478	XLOC_243478	NM_001281	TBCB	TBCB	19:36602104-36616849	PRE	POST	OK	48.6174	75.6544	0.637949	0.909486	0.02495	0.029421	yes
XLOC_430379	XLOC_430379	NM_001867	COX7C	COX7C	5:85913447-85916780	PRE	POST	OK	1043.99	1643.59	0.654737	1.05897	0.00795	0.00944762	yes
XLOC_158684	XLOC_158684	NM_001077351,NM_001077352,NM_018107	RBM23,RBM23,RBM23	RBM23	14:23369587-23388396	PRE	POST	OK	103.772	163.537	0.656207	1.00074	0.0108	0.0128328	yes
XLOC_254655	XLOC_254655	NM_001257102,NM_002491	NDUFB3,NDUFB3	NDUFB3	2:201936461-201950473	PRE	POST	OK	114.383	180.861	0.661011	0.973723	0.0087	0.0103385	yes
XLOC_475688	XLOC_475688	NM_001134493	TOMM6	TOMM6	6:41755180-41759442	PRE	POST	OK	87.8432	139.02	0.662293	0.946681	0.01775	0.0210172	yes
XLOC_382204	XLOC_382204	NM_001130688,NM_001130689,NM_002129	HMGB2,HMGB2,HMGB2	HMGB2	4:174247825-174255595	PRE	POST	OK	95.5546	151.533	0.665237	1.22323	0.0047	0.0055904	yes
XLOC_431061	XLOC_431061	NM_005340	HINT1	HINT1	5:130494874-130501072	PRE	POST	OK	751.373	1191.75	0.665479	1.22185	0.00265	0.0031704	yes
XLOC_515373	XLOC_515373	NM_017994	C7orf42	C7orf42	7:66386202-66423538	PRE	POST	OK	47.8999	76.012	0.666206	0.876865	0.0207	0.0244688	yes
XLOC_381336	XLOC_381336	NR_003132	HSP90AB2P	HSP90AB2P	4:13306897-13343937	PRE	POST	OK	26.0778	41.996	0.687427	0.96502	0.0058	0.00689805	yes
XLOC_582146	XLOC_582146	NM_032310	C9orf89	C9orf89	9:95858431-95875763	PRE	POST	OK	42.8808	70.0086	0.707202	0.982812	0.01385	0.0164289	yes
XLOC_212987	XLOC_212987	NM_001271006,NM_001271007,NM_144998	,,STRA13	STRA13	17:79976343-79980785	PRE	POST	OK	35.3624	58.0173	0.714266	0.875065	0.0262	0.0308713	yes
XLOC_430707	XLOC_430707	NM_138820	HIGD2A	HIGD2A	5:175815783-175816751	PRE	POST	OK	284.732	472.225	0.729868	1.34121	0.00085	0.00116102	yes
XLOC_158798	XLOC_158798	NM_024884	L2HGDH	L2HGDH	14:50709151-50778947	PRE	POST	OK	3.59295	6.05178	0.752192	0.614902	0.0397	0.0464437	yes
XLOC_180086	XLOC_180086	NR_027053	LOC646214	LOC646214	15:21932513-21940739	PRE	POST	OK	3.42612	5.79325	0.757797	0.798321	0.0299	0.0351506	yes
XLOC_133842	XLOC_133842	NR_027995	ANKRD20A9P	ANKRD20A9P	13:19408542-19446109	PRE	POST	OK	0.812696	1.38116	0.765095	0.801536	0.02335	0.0275589	yes
XLOC_516051	XLOC_516051	NM_001099415	POM121C	POM121C	7:75039062-75157453	PRE	POST	OK	11.1418	19.0846	0.77643	0.968824	0.00545	0.00648197	yes
XLOC_476133	XLOC_476133	NM_021062	HIST1H2BB	HIST1H2BB	6:26043454-26043885	PRE	POST	OK	66.3664	114.522	0.787096	0.856184	0.0331	0.038852	yes
XLOC_338982	XLOC_338982	NM_015562	UBXN7	UBXN7	3:196074441-196159345	PRE	POST	OK	25.8995	44.9227	0.794517	0.965774	0.0152	0.0180213	yes
XLOC_001438	XLOC_001438	NM_001089591	UQCRHL	UQCRHL	1:16133656-16134194	PRE	POST	OK	44.2103	76.9656	0.799831	0.850901	0.0224	0.0264509	yes
XLOC_133673	XLOC_133673	NM_014059	RGCC	RGCC	13:42031443-42045946	PRE	POST	OK	92.8194	162.055	0.803989	1.18908	0.0042	0.00500999	yes
XLOC_310747	XLOC_310747	NM_198976	TH1L	TH1L	20:57556262-57570190	PRE	POST	OK	17.0797	30.1726	0.820953	0.894835	0.0348	0.0408131	yes
XLOC_195635	XLOC_195635	NM_001145204,NM_001145205	SHISA9,SHISA9	SHISA9	16:12995476-13334273	PRE	POST	OK	6.15516	10.9032	0.824887	1.00381	0.0074	0.00879455	yes
XLOC_430427	XLOC_430427	NR_015370	EPB41L4A-AS1	EPB41L4A-AS1	5:111496222-111498198	PRE	POST	OK	82.8003	147.662	0.834595	1.23356	0.00135	0.00170742	yes
XLOC_254475	XLOC_254475	NM_025029	MZT2B	MZT2B	2:130908964-130948303	PRE	POST	OK	96.5105	173.097	0.842818	1.25928	0.00395	0.00472385	yes
XLOC_158625	XLOC_158625	NM_006427,NM_021709	SIVA1,SIVA1	SIVA1	14:105219469-105225996	PRE	POST	OK	81.3746	145.996	0.843277	1.10016	0.0058	0.00689805	yes
XLOC_515875	XLOC_515875	NM_019059	TOMM7	TOMM7	7:22852251-22862421	PRE	POST	OK	742.833	1335.26	0.846015	1.42593	0.00025	0.000438834	yes
XLOC_196258	XLOC_196258	NM_006319	CDIPT	CDIPT	16:29869677-29874578	PRE	POST	OK	23.8773	43.6959	0.87186	1.23136	0.0035	0.00418641	yes
XLOC_255398	XLOC_255398	NM_006186	NR4A2	NR4A2	2:157179867-157190990	PRE	POST	OK	39.3432	72.1853	0.87559	1.26902	0.0024	0.00288243	yes
XLOC_105034	XLOC_105034	NM_005691,NM_020297	ABCC9,ABCC9	ABCC9	12:21950281-22089628	PRE	POST	OK	11.6353	21.4051	0.879451	0.982993	0.004	0.00478359	yes
XLOC_609306	XLOC_609306	NM_002547	OPHN1	OPHN1	X:67262185-67653299	PRE	POST	OK	3.90727	7.28539	0.898845	1.00812	0.0045	0.00536749	yes
XLOC_338513	XLOC_338513	NM_001251877,NM_003363,NM_199443	USP4,USP4,USP4	USP4	3:49314576-49378323	PRE	POST	OK	18.7428	35.1636	0.907748	0.95129	0.0289	0.0339971	yes
XLOC_381399	XLOC_381399	NM_001111112,NM_001111113,NM_005339	UBE2K,UBE2K,UBE2K	UBE2K	4:39699663-39784410	PRE	POST	OK	49.327	93.0452	0.915555	0.935974	0.04255	0.0497089	yes
XLOC_074844	XLOC_074844	NM_001135208,NM_004470,NM_057092	FKBP2,FKBP2,FKBP2	FKBP2	11:64007731-64011760	PRE	POST	OK	51.7567	98.9859	0.935479	1.30085	0.00415	0.00495041	yes
XLOC_338983	XLOC_338983	NM_152617	RNF168	RNF168	3:196195652-196230712	PRE	POST	OK	46.5724	89.0792	0.935614	1.29362	0.00125	0.00158233	yes
XLOC_337842	XLOC_337842	NM_199069,NM_199070,NM_199073,NM_199074	NDUFAF3,NDUFAF3,NDUFAF3,NDUFAF3	NDUFAF3	3:49026560-49131774	PRE	POST	OK	61.8601	118.426	0.936909	0.896604	0.04135	0.0483373	yes
XLOC_331834	XLOC_331834	NM_213720	CHCHD10	CHCHD10	22:24105207-24110141	PRE	POST	OK	152.416	300.423	0.97898	1.4404	0.00065	0.000912063	yes
XLOC_179878	XLOC_179878	NM_182703	ANKDD1A	ANKDD1A	15:65204100-65251041	PRE	POST	OK	27.9405	55.0868	0.97935	1.63107	5e-05	0.000143141	yes
XLOC_001047	XLOC_001047	NM_002922	RGS1	RGS1	1:192544782-192550085	PRE	POST	OK	90.8294	179.38	0.981791	1.48904	0.0003	0.000511731	yes
XLOC_244782	XLOC_244782	NM_001145542,NM_001145543,NM_001145544,NM_023926	ZSCAN18,ZSCAN18,ZSCAN18,ZSCAN18	ZSCAN18	19:58594598-58629793	PRE	POST	OK	99.4314	196.537	0.983031	1.35536	0.00095	0.00124364	yes
XLOC_381846	XLOC_381846	NM_017741	DCAF16	DCAF16	4:17796569-17812390	PRE	POST	OK	11.2226	23.3437	1.05663	1.36987	0.01775	0.0210172	yes
XLOC_515675	XLOC_515675	NM_004546	NDUFB2	NDUFB2	7:140395135-140406446	PRE	POST	OK	58.3028	122.151	1.06703	1.05316	0.00855	0.0101604	yes
XLOC_582853	XLOC_582853	NM_001184734,NM_001184735,NM_014010,NM_198186,NM_198187,NM_198188	ASTN2,ASTN2,ASTN2,ASTN2,ASTN2,ASTN2	ASTN2	9:119187158-120177317	PRE	POST	OK	9.79623	20.8107	1.08703	1.08704	0.00855	0.0101604	yes
XLOC_211845	XLOC_211845	NM_007026	DUSP14	DUSP14	17:35849950-35873588	PRE	POST	OK	7.75671	16.5084	1.08969	0.927543	0.0241	0.0284316	yes
XLOC_000672	XLOC_000672	NM_152367	MAB21L3	MAB21L3	1:116654375-116677861	PRE	POST	OK	6.46255	14.7525	1.19079	1.30578	0.0007	0.00096839	yes
XLOC_212199	XLOC_212199	NM_001086521	C17orf89	C17orf89	17:79213110-79215532	PRE	POST	OK	28.2949	65.0074	1.20006	1.24369	0.0048	0.00570933	yes
XLOC_105406	XLOC_105406	NM_016226,NM_057180	VPS29,VPS29	VPS29	12:110929329-110939917	PRE	POST	OK	24.8995	60.121	1.27175	1.55766	0.0036	0.00430598	yes
XLOC_338717	XLOC_338717	NM_173825	RABL3	RABL3	3:120405359-120461518	PRE	POST	OK	2.56267	6.30496	1.29884	0.878564	0.03075	0.0361354	yes
XLOC_337886	XLOC_337886	NM_014366,NM_206825,NM_206826	GNL3,GNL3,GNL3	GNL3	3:52579367-52742635	PRE	POST	OK	15.5955	38.5026	1.30382	1.13558	0.021	0.0248184	yes
XLOC_047287	XLOC_047287	NM_001227,NM_001267056,NM_001267057,NM_001267058,NM_033338,NM_033339,NM_033340	CASP7,,,,CASP7,CASP7,CASP7	CASP7	10:115438675-115491130	PRE	POST	OK	4.36568	11.1568	1.35365	1.02949	0.027	0.0317984	yes
XLOC_001591	XLOC_001591	NM_004427,NM_198040	PHC2,PHC2	PHC2	1:33788609-33841194	PRE	POST	OK	8.11388	21.3891	1.39841	2.07337	0.00015	0.000280199	yes
XLOC_001992	XLOC_001992	NR_036461	HIST2H2BC	HIST2H2BC	1:149818621-149823161	PRE	POST	OK	19.7652	54.5923	1.46574	1.21499	0.00585	0.00695746	yes
XLOC_225391	XLOC_225391	NM_007195	POLI	POLI	18:51795848-51824604	PRE	POST	OK	2.33316	7.28423	1.64249	0.992705	0.0211	0.0249346	yes
XLOC_609232	XLOC_609232	NM_013271	PCSK1N	PCSK1N	X:48689505-48693960	PRE	POST	OK	6.2512	19.9186	1.67191	1.08988	0.00825	0.00980403	yes
XLOC_430728	XLOC_430728	NR_003615	LOC728554	LOC728554	5:177236351-177311840	PRE	POST	OK	3.64782	11.9435	1.71112	0.771337	0.0398	0.0465591	yes
XLOC_047797	XLOC_047797	NM_213649	SFXN4	SFXN4	10:120900368-120925204	PRE	POST	OK	1.69556	5.77209	1.76733	0.832059	0.0379	0.0443791	yes
XLOC_515648	XLOC_515648	NM_001724,NM_199186	BPGM,BPGM	BPGM	7:134331530-134364567	PRE	POST	OK	7.15821	27.3751	1.93519	2.10095	0.0003	0.000511731	yes
XLOC_515464	XLOC_515464	NM_021167	GATAD1	GATAD1	7:92076761-92157854	PRE	POST	OK	1.91522	7.56912	1.98262	0.777381	0.0391	0.0457556	yes
XLOC_515772	XLOC_515772	NM_001042535,NM_031946	AGAP3,AGAP3	AGAP3	7:150783825-150841685	PRE	POST	OK	1.586	6.86762	2.11442	1.14902	0.0162	0.0191976	yes
XLOC_075882	XLOC_075882	NM_001077263,NM_001206789,NM_001206790,NM_001244995	TMPRSS13,TMPRSS13,TMPRSS13,TMPRSS13	TMPRSS13	11:117771355-117800168	PRE	POST	OK	0.175944	0.771723	2.13297	0.491837	0.0391	0.0457556	yes
XLOC_158160	XLOC_158160	NM_001001912	OR4E2	OR4E2	14:22133296-22134238	PRE	POST	OK	0.266055	1.30882	2.29847	0.530183	0.04125	0.0482222	yes
XLOC_476509	XLOC_476509	NM_001143957,NM_030784	GPR63,GPR63	GPR63	6:97241997-97285353	PRE	POST	OK	0.123175	0.623452	2.33957	0.651344	0.0273	0.0321465	yes
XLOC_212924	XLOC_212924	NM_001127198,NM_007267	TMC6,TMC6	TMC6	17:75955200-76139049	PRE	POST	OK	26.404	141.95	2.42656	3.10424	5e-05	0.000143141	yes
XLOC_244251	XLOC_244251	NM_020959	ANO8	ANO8	19:17420186-17445638	PRE	POST	OK	1.52085	8.74401	2.52342	1.22207	0.0105	0.0124767	yes
XLOC_000794	XLOC_000794	NM_178354	LCE1F	LCE1F	1:152748847-152749445	PRE	POST	OK	0.149005	0.880493	2.56295	0.373716	0.0355	0.0416197	yes
XLOC_609506	XLOC_609506	NR_033941	LOC100129515	LOC100129515	X:134252881-134254405	PRE	POST	OK	0.0986222	0.623599	2.66063	0.343769	0.0418	0.0488533	yes
XLOC_582893	XLOC_582893	NM_001144877,NM_173690	SCAI,SCAI	SCAI	9:127704887-127905838	PRE	POST	OK	4.65699	29.8921	2.6823	1.99465	0.0002	0.000359462	yes
XLOC_382105	XLOC_382105	NM_000586	IL2	IL2	4:123372625-123377650	PRE	POST	OK	0.102061	0.788449	2.94958	0.462331	0.03425	0.0401784	yes
XLOC_516173	XLOC_516173	NM_001111038,NM_145032	FBXL13,FBXL13	FBXL13	7:102453286-102715288	PRE	POST	OK	1.06795	8.48559	2.99018	1.36204	0.00965	0.0114671	yes
XLOC_000330	XLOC_000330	NM_001136493,NM_032793	MFSD2A,MFSD2A	MFSD2A	1:40420783-40435628	PRE	POST	OK	0.0866501	0.739923	3.0941	0.65038	0.0395	0.0462148	yes
XLOC_212259	XLOC_212259	NR_028335	LOC284009	LOC284009	17:2310274-2318730	PRE	POST	OK	0.105719	1.03708	3.29421	0.498514	0.0384	0.0449498	yes
XLOC_074523	XLOC_074523	NM_001004749	OR51A7	OR51A7	11:4928599-4929538	PRE	POST	OK	0.119928	1.19333	3.31476	0.717275	0.0206	0.024352	yes
XLOC_105027	XLOC_105027	NM_024730	RERGL	RERGL	12:18233802-18243114	PRE	POST	OK	0.07527	0.808229	3.42462	0.521184	0.01765	0.0209004	yes
XLOC_515441	XLOC_515441	NM_001256414,NM_002069	GNAI1,GNAI1	GNAI1	7:79764139-79848725	PRE	POST	OK	0.588412	6.41843	3.44732	1.43296	0.0348	0.0408131	yes
XLOC_075508	XLOC_075508	NM_001005272	OR4A5	OR4A5	11:51411377-51412448	PRE	POST	OK	0.0903071	1.0253	3.50507	0.661503	0.01835	0.0217204	yes
XLOC_001835	XLOC_001835	NM_001261408,NM_001261409,NM_001261410,NM_003567	,,,BCAR3	BCAR3	1:94027342-94312706	PRE	POST	OK	0.083286	1.08893	3.7087	0.600555	0.0222	0.0262188	yes
XLOC_196001	XLOC_196001	NR_024399,NR_024402	MGC23284,MGC23284	MGC23284	16:88729780-88753594	PRE	POST	OK	0.537945	7.1353	3.72944	0.785223	0.00455	0.00542563	yes
XLOC_243354	XLOC_243354	NR_036155	MIR3188	MIR3188	19:18367419-18395225	PRE	POST	OK	24.7042	328.127	3.73142	8.14926	0.0134	0.0158977	yes
XLOC_104611	XLOC_104611	NM_001031679,NM_001193460,NM_001193461,NM_198080	MSRB3,MSRB3,MSRB3,MSRB3	MSRB3	12:65672422-65860687	PRE	POST	OK	0.268571	3.61164	3.74928	0.838623	0.01915	0.0226583	yes
XLOC_104531	XLOC_104531	NM_001005243	OR9K2	OR9K2	12:55523552-55524560	PRE	POST	OK	0.138065	1.88248	3.76922	0.916295	0.0113	0.0134198	yes
XLOC_196340	XLOC_196340	NM_001207030	LOC643802	LOC643802	16:53403273-53405041	PRE	POST	OK	0.0332448	0.454536	3.77319	0.477678	0.0374	0.0438044	yes
XLOC_254182	XLOC_254182	NR_034099	LOC388948	LOC388948	2:47043806-47049799	PRE	POST	OK	0.0452779	0.69389	3.93783	0.444497	0.0224	0.0264509	yes
XLOC_582713	XLOC_582713	NR_040117	LOC392364	LOC392364	9:90472957-90473971	PRE	POST	OK	0.0344155	0.549917	3.99808	0.48626	0.03695	0.0432871	yes
XLOC_338108	XLOC_338108	NM_001102608	COL6A6	COL6A6	3:130279177-130395888	PRE	POST	OK	0.151357	2.47485	4.03132	0.965771	0.01185	0.014072	yes
XLOC_582801	XLOC_582801	NM_001004481	OR13C2	OR13C2	9:107366951-107367908	PRE	POST	OK	0.0645202	1.16466	4.17402	0.676941	0.0313	0.0367724	yes
XLOC_515346	XLOC_515346	NR_026929	DKFZp434L192	DKFZp434L192	7:56563915-56564977	PRE	POST	OK	0.0415264	0.863751	4.37851	0.582825	0.02	0.0236521	yes
XLOC_002543	XLOC_002543	NM_001001964	OR2T11	OR2T11	1:248789478-248790429	PRE	POST	OK	0.0610236	1.37513	4.49406	0.770099	0.04155	0.0485671	yes
XLOC_002268	XLOC_002268	NR_037642	LOC100527964	LOC100527964	1:180199432-180256517	PRE	POST	OK	3.31221	97.4923	4.87942	1.74129	0.01505	0.0178446	yes
XLOC_047592	XLOC_047592	NM_020999	NEUROG3	NEUROG3	10:71331790-71333210	PRE	POST	OK	0.0714573	2.2535	4.97894	0.937057	0.00555	0.00660082	yes
XLOC_609088	XLOC_609088	NR_039991	LOC100507404	LOC100507404	X:154696200-154966853	PRE	POST	OK	0.033696	1.16643	5.11338	0.309284	0.01695	0.0200789	yes
XLOC_212064	XLOC_212064	NM_203425	C17orf82	C17orf82	17:59489111-59490641	PRE	POST	OK	0.0370627	1.59064	5.42349	0.857441	0.03045	0.0357878	yes
XLOC_338746	XLOC_338746	NM_001015050,NM_001195223	ALG1L,ALG1L	ALG1L	3:125635443-125655887	PRE	POST	OK	0.0299827	1.62558	5.76069	0.619683	0.0205	0.0242353	yes
XLOC_074925	XLOC_074925	NM_001018070	CORO1B	CORO1B	11:67195788-67213906	PRE	POST	OK	8.8692	608.551	6.10043	1.84847	0.0002	0.000359462	yes
XLOC_196042	XLOC_196042	NM_001031737	CCDC78	CCDC78	16:771141-776473	PRE	POST	OK	0.0960505	7.67986	6.32114	0.831683	0.0291	0.0342274	yes
XLOC_255450	XLOC_255450	NM_004882	CIR1	CIR1	2:175212877-175260443	PRE	POST	OK	18.2519	2260.9	6.95271	13.7472	5e-05	0.000143141	yes
XLOC_582248	XLOC_582248	NM_016322	RAB14	RAB14	9:123836862-123970118	PRE	POST	OK	1.47987	281.482	7.57143	1.09045	0.0298	0.0350356	yes
XLOC_338627	XLOC_338627	NM_001145845,NM_002941,NM_133631	ROBO1,ROBO1,ROBO1	ROBO1	3:78646387-79817059	PRE	POST	OK	0.0319589	7.9396	7.9567	0.608032	0.012	0.0142498	yes
XLOC_075455	XLOC_075455	NM_005898	CAPRIN1	CAPRIN1	11:34072521-34125294	PRE	POST	OK	1.5252	431.365	8.14377	1.47636	0.03655	0.0428279	yes
XLOC_381931	XLOC_381931	NM_000406,NM_001012763	GNRHR,GNRHR	GNRHR	4:68597074-68621853	PRE	POST	OK	0.152465	79.4399	9.02525	1.63988	0.00945	0.0112294	yes
XLOC_331978	XLOC_331978	NM_138481	CHADL	CHADL	22:41601312-41637054	PRE	POST	OK	0.136197	74.8388	9.10195	1.38379	0.00455	0.00542563	yes
XLOC_244696	XLOC_244696	NM_182609	ZNF677	ZNF677	19:53738637-53758123	PRE	POST	OK	0.58651	349.101	9.21727	3.56671	0.0205	0.0242353	yes
XLOC_074981	XLOC_074981	NM_182969	XRRA1	XRRA1	11:74459912-74660232	PRE	POST	OK	1.01337	676.305	9.38237	2.22532	0.00055	0.00081669	yes
XLOC_516293	XLOC_516293	NM_020632,NM_130840,NM_130841	ATP6V0A4,ATP6V0A4,ATP6V0A4	ATP6V0A4	7:138391038-138490769	PRE	POST	OK	0.0123528	16.0399	10.3426	0.171616	0.0211	0.0249346	yes
XLOC_105029	XLOC_105029	NM_021094,NM_134431	SLCO1A2,SLCO1A2	SLCO1A2	12:21417533-21548371	PRE	POST	OK	0.10509	145.243	10.4326	1.03434	0.0023	0.00277341	yes
XLOC_255170	XLOC_255170	NM_019896	POLE4	POLE4	2:75155771-75197001	PRE	POST	OK	5.19052	8376.36	10.6562	9.23613	5e-05	0.000143141	yes
XLOC_159085	XLOC_159085	NM_002226,NM_145159	JAG2,JAG2	JAG2	14:105607317-105635161	PRE	POST	OK	0.17201	319.533	10.8593	1.88864	0.00035	0.000582288	yes
XLOC_254434	XLOC_254434	NM_001004360,NM_001178034,NM_001178036,NM_001178037,NM_020868	DPP10,DPP10,DPP10,DPP10,DPP10	DPP10	2:115199898-116602326	PRE	POST	OK	0.0884651	174.752	10.9479	0.839318	0.005	0.00594705	yes
XLOC_001236	XLOC_001236	NM_001004342	TRIM67	TRIM67	1:231298673-231357314	PRE	POST	OK	0.0552484	1085.01	14.2614	0.608424	0.0046	0.00547157	yes
XLOC_338698	XLOC_338698	NM_173799	TIGIT	TIGIT	3:113978018-114029355	PRE	POST	OK	0.22479	11180.5	15.602	1.90534	0.034	0.0398903	yes

## Sheet: Relapse_Tcons_PreVsPost
test_id	gene_id	gene	RefGene_name2	Gene	locus	sample_1	sample_2	status	value_1	value_2	log2(fold_change)	test_stat	p_value	q_value	significant
XLOC_077313	XLOC_077313	NM_001143805,NM_001143806,NM_001143807,NM_001143808,NM_001143809,NM_001143810,NM_001143811,NM_001143812,NM_001143813,NM_001143814,NM_001143816,NM_001709,NM_170731,NM_170732,NM_170733,NM_170734,NM_170735	BDNF,BDNF,BDNF,BDNF,BDNF,BDNF,BDNF,BDNF,BDNF,BDNF,BDNF,BDNF,BDNF,BDNF,BDNF,BDNF,BDNF	BDNF	11:27528398-27743674	PRE	POST	OK	11738.6	0.115683	-16.6307	-1.40824	5e-05	0.00121018	yes
XLOC_440993	XLOC_440993	NM_001164442	FAM159B	FAM159B	5:63986134-64064496	PRE	POST	OK	2913.74	0.0516193	-15.7846	-0.580678	0.0248	0.028467	yes
XLOC_528809	XLOC_528809	NR_003075	SNORD93	SNORD93	7:22893858-22900198	PRE	POST	OK	41401.2	0.89147	-15.5031	-4.80622	0.0272	0.0312196	yes
XLOC_597263	XLOC_597263	NM_194313	KIF24	KIF24	9:34179002-34329198	PRE	POST	OK	1573.39	0.111705	-13.7819	-1.20323	0.0085	0.00977375	yes
XLOC_077525	XLOC_077525	NM_016938	EFEMP2	EFEMP2	11:65627871-65640480	PRE	POST	OK	3936.11	0.287515	-13.7408	-2.48904	0.0004	0.00121018	yes
XLOC_076674	XLOC_076674	NM_017870,NM_178031	TMEM132A,TMEM132A	TMEM132A	11:60691912-60719524	PRE	POST	OK	76.0335	0.0249642	-11.5726	-0.313398	0.0163	0.0187178	yes
XLOC_529630	XLOC_529630	NM_031925	TMEM120A	TMEM120A	7:75544419-75623992	PRE	POST	OK	3238.31	2.97054	-10.0903	-8.47354	5e-05	0.00121018	yes
XLOC_135739	XLOC_135739	NM_001198950,NM_015011	MYO16,MYO16	MYO16	13:109248499-109860355	PRE	POST	OK	105.647	0.258887	-8.67271	-1.87882	0.00615	0.00709035	yes
XLOC_077438	XLOC_077438	NM_004778	PTGDR2	PTGDR2	11:60609428-60623444	PRE	POST	OK	11.5132	0.0390949	-8.20209	-0.531746	0.01775	0.0203807	yes
XLOC_216745	XLOC_216745	NM_173628	DNAH17	DNAH17	17:76374726-76573476	PRE	POST	OK	9.76787	0.0382858	-7.99509	-0.509468	0.0034	0.00396884	yes
XLOC_182475	XLOC_182475	NM_001036,NM_001243996	RYR3,RYR3	RYR3	15:33603176-34158303	PRE	POST	OK	6.42741	0.0278705	-7.84936	-0.325047	0.0309	0.0354626	yes
XLOC_049011	XLOC_049011	NM_001033083,NM_022129	PBLD,PBLD	PBLD	10:70042416-70103092	PRE	POST	OK	218.434	1.07292	-7.66951	-2.35362	5e-05	0.00121018	yes
XLOC_596767	XLOC_596767	NM_001135999,NM_014806	RUSC2,RUSC2	RUSC2	9:35490006-35563896	PRE	POST	OK	12.2993	0.0730522	-7.39544	-0.666109	0.0253	0.0290405	yes
XLOC_391605	XLOC_391605	NM_001127493,NM_001148,NM_020977	ANK2,ANK2,ANK2	ANK2	4:113739238-114304896	PRE	POST	OK	9.00397	0.0661791	-7.08804	-0.939851	0.0236	0.0270911	yes
XLOC_076516	XLOC_076516	NR_002832,NR_033312,NR_033313,NR_033314,NR_033315	BDNF-AS1,BDNF-AS1,BDNF-AS1,BDNF-AS1,BDNF-AS1	BDNF-AS1	11:27528398-27743674	PRE	POST	OK	90.5861	0.806706	-6.8111	-2.84882	0.0004	0.00121018	yes
XLOC_346109	XLOC_346109	NM_001134231,NM_022908	NT5DC2,NT5DC2	NT5DC2	3:52529355-52569093	PRE	POST	OK	29.2696	0.271255	-6.75361	-1.6641	0.0065	0.00748234	yes
XLOC_216308	XLOC_216308	NM_032854	CORO6	CORO6	17:27920526-27948441	PRE	POST	OK	13.5286	0.135779	-6.6386	-1.09181	0.02345	0.026919	yes
XLOC_048809	XLOC_048809	NM_014974	DIP2C	DIP2C	10:320129-735608	PRE	POST	OK	24.9596	0.352089	-6.14751	-1.98638	5e-05	0.00121018	yes
XLOC_249176	XLOC_249176	NM_001080401	PPM1N	PPM1N	19:46001730-46010098	PRE	POST	OK	1.87822	0.0367749	-5.6745	-0.310735	0.02825	0.032424	yes
XLOC_259439	XLOC_259439	NM_001201480,NM_001201481,NM_001201482,NM_032523,NM_145739	OSBPL6,OSBPL6,OSBPL6,OSBPL6,OSBPL6	OSBPL6	2:179059207-179914863	PRE	POST	OK	1.99192	0.0414974	-5.585	-0.159478	0.0347	0.0398178	yes
XLOC_597190	XLOC_597190	NM_001040712,NM_001171025,NM_002839,NM_130391,NM_130392,NM_130393	PTPRD,PTPRD,PTPRD,PTPRD,PTPRD,PTPRD	PTPRD	9:8314245-10612723	PRE	POST	OK	1.69462	0.0521527	-5.02207	-1.18798	0.0162	0.018603	yes
XLOC_259539	XLOC_259539	NM_001122633,NM_001122634,NM_001875	CPS1,CPS1,CPS1	CPS1	2:211342405-211543831	PRE	POST	OK	0.892904	0.0324873	-4.78056	-0.74021	0.03325	0.0381562	yes
XLOC_001142	XLOC_001142	NM_032890	DISP1	DISP1	1:222988377-223179337	PRE	POST	OK	225.88	8.34817	-4.75795	-2.92851	0.00065	0.00121018	yes
XLOC_346497	XLOC_346497	NM_080652	TMEM41A	TMEM41A	3:185000728-185216894	PRE	POST	OK	69.7663	3.18715	-4.45219	-4.70525	5e-05	0.00121018	yes
XLOC_076500	XLOC_076500	NM_001111018,NM_001111019,NM_001244963,NM_145117,NM_182964	NAV2,,NAV2,NAV2,NAV2	NAV2	11:19372270-20143147	PRE	POST	OK	1.0609	0.0775624	-3.77378	-1.04494	0.02045	0.0234773	yes
XLOC_106923	XLOC_106923	NM_001177948,NM_001177949,NM_153694	SYCP3,SYCP3,SYCP3	SYCP3	12:102091416-102133250	PRE	POST	OK	2.52793	0.210697	-3.58471	-0.77499	0.0357	0.0409639	yes
XLOC_249087	XLOC_249087	NM_001005851	ZNF780B	ZNF780B	19:40533792-40562129	PRE	POST	OK	25.3	2.31453	-3.45034	-3.33978	0.00015	0.00121018	yes
XLOC_258989	XLOC_258989	NM_199280	FAM179A	FAM179A	2:29204163-29275096	PRE	POST	OK	5.32825	0.553037	-3.26822	-1.09072	0.0343	0.0393594	yes
XLOC_260349	XLOC_260349	NM_002026,NM_054034,NM_212474,NM_212476,NM_212478,NM_212482	FN1,FN1,FN1,FN1,FN1,FN1	FN1	2:216225178-216300791	PRE	POST	OK	0.6127	0.0638782	-3.26179	-0.704503	0.00785	0.00902826	yes
XLOC_106098	XLOC_106098	NM_054104	OR6C3	OR6C3	12:55725484-55726420	PRE	POST	OK	1.46747	0.159561	-3.20115	-0.634454	0.0282	0.0323667	yes
XLOC_488394	XLOC_488394	NM_001270393,NM_001270394,NM_001270395,NM_032471,NM_181794,NM_181795	,,,PKIB,PKIB,PKIB	PKIB	6:122793061-123047518	PRE	POST	OK	3.70804	0.431933	-3.10178	-0.788298	0.0241	0.0276642	yes
XLOC_229620	XLOC_229620	NR_046174,NR_046454,NR_046455,NR_046456,NR_046457,NR_046458	LOC284260,LOC284260,LOC284260,LOC284260,LOC284260,LOC284260	LOC284260	18:39766632-40271389	PRE	POST	OK	1.18942	0.162235	-2.8741	-0.759962	0.01655	0.0190047	yes
XLOC_216047	XLOC_216047	NM_144999	LRRC45	LRRC45	17:79981276-79989027	PRE	POST	OK	8.03353	1.18439	-2.76189	-1.43913	0.01	0.0114904	yes
XLOC_488103	XLOC_488103	NM_001040437,NM_001040438	C6orf48,C6orf48	C6orf48	6:31802692-31807544	PRE	POST	OK	1024.36	158.544	-2.69176	-6.66588	5e-05	0.00121018	yes
XLOC_528758	XLOC_528758	NM_001040167,NM_001040168,NM_001166355,NM_002304	LFNG,LFNG,LFNG,LFNG	LFNG	7:2552162-2568810	PRE	POST	OK	63.1817	10.6643	-2.56672	-4.47457	5e-05	0.00121018	yes
XLOC_001339	XLOC_001339	NM_018948	ERRFI1	ERRFI1	1:8071778-8086393	PRE	POST	OK	0.878978	0.159877	-2.45886	-0.761773	0.0338	0.0387867	yes
XLOC_346561	XLOC_346561	NM_001145642,NM_014687	KIAA0226,KIAA0226	KIAA0226	3:197397141-197511317	PRE	POST	OK	14.889	2.93711	-2.34178	-2.09335	0.0003	0.00121018	yes
XLOC_391663	XLOC_391663	NM_172250	MMAA	MMAA	4:146539763-146581187	PRE	POST	OK	15.8953	3.20387	-2.31072	-2.0113	0.00015	0.00121018	yes
XLOC_000668	XLOC_000668	NM_001037675	NBPF9	NBPF9	1:144614954-144828810	PRE	POST	OK	15.8411	3.24697	-2.2865	-1.05426	0.0312	0.0358064	yes
XLOC_198821	XLOC_198821	NM_032940	POLR2C	POLR2C	16:57496550-57520385	PRE	POST	OK	52.0419	11.2894	-2.2047	-2.88525	0.0012	0.00173228	yes
XLOC_529396	XLOC_529396	NM_024963	FBXL18	FBXL18	7:5515427-5553399	PRE	POST	OK	1.94082	0.537838	-1.85142	-0.567277	0.04285	0.0491512	yes
XLOC_529132	XLOC_529132	NM_021930	RINT1	RINT1	7:105171944-105221976	PRE	POST	OK	19.6313	6.04864	-1.69847	-2.27272	5e-05	0.00121018	yes
XLOC_561635	XLOC_561635	NM_018941	CLN8	CLN8	8:1711869-1734736	PRE	POST	OK	1.86443	0.581138	-1.68178	-0.826268	0.01725	0.0198076	yes
XLOC_529920	XLOC_529920	NM_001042482,NM_022445	TPK1,TPK1	TPK1	7:144149033-144533150	PRE	POST	OK	20.8799	6.90643	-1.5961	-1.02482	0.02515	0.0288685	yes
XLOC_076730	XLOC_076730	NM_012094,NM_181651,NM_181652	PRDX5,PRDX5,PRDX5	PRDX5	11:64085559-64089295	PRE	POST	OK	45.2518	16.1249	-1.48868	-1.96988	0.0021	0.00267304	yes
XLOC_624444	XLOC_624444	NM_001005332,NM_001005333,NM_006986	MAGED1,MAGED1,MAGED1	MAGED1	X:51546115-51645456	PRE	POST	OK	55.256	20.0911	-1.45957	-1.50768	0.024	0.0275495	yes
XLOC_182507	XLOC_182507	NM_020857	VPS18	VPS18	15:41186608-41196173	PRE	POST	OK	7.53862	2.76414	-1.44747	-1.23751	0.00485	0.005631	yes
XLOC_391282	XLOC_391282	NM_020894	KIAA1530	KIAA1530	4:1340842-1382209	PRE	POST	OK	4.44843	1.9113	-1.21874	-0.791484	0.04305	0.0493799	yes
XLOC_441616	XLOC_441616	NM_001256574,NM_001256575,NM_001256576,NM_003633	ENC1,ENC1,ENC1,ENC1	ENC1	5:73923230-73937249	PRE	POST	OK	2.878	1.24186	-1.21256	-0.902661	0.0297	0.0340864	yes
XLOC_260172	XLOC_260172	NM_001009959,NM_020711	ERMN,ERMN	ERMN	2:158174259-158184871	PRE	POST	OK	2.83266	1.25726	-1.17188	-0.999598	0.0292	0.0335131	yes
XLOC_339497	XLOC_339497	NM_032758	PHF5A	PHF5A	22:41855571-41864708	PRE	POST	OK	46.6096	21.6066	-1.10915	-0.95874	0.04005	0.0459479	yes
XLOC_048370	XLOC_048370	NM_001267562,NM_001267563,NM_001267564,NM_001267565,NM_001267566,NM_001267567,NM_001267568,NM_001267569,NM_001267570,NM_001881,NM_181571,NM_182717,NM_182718,NM_182719,NM_182720,NM_182721,NM_182723,NM_182724,NM_182769,NM_182770,NM_182771,NM_182772,NM_183011,NM_183012,NM_183013,NM_183060	,,,,,,,,,CREM,CREM,CREM,CREM,CREM,CREM,CREM,CREM,CREM,CREM,CREM,CREM,CREM,CREM,CREM,CREM,CREM	CREM	10:35415768-35501994	PRE	POST	OK	39.9913	19.3295	-1.04888	-1.58387	0.00055	0.00121018	yes
XLOC_048519	XLOC_048519	NM_001099692	EIF5AL1	EIF5AL1	10:81272356-81276192	PRE	POST	OK	11.7625	5.91378	-0.992039	-1.33251	0.00125	0.00180058	yes
XLOC_330345	XLOC_330345	NM_001001992,NM_001032410,NM_006447	USP16,USP16,USP16	USP16	21:30396937-30426835	PRE	POST	OK	19.5584	10.0491	-0.960728	-0.642982	0.0246	0.0282377	yes
XLOC_048732	XLOC_048732	NM_139169	TRUB1	TRUB1	10:116697951-116737439	PRE	POST	OK	7.38078	3.79539	-0.959525	-1.09007	0.01035	0.0118924	yes
XLOC_229807	XLOC_229807	NM_001190821,NM_001190822,NM_001190823,NM_005904	SMAD7,SMAD7,SMAD7,SMAD7	SMAD7	18:46446222-46477081	PRE	POST	OK	17.9304	9.27207	-0.951448	-1.33172	0.003	0.00358952	yes
XLOC_441678	XLOC_441678	NM_012081	ELL2	ELL2	5:95220801-95297775	PRE	POST	OK	6.11855	3.19033	-0.939483	-1.20019	0.0089	0.0102298	yes
XLOC_339474	XLOC_339474	NM_014876	JOSD1	JOSD1	22:39077779-39098483	PRE	POST	OK	35.1522	18.3332	-0.939152	-1.38507	0.0011	0.00160523	yes
XLOC_489140	XLOC_489140	NM_006519	DYNLT1	DYNLT1	6:159057196-159065804	PRE	POST	OK	35.6648	18.7127	-0.930482	-1.26575	0.0039	0.00453333	yes
XLOC_106424	XLOC_106424	NM_015409	EP400	EP400	12:132434464-132565056	PRE	POST	OK	9.34611	4.96471	-0.912656	-0.821952	0.02055	0.023592	yes
XLOC_248041	XLOC_248041	NM_001025604,NM_015683	ARRDC2,ARRDC2	ARRDC2	19:18111943-18124963	PRE	POST	OK	21.2211	11.281	-0.911606	-1.38901	0.00105	0.00153585	yes
XLOC_259277	XLOC_259277	NM_172003	CBWD2	CBWD2	2:114195220-114253909	PRE	POST	OK	16.4818	8.84681	-0.897644	-0.917441	0.03125	0.0358635	yes
XLOC_216593	XLOC_216593	NM_012329	MMD	MMD	17:53469973-53499341	PRE	POST	OK	7.3194	3.93173	-0.896562	-0.907178	0.0369	0.0423397	yes
XLOC_345772	XLOC_345772	NM_001164436	TMEM212	TMEM212	3:171561138-171577108	PRE	POST	OK	8.63501	4.7257	-0.86967	-0.896064	0.01795	0.0206097	yes
XLOC_259595	XLOC_259595	NM_022915	MRPL44	MRPL44	2:224822120-224832431	PRE	POST	OK	9.96599	5.50963	-0.855057	-0.954541	0.0254	0.029155	yes
XLOC_441121	XLOC_441121	NM_000038,NM_001127510,NM_001127511	APC,APC,APC	APC	5:112043201-112181936	PRE	POST	OK	9.83294	5.4485	-0.851764	-0.580609	0.0312	0.0358064	yes
XLOC_317752	XLOC_317752	NM_017495,NM_183425	RBM38,RBM38	RBM38	20:55904830-55998278	PRE	POST	OK	84.504	47.0587	-0.844557	-1.55644	0.0002	0.00121018	yes
XLOC_391402	XLOC_391402	NM_016531	KLF3	KLF3	4:38614321-38703643	PRE	POST	OK	59.497	33.1376	-0.844349	-1.12429	0.01	0.0114904	yes
XLOC_077049	XLOC_077049	NM_001024956,NM_006918	SC5DL,SC5DL	SC5DL	11:121163370-121184119	PRE	POST	OK	2.52146	1.40894	-0.83965	-0.905488	0.0314	0.0360355	yes
XLOC_345145	XLOC_345145	NM_001114092,NM_015453	THUMPD3,THUMPD3	THUMPD3	3:9404337-9430206	PRE	POST	OK	15.5383	8.69918	-0.836881	-1.07458	0.03085	0.0354053	yes
XLOC_106249	XLOC_106249	NM_003095	SNRPF	SNRPF	12:96252708-96260238	PRE	POST	OK	52.0056	29.2229	-0.83157	-1.02814	0.01375	0.0157921	yes
XLOC_161107	XLOC_161107	NM_024884	L2HGDH	L2HGDH	14:50709151-50778947	PRE	POST	OK	6.70596	3.78038	-0.826915	-1.07468	0.01485	0.0170547	yes
XLOC_441003	XLOC_441003	NM_001242466,NM_181504,NM_181523,NM_181524	PIK3R1,PIK3R1,PIK3R1,PIK3R1	PIK3R1	5:67511583-67597652	PRE	POST	OK	96.6419	54.5238	-0.825762	-1.42619	0.00065	0.00121018	yes
XLOC_623585	XLOC_623585	NR_027436	LOC283788	LOC283788	GL000219.1:55862-99642	PRE	POST	OK	30.2333	17.1133	-0.821021	-0.893391	0.04085	0.0468634	yes
XLOC_596709	XLOC_596709	NM_001146694,NM_001146695,NM_001146696,NM_015061	KDM4C,KDM4C,KDM4C,KDM4C	KDM4C	9:6720862-7175648	PRE	POST	OK	20.3214	11.5497	-0.815148	-1.09265	0.019	0.0218142	yes
XLOC_135765	XLOC_135765	NR_027995	ANKRD20A9P	ANKRD20A9P	13:19408542-19446109	PRE	POST	OK	2.2177	1.26619	-0.808566	-1.14761	0.00985	0.0113182	yes
XLOC_000650	XLOC_000650	NM_017709	FAM46C	FAM46C	1:118148603-118171011	PRE	POST	OK	29.1051	16.7381	-0.798132	-1.40033	0.00075	0.00128521	yes
XLOC_345541	XLOC_345541	NM_017819	RG9MTD1	RG9MTD1	3:101280711-101285089	PRE	POST	OK	27.0397	15.6061	-0.792972	-1.20136	0.003	0.00358952	yes
XLOC_000463	XLOC_000463	NM_001199741,NM_001199742,NM_001924	GADD45A,GADD45A,GADD45A	GADD45A	1:68150823-68154073	PRE	POST	OK	29.6096	17.2044	-0.783284	-1.06779	0.0196	0.0225021	yes
XLOC_000564	XLOC_000564	NM_001400	S1PR1	S1PR1	1:101694411-101713049	PRE	POST	OK	91.9622	53.985	-0.768484	-1.33405	0.0014	0.00193621	yes
XLOC_216184	XLOC_216184	NM_002616	PER1	PER1	17:8040507-8059815	PRE	POST	OK	23.955	14.0756	-0.767132	-1.28401	0.00465	0.00540003	yes
XLOC_258982	XLOC_258982	NM_005253	FOSL2	FOSL2	2:28615410-28639693	PRE	POST	OK	11.5735	6.81817	-0.763363	-1.11588	0.0074	0.00851128	yes
XLOC_106590	XLOC_106590	NM_005691,NM_020297	ABCC9,ABCC9	ABCC9	12:21950323-22089628	PRE	POST	OK	19.2999	11.4021	-0.759293	-1.14672	0.0122	0.0140143	yes
XLOC_259792	XLOC_259792	NM_001137602,NM_015955	MEMO1,MEMO1	MEMO1	2:32092004-32235698	PRE	POST	OK	13.114	7.7749	-0.75421	-0.891337	0.04155	0.0476647	yes
XLOC_161065	XLOC_161065	NM_001243645,NM_021914,NM_138638	CFL2,CFL2,CFL2	CFL2	14:35179111-35184113	PRE	POST	OK	7.01079	4.16011	-0.752955	-0.842393	0.0423	0.0485216	yes
XLOC_488438	XLOC_488438	NM_001270507,NM_001270508,NM_006290	,,TNFAIP3	TNFAIP3	6:138144806-138206547	PRE	POST	OK	320.79	191.203	-0.746528	-0.957633	0.03365	0.0386147	yes
XLOC_000476	XLOC_000476	NM_004582	RABGGTB	RABGGTB	1:76251854-76261534	PRE	POST	OK	32.0421	19.1043	-0.746071	-0.86668	0.03475	0.039875	yes
XLOC_625113	XLOC_625113	NM_001000	RPL39	RPL39	X:118920468-118925606	PRE	POST	OK	6015.33	3589.65	-0.7448	-0.924354	0.0244	0.0280082	yes
XLOC_624826	XLOC_624826	NM_002641,NM_020473	PIGA,PIGA	PIGA	X:15337572-15353676	PRE	POST	OK	13.3231	8.0039	-0.73515	-0.972503	0.0203	0.0233053	yes
XLOC_048329	XLOC_048329	NM_178815	ARL5B	ARL5B	10:18948282-18968085	PRE	POST	OK	15.3902	9.28676	-0.728767	-1.13332	0.0078	0.00897081	yes
XLOC_624536	XLOC_624536	NM_014499,NM_198333	P2RY10,P2RY10	P2RY10	X:78200309-78219619	PRE	POST	OK	55.2918	33.4707	-0.724165	-1.17912	0.0066	0.00759732	yes
XLOC_624980	XLOC_624980	NM_001178032,NM_001178033,NM_001243804,NM_018684	ZC4H2,ZC4H2,ZC4H2,ZC4H2	ZC4H2	X:64135681-64255137	PRE	POST	OK	7.6446	4.63319	-0.722435	-0.889213	0.0391	0.0448591	yes
XLOC_000224	XLOC_000224	NR_033926	LOC644961	LOC644961	1:27648635-27662891	PRE	POST	OK	28.1413	17.094	-0.719199	-1.04954	0.0175	0.0200938	yes
XLOC_441188	XLOC_441188	NM_001135586,NM_152409	C5orf24,C5orf24	C5orf24	5:134181369-134195427	PRE	POST	OK	5.75547	3.49789	-0.718447	-0.927574	0.0252	0.0289259	yes
XLOC_182831	XLOC_182831	NR_027053	LOC646214	LOC646214	15:21932513-21940739	PRE	POST	OK	8.3077	5.04934	-0.718356	-1.0247	0.0166	0.019062	yes
XLOC_229568	XLOC_229568	NM_003799	RNMT	RNMT	18:13726665-13764558	PRE	POST	OK	19.4057	11.8053	-0.71705	-0.972598	0.0238	0.0273203	yes
XLOC_107013	XLOC_107013	NM_016399	TRIAP1	TRIAP1	12:120881763-120884215	PRE	POST	OK	20.7591	12.6441	-0.71528	-0.857336	0.03165	0.0363219	yes
XLOC_106873	XLOC_106873	NM_014167	CCDC59	CCDC59	12:82746082-82873016	PRE	POST	OK	39.8908	24.37	-0.710951	-1.03955	0.01175	0.0134976	yes
XLOC_106827	XLOC_106827	NM_032338	LLPH	LLPH	12:66516076-66525125	PRE	POST	OK	40.9083	25.0074	-0.710035	-1.11674	0.00795	0.00914316	yes
XLOC_076997	XLOC_076997	NM_016090	RBM7	RBM7	11:114262169-114281628	PRE	POST	OK	21.6344	13.2975	-0.702167	-1.0231	0.0188	0.0215848	yes
XLOC_160634	XLOC_160634	NM_144578	MAPK1IP1L	MAPK1IP1L	14:55517633-55537156	PRE	POST	OK	49.7618	30.7336	-0.695223	-1.35006	0.00135	0.0018818	yes
XLOC_529595	XLOC_529595	NM_016038	SBDS	SBDS	7:66452222-66460870	PRE	POST	OK	21.9591	13.7336	-0.677109	-0.984585	0.0167	0.0191768	yes
XLOC_259089	XLOC_259089	NM_020143	PNO1	PNO1	2:68384980-68403301	PRE	POST	OK	14.3365	9.01938	-0.66859	-0.888446	0.03445	0.0395312	yes
XLOC_346548	XLOC_346548	NM_015562	UBXN7	UBXN7	3:196074534-196159345	PRE	POST	OK	14.3328	9.0251	-0.667303	-1.06576	0.01025	0.0117776	yes
XLOC_260150	XLOC_260150	NM_001008540,NM_003467	CXCR4,CXCR4	CXCR4	2:136871918-136875725	PRE	POST	OK	325.647	206.471	-0.657369	-1.18612	0.003	0.00358952	yes
XLOC_625085	XLOC_625085	NM_001015881,NM_004089,NM_198057	TSC22D3,TSC22D3,TSC22D3	TSC22D3	X:106952319-107019017	PRE	POST	OK	225.136	143.356	-0.651197	-1.10759	0.00725	0.0083389	yes
XLOC_441774	XLOC_441774	NM_006805	HNRNPA0	HNRNPA0	5:137086694-137090039	PRE	POST	OK	60.874	38.9137	-0.645546	-1.11834	0.0085	0.00977375	yes
XLOC_000494	XLOC_000494	NM_025065	RPF1	RPF1	1:84944919-84972262	PRE	POST	OK	40.2016	25.7906	-0.640409	-0.996836	0.01655	0.0190047	yes
XLOC_346439	XLOC_346439	NR_003001	SCARNA7	SCARNA7	3:160212671-160283385	PRE	POST	OK	6080.75	3963.52	-0.617465	-0.950044	0.0284	0.0325959	yes
XLOC_260024	XLOC_260024	NM_005735	ACTR1B	ACTR1B	2:98272401-98282077	PRE	POST	OK	14.3567	9.36355	-0.616595	-0.890761	0.03765	0.0431986	yes
XLOC_488271	XLOC_488271	NM_003463	PTP4A1	PTP4A1	6:64281548-64294347	PRE	POST	OK	120.444	78.8683	-0.610847	-1.03168	0.0152	0.017456	yes
XLOC_002394	XLOC_002394	NM_002221	ITPKB	ITPKB	1:226819340-226927058	PRE	POST	OK	53.3164	34.9269	-0.61024	-0.894333	0.0324	0.0371818	yes
XLOC_001003	XLOC_001003	NM_002922	RGS1	RGS1	1:192544668-192550111	PRE	POST	OK	187.026	123.147	-0.60286	-1.02189	0.01535	0.017628	yes
XLOC_561904	XLOC_561904	NM_001161779,NM_001161780,NM_001161781,NM_018444	PDP1,PDP1,PDP1,PDP1	PDP1	8:94929082-94938298	PRE	POST	OK	28.6082	18.9869	-0.591425	-1.08932	0.00875	0.0100584	yes
XLOC_529669	XLOC_529669	NM_001040057,NM_152789	FAM133B,FAM133B	FAM133B	7:92189829-92219746	PRE	POST	OK	19.4933	12.9709	-0.587698	-0.898909	0.03125	0.0358635	yes
XLOC_135965	XLOC_135965	NM_004951	GPR183	GPR183	13:99848627-100058554	PRE	POST	OK	153.904	102.79	-0.582331	-0.864268	0.0374	0.0429124	yes
XLOC_529447	XLOC_529447	NM_019059	TOMM7	TOMM7	7:22852251-22862421	PRE	POST	OK	955.605	648.083	-0.560235	-1.02654	0.0099	0.0113756	yes
XLOC_345835	XLOC_345835	NM_001167671,NM_001167672,NM_005578	LPP,LPP,LPP	LPP	3:187868993-188608460	PRE	POST	OK	3.98055	2.70105	-0.559445	-0.920122	0.0282	0.0323667	yes
XLOC_076950	XLOC_076950	NM_001166,NM_001256163,NM_001256166	BIRC2,,	BIRC2	11:102217912-102249644	PRE	POST	OK	22.6254	15.3768	-0.557192	-0.947265	0.02145	0.0246243	yes
XLOC_330575	XLOC_330575	NM_001098402,NM_001098403,NM_020727	ZNF295,ZNF295,ZNF295	ZNF295	21:43406939-43430496	PRE	POST	OK	11.2527	7.65044	-0.556652	-0.977195	0.0198	0.0227316	yes
XLOC_529703	XLOC_529703	NM_032164	ZNF394	ZNF394	7:99090477-99098181	PRE	POST	OK	16.5591	11.2622	-0.556139	-0.88386	0.03195	0.0366659	yes
XLOC_160670	XLOC_160670	NM_001123329,NM_014950	ZBTB1,ZBTB1	ZBTB1	14:64948150-65000408	PRE	POST	OK	64.4853	44.0388	-0.550196	-0.895225	0.03815	0.0437716	yes
XLOC_260008	XLOC_260008	NM_004418	DUSP2	DUSP2	2:96806656-96811195	PRE	POST	OK	68.7737	47.1312	-0.545175	-0.901428	0.04055	0.0465203	yes
XLOC_441051	XLOC_441051	NM_152405	JMY	JMY	5:78531924-78623038	PRE	POST	OK	5.71808	3.93996	-0.537351	-0.850657	0.04135	0.0474357	yes
XLOC_247956	XLOC_247956	NM_153358	ZNF791	ZNF791	19:12721720-12742662	PRE	POST	OK	15.4686	10.6733	-0.535341	-0.840438	0.04185	0.0480076	yes
XLOC_001476	XLOC_001476	NM_015484,NM_207170	SYF2,SYF2	SYF2	1:25548766-25559013	PRE	POST	OK	49.8344	34.3919	-0.535073	-0.951478	0.02205	0.0253124	yes
XLOC_002073	XLOC_002073	NM_005920	MEF2D	MEF2D	1:156433518-156470635	PRE	POST	OK	11.0752	7.69184	-0.525929	-0.909873	0.03265	0.0374681	yes
XLOC_260171	XLOC_260171	NM_006186	NR4A2	NR4A2	2:157180718-157190989	PRE	POST	OK	58.7219	41.0914	-0.515062	-0.876305	0.04115	0.0472068	yes
XLOC_624400	XLOC_624400	NM_006743	RBM3	RBM3	X:48432740-48439553	PRE	POST	OK	66.3426	46.784	-0.503919	-0.937762	0.0192	0.0220438	yes
XLOC_391942	XLOC_391942	NM_001812	CENPC1	CENPC1	4:68337988-68411415	PRE	POST	OK	70.5957	49.918	-0.500019	-0.880152	0.0326	0.0374108	yes
XLOC_215997	XLOC_215997	NR_038108,NR_038109,NR_038110,NR_038111	LOC100507246,LOC100507246,LOC100507246,LOC100507246	LOC100507246	17:74553845-74561430	PRE	POST	OK	33.8559	23.9472	-0.49955	-0.871809	0.0344	0.0394739	yes
XLOC_488311	XLOC_488311	NM_006813	PNRC1	PNRC1	6:89790428-89798352	PRE	POST	OK	383.844	272.039	-0.496708	-0.914806	0.02945	0.0337997	yes
XLOC_161070	XLOC_161070	NM_020529	NFKBIA	NFKBIA	14:35870714-35874394	PRE	POST	OK	143.058	101.41	-0.496393	-0.941299	0.0253	0.0290405	yes
XLOC_199123	XLOC_199123	NM_001136472,NM_001136473,NM_004862	LITAF,LITAF,LITAF	LITAF	16:11638862-11681322	PRE	POST	OK	77.9149	55.349	-0.49334	-0.915632	0.02705	0.0310475	yes
XLOC_216715	XLOC_216715	NM_005324	H3F3B	H3F3B	17:73772514-73775860	PRE	POST	OK	378.128	269.489	-0.488651	-0.851678	0.0379	0.043485	yes
XLOC_229601	XLOC_229601	NM_017831	RNF125	RNF125	18:29598345-29653154	PRE	POST	OK	42.6817	30.5623	-0.481867	-0.850199	0.02805	0.0321946	yes
XLOC_229607	XLOC_229607	NM_001143826,NM_001143827,NM_001256420,NM_014268	MAPRE2,MAPRE2,MAPRE2,MAPRE2	MAPRE2	18:32556891-32723432	PRE	POST	OK	69.9632	50.2791	-0.47664	-0.888728	0.032	0.0367232	yes
XLOC_182543	XLOC_182543	NM_016396	CTDSPL2	CTDSPL2	15:44719341-44821212	PRE	POST	OK	22.9875	16.5389	-0.474988	-0.855686	0.03725	0.0427405	yes
XLOC_624330	XLOC_624330	NM_001415	EIF2S3	EIF2S3	X:24073064-24096927	PRE	POST	OK	151.889	109.999	-0.465529	-0.863243	0.0263	0.0301875	yes
XLOC_076480	XLOC_076480	NM_014267	C11orf58	C11orf58	11:16760147-16780371	PRE	POST	OK	56.7464	41.436	-0.453644	-0.886774	0.03155	0.0362073	yes
XLOC_248007	XLOC_248007	NM_001145160,NM_003290	TPM4,TPM4	TPM4	19:16178316-16213813	PRE	POST	OK	36.9732	50.5782	0.452037	0.845071	0.0403	0.0462342	yes
XLOC_488024	XLOC_488024	NM_003511	HIST1H2AL	HIST1H2AL	6:27833106-27833576	PRE	POST	OK	240.406	333.562	0.472484	0.87672	0.0383	0.0439433	yes
XLOC_000854	XLOC_000854	NM_001206567,NM_005531	IFI16,IFI16	IFI16	1:158978808-159024945	PRE	POST	OK	22.3713	31.2023	0.48	0.858362	0.03845	0.0441149	yes
XLOC_487998	XLOC_487998	NM_001197246,NM_001197247,NM_001197248,NM_001197249,NM_007047	BTN3A2,BTN3A2,BTN3A2,BTN3A2,BTN3A2	BTN3A2	6:26365397-26378548	PRE	POST	OK	15.7526	22.0255	0.483586	0.866122	0.0381	0.0437143	yes
XLOC_247971	XLOC_247971	NM_004907	IER2	IER2	19:13261281-13265718	PRE	POST	OK	55.3652	77.4963	0.485148	0.906164	0.02965	0.0340291	yes
XLOC_345641	XLOC_345641	NM_004637	RAB7A	RAB7A	3:128444978-128533641	PRE	POST	OK	197.737	279.244	0.497946	0.809574	0.0385	0.0441721	yes
XLOC_198915	XLOC_198915	NM_007285	GABARAPL2	GABARAPL2	16:75600248-75611779	PRE	POST	OK	72.9469	103.887	0.510099	0.878606	0.0331	0.0379843	yes
XLOC_258992	XLOC_258992	NM_030915	LBH	LBH	2:30454396-30482968	PRE	POST	OK	28.355	40.4058	0.510959	0.90241	0.0271	0.0311049	yes
XLOC_106952	XLOC_106952	NM_001206609,NM_003006	SELPLG,SELPLG	SELPLG	12:109011537-109027682	PRE	POST	OK	82.9886	120.357	0.536339	0.972062	0.02195	0.0251977	yes
XLOC_529329	XLOC_529329	NM_153236	GIMAP7	GIMAP7	7:150211944-150218161	PRE	POST	OK	148.904	216.749	0.541641	1.01048	0.0129	0.0148172	yes
XLOC_259499	XLOC_259499	NM_001257102,NM_002491	NDUFB3,NDUFB3	NDUFB3	2:201936461-201950473	PRE	POST	OK	86.7246	126.429	0.543814	0.914014	0.02565	0.0294419	yes
XLOC_106337	XLOC_106337	NM_006187	OAS3	OAS3	12:113376248-113411054	PRE	POST	OK	4.18657	6.11473	0.54652	0.840264	0.03885	0.0445728	yes
XLOC_624655	XLOC_624655	NM_018990	SASH3	SASH3	X:128912517-128930909	PRE	POST	OK	9.78467	14.3163	0.549063	0.858432	0.03835	0.0440003	yes
XLOC_247981	XLOC_247981	NM_004843	IL27RA	IL27RA	19:14142551-14164025	PRE	POST	OK	11.6466	17.2107	0.563395	0.950347	0.02135	0.0245097	yes
XLOC_001914	XLOC_001914	NM_001002810,NM_001002811,NM_001002812,NM_001195260,NM_001195261,NM_001198832,NM_001198834,NM_014644,NM_022359	PDE4DIP,PDE4DIP,PDE4DIP,PDE4DIP,PDE4DIP,PDE4DIP,PDE4DIP,PDE4DIP,PDE4DIP	PDE4DIP	1:144851423-145076186	PRE	POST	OK	12.6834	19.0097	0.583791	0.938016	0.02365	0.0271482	yes
XLOC_000786	XLOC_000786	NM_023015	INTS3	INTS3	1:153700534-153747254	PRE	POST	OK	4.24424	6.36843	0.585432	0.899385	0.03205	0.0367805	yes
XLOC_597034	XLOC_597034	NM_001130438,NM_001195532,NM_003127	SPTAN1,SPTAN1,SPTAN1	SPTAN1	9:131314836-131419129	PRE	POST	OK	23.1511	34.7899	0.587586	0.866841	0.0379	0.043485	yes
XLOC_182686	XLOC_182686	NM_001127190,NM_004383	CSK,CSK	CSK	15:75074424-75095539	PRE	POST	OK	10.0508	15.182	0.595063	0.913302	0.02985	0.0342584	yes
XLOC_002123	XLOC_002123	NM_001184714,NM_001184715,NM_001184716,NM_052931	SLAMF6,SLAMF6,SLAMF6,SLAMF6	SLAMF6	1:160454526-160493052	PRE	POST	OK	27.48	41.6233	0.599011	1.04582	0.0132	0.0151612	yes
XLOC_215965	XLOC_215965	NM_004252	SLC9A3R1	SLC9A3R1	17:72744750-72765499	PRE	POST	OK	41.1367	62.804	0.610432	1.13336	0.00795	0.00914316	yes
XLOC_561981	XLOC_561981	NM_002467	MYC	MYC	8:128748314-128753680	PRE	POST	OK	42.1365	64.4226	0.612498	1.14777	0.0054	0.0062277	yes
XLOC_135742	XLOC_135742	NM_001267728,NM_005537,NM_198217,NM_198218,NM_198219	,ING1,ING1,ING1,ING1	ING1	13:111364969-111373421	PRE	POST	OK	10.1356	15.7395	0.634955	1.00128	0.0223	0.0255993	yes
XLOC_339167	XLOC_339167	NM_002305	LGALS1	LGALS1	22:38071612-38075809	PRE	POST	OK	141.876	221.296	0.641343	0.962478	0.0139	0.0159643	yes
XLOC_248939	XLOC_248939	NM_001145304,NM_001145305,NM_025249	KIAA1683,KIAA1683,KIAA1683	KIAA1683	19:18367905-18387107	PRE	POST	OK	3.48948	5.44545	0.64204	1.05489	0.0092	0.0105741	yes
XLOC_346389	XLOC_346389	NM_013308	GPR171	GPR171	3:150804675-151176497	PRE	POST	OK	59.0121	92.8937	0.65457	1.14727	0.0069	0.00794089	yes
XLOC_488769	XLOC_488769	NM_001141969,NM_001141970,NM_001254717,NM_001350	DAXX,DAXX,DAXX,DAXX	DAXX	6:33286333-33290793	PRE	POST	OK	6.34766	10.0376	0.661114	0.967962	0.0225	0.0258288	yes
XLOC_330409	XLOC_330409	NM_001144925,NM_001178046,NM_002462	MX1,MX1,MX1	MX1	21:42792519-42831141	PRE	POST	OK	8.43228	13.5357	0.68277	1.04728	0.01525	0.0175133	yes
XLOC_076719	XLOC_076719	NM_006819	STIP1	STIP1	11:63953586-63972020	PRE	POST	OK	5.36057	8.61873	0.685089	0.98433	0.0129	0.0148172	yes
XLOC_597247	XLOC_597247	NM_014314	DDX58	DDX58	9:32455299-32526322	PRE	POST	OK	7.952	12.9108	0.699193	1.05241	0.00945	0.0108591	yes
XLOC_048693	XLOC_048693	NM_001083913,NM_017787	C10orf26,C10orf26	C10orf26	10:104503726-104576021	PRE	POST	OK	3.5304	5.82294	0.721917	1.00587	0.01445	0.0165955	yes
XLOC_001988	XLOC_001988	NM_005620	S100A11	S100A11	1:152004981-152009511	PRE	POST	OK	217.698	365.221	0.746446	1.42046	0.0007	0.00121018	yes
XLOC_215452	XLOC_215452	NM_017523,NM_199139	XAF1,XAF1	XAF1	17:6659155-6678968	PRE	POST	OK	28.0059	47.1482	0.751475	1.19412	0.00675	0.00776986	yes
XLOC_597286	XLOC_597286	NM_014450	SIT1	SIT1	9:35649296-35650947	PRE	POST	OK	17.3402	29.3329	0.758396	1.15188	0.00425	0.00493833	yes
XLOC_000009	XLOC_000009	NM_005101	ISG15	ISG15	1:948846-949919	PRE	POST	OK	52.1437	89.2952	0.776089	1.22403	0.0031	0.00367078	yes
XLOC_182724	XLOC_182724	NM_001242911,NM_001242912,NM_001242913,NM_001242914,NM_001242915,NM_001242916,NM_001242917,NM_001242918,NM_001242919,NM_019006	ZFAND6,ZFAND6,ZFAND6,ZFAND6,ZFAND6,ZFAND6,ZFAND6,ZFAND6,ZFAND6,ZFAND6	ZFAND6	15:80351909-80430804	PRE	POST	OK	13.5205	23.4874	0.79674	1.08797	0.0139	0.0159643	yes
XLOC_135846	XLOC_135846	NM_005830	MRPS31	MRPS31	13:41303431-41345347	PRE	POST	OK	13.7307	23.8861	0.798764	0.877915	0.0413	0.0473784	yes
XLOC_529012	XLOC_529012	NM_198467	RSBN1L	RSBN1L	7:77313167-77410319	PRE	POST	OK	6.65744	11.5833	0.799005	0.936616	0.021	0.0241083	yes
XLOC_597673	XLOC_597673	NM_015392	NPDC1	NPDC1	9:139933908-139940676	PRE	POST	OK	5.90461	10.3371	0.807913	0.972161	0.01745	0.0200365	yes
XLOC_345585	XLOC_345585	NM_173799	TIGIT	TIGIT	3:114012832-114029153	PRE	POST	OK	5.18677	9.24031	0.833105	1.05475	0.0153	0.0175707	yes
XLOC_199115	XLOC_199115	NM_014015	DEXI	DEXI	16:11022747-11036257	PRE	POST	OK	5.27955	9.46068	0.841529	0.856849	0.0409	0.0469206	yes
XLOC_001320	XLOC_001320	NM_020710	LRRC47	LRRC47	1:3696783-3713068	PRE	POST	OK	3.75904	6.81314	0.857956	1.01792	0.00935	0.0107456	yes
XLOC_001772	XLOC_001772	NM_002053	GBP1	GBP1	1:89517986-89531043	PRE	POST	OK	13.6539	24.7982	0.860922	1.50072	0.00025	0.00121018	yes
XLOC_441677	XLOC_441677	NM_001118890,NM_001243658,NM_001243659,NM_002064	GLRX,GLRX,GLRX,GLRX	GLRX	5:95149552-95158577	PRE	POST	OK	90.7997	166.762	0.877029	1.47471	0.0002	0.00121018	yes
XLOC_346466	XLOC_346466	NM_001190942,NM_001190943,NM_003810	TNFSF10,TNFSF10,TNFSF10	TNFSF10	3:172223297-172241297	PRE	POST	OK	23.4777	44.0578	0.90811	1.59409	0.00015	0.00121018	yes
XLOC_049178	XLOC_049178	NM_015916	CALHM2	CALHM2	10:105206539-105212162	PRE	POST	OK	5.77606	11.1157	0.944443	1.02264	0.01165	0.0133828	yes
XLOC_345977	XLOC_345977	NM_001171171,NM_001171172,NM_001171174,NM_001337	CX3CR1,CX3CR1,CX3CR1,CX3CR1	CX3CR1	3:39304237-39323226	PRE	POST	OK	16.0678	31.301	0.962035	1.15655	0.00335	0.00391409	yes
XLOC_106114	XLOC_106114	NM_001798,NM_052827	CDK2,CDK2	CDK2	12:56360555-56366568	PRE	POST	OK	2.9068	5.73473	0.980292	0.851377	0.0433	0.0496654	yes
XLOC_529330	XLOC_529330	NM_018326	GIMAP4	GIMAP4	7:150264358-150271088	PRE	POST	OK	72.8966	145.136	0.993478	1.78985	5e-05	0.00121018	yes
XLOC_000940	XLOC_000940	NM_001007239,NM_014955,NM_015935	METTL13,METTL13,METTL13	METTL13	1:171750760-171766856	PRE	POST	OK	1.41598	3.08469	1.12332	0.946841	0.0291	0.0333984	yes
XLOC_346087	XLOC_346087	NM_013324,NM_145071	CISH,CISH	CISH	3:50643874-50649262	PRE	POST	OK	3.76778	8.21556	1.12464	1.24352	0.00355	0.0041413	yes
XLOC_199015	XLOC_199015	NM_022493	NARFL	NARFL	16:779761-790997	PRE	POST	OK	1.51928	3.31538	1.12579	0.873066	0.0386	0.0442865	yes
XLOC_248980	XLOC_248980	NR_045525	ZNF724P	ZNF724P	19:23404925-23433186	PRE	POST	OK	2.51705	5.60849	1.15588	0.83229	0.0355	0.0407345	yes
XLOC_488188	XLOC_488188	NM_002505,NM_021705	NFYA,NFYA	NFYA	6:41040431-41108573	PRE	POST	OK	3.99596	9.11574	1.18982	1.3834	0.0141	0.0161937	yes
XLOC_441777	XLOC_441777	NM_001164326,NM_006696,NM_139199	BRD8,BRD8,BRD8	BRD8	5:137475322-137514368	PRE	POST	OK	6.90745	15.9861	1.21059	0.911314	0.03415	0.0391875	yes
XLOC_001949	XLOC_001949	NR_036461	HIST2H2BC	HIST2H2BC	1:149820236-149823161	PRE	POST	OK	23.0521	53.5412	1.21575	1.27525	0.0056	0.00645697	yes
XLOC_106364	XLOC_106364	NM_001037494,NM_001037495,NM_003746	DYNLL1,DYNLL1,DYNLL1	DYNLL1	12:120907659-120936298	PRE	POST	OK	13.9919	34.3649	1.29635	1.55005	0.00055	0.00121018	yes
XLOC_106336	XLOC_106336	NM_001032409,NM_002534,NM_016816	OAS1,OAS1,OAS1	OAS1	12:113344738-113369705	PRE	POST	OK	4.83329	11.8907	1.29875	1.055	0.01595	0.0183168	yes
XLOC_215656	XLOC_215656	NM_002311,NM_013975	LIG3,LIG3	LIG3	17:33307200-33333893	PRE	POST	OK	4.94944	13.7044	1.4693	1.49764	0.00765	0.00879859	yes
XLOC_001462	XLOC_001462	NM_004091	E2F2	E2F2	1:23832919-23857712	PRE	POST	OK	0.470471	1.34367	1.514	1.05231	0.01755	0.0201512	yes
XLOC_161219	XLOC_161219	NM_001043318,NM_194278	C14orf43,C14orf43	C14orf43	14:74181804-74253996	PRE	POST	OK	7.41391	21.2798	1.52118	2.09815	0.00025	0.00121018	yes
XLOC_000487	XLOC_000487	NM_006820	IFI44L	IFI44L	1:79086087-79112055	PRE	POST	OK	4.40484	13.4527	1.61073	1.8777	5e-05	0.00121018	yes
XLOC_441205	XLOC_441205	NM_001964	EGR1	EGR1	5:137801180-137805004	PRE	POST	OK	8.24897	29.541	1.84043	2.73374	5e-05	0.00121018	yes
XLOC_345845	XLOC_345845	NM_174908,NM_178335	CCDC50,CCDC50	CCDC50	3:190984943-191116459	PRE	POST	OK	2.07915	7.87323	1.92096	1.89118	0.00325	0.00379743	yes
XLOC_624334	XLOC_624334	NM_016937	POLA1	POLA1	X:24712051-25015102	PRE	POST	OK	1.27499	5.14044	2.0114	1.56151	0.00145	0.00193621	yes
XLOC_488860	XLOC_488860	NM_021572	ENPP5	ENPP5	6:46127761-46138717	PRE	POST	OK	2.51307	10.9032	2.11723	0.992198	0.02025	0.0232479	yes
XLOC_441296	XLOC_441296	NM_001145805	IRGM	IRGM	5:150226084-150259335	PRE	POST	OK	0.949189	4.25237	2.1635	1.23103	0.03535	0.0405624	yes
XLOC_106685	XLOC_106685	NM_001012300,NM_006337	MCRS1,MCRS1	MCRS1	12:49932939-49961922	PRE	POST	OK	5.32576	23.9451	2.16867	3.03265	5e-05	0.00121018	yes
XLOC_392063	XLOC_392063	NM_001813	CENPE	CENPE	4:104026962-104119566	PRE	POST	OK	0.357596	1.61992	2.17952	0.95222	0.0064	0.00736849	yes
XLOC_215981	XLOC_215981	NM_001015002,NM_001031803,NM_004524	LLGL2,LLGL2,LLGL2	LLGL2	17:73521782-73571290	PRE	POST	OK	2.00575	9.68528	2.27165	1.6705	0.01695	0.0194636	yes
XLOC_002429	XLOC_002429	NM_020808	SIPA1L2	SIPA1L2	1:232533711-232669288	PRE	POST	OK	0.772482	5.22256	2.75718	1.63599	0.00535	0.00617109	yes
XLOC_488099	XLOC_488099	NM_005345	HSPA1A	HSPA1A	6:31783290-31785719	PRE	POST	OK	0.626059	5.48035	3.1299	2.03152	5e-05	0.00121018	yes
XLOC_106563	XLOC_106563	NM_006143	GPR19	GPR19	12:12813929-12852959	PRE	POST	OK	0.433043	3.79517	3.13158	1.18386	0.0247	0.0283523	yes
XLOC_488102	XLOC_488102	NM_005346	HSPA1B	HSPA1B	6:31795511-31798031	PRE	POST	OK	0.793666	7.37447	3.21594	2.07563	5e-05	0.00121018	yes
XLOC_339417	XLOC_339417	NM_014338	PISD	PISD	22:31891697-32058494	PRE	POST	OK	4.05262	42.0081	3.37374	1.96205	0.0127	0.0145877	yes
XLOC_077174	XLOC_077174	NM_003141	TRIM21	TRIM21	11:4406126-4414926	PRE	POST	OK	3.50919	53.1609	3.92116	4.28223	5e-05	0.00121018	yes
XLOC_000184	XLOC_000184	NM_007260	LYPLA2	LYPLA2	1:24117645-24122029	PRE	POST	OK	5.77022	93.7387	4.02195	5.36236	5e-05	0.00121018	yes
XLOC_105982	XLOC_105982	NR_040245	LOC100287314	LOC100287314	12:30948614-30955645	PRE	POST	OK	0.181634	3.5301	4.28061	1.01217	0.03225	0.0370099	yes
XLOC_624320	XLOC_624320	NM_000444	PHEX	PHEX	X:22050920-22266768	PRE	POST	OK	0.65694	16.2565	4.62911	2.60527	0.03495	0.0401041	yes
XLOC_002283	XLOC_002283	NM_001136504,NM_177402	SYT2,SYT2	SYT2	1:202559724-202679551	PRE	POST	OK	0.125102	5.28727	5.40135	1.02859	0.03415	0.0391875	yes
XLOC_392114	XLOC_392114	NM_007083,NM_198041	NUDT6,NUDT6	NUDT6	4:123747862-123844159	PRE	POST	OK	0.752385	35.0119	5.54023	2.18739	0.0055	0.00634172	yes
XLOC_596690	XLOC_596690	NM_004170	SLC1A1	SLC1A1	9:4490426-4587469	PRE	POST	OK	0.0595736	2.90373	5.60709	0.715523	0.0279	0.0320226	yes
XLOC_229622	XLOC_229622	NM_001242692,NM_007163	SLC14A2,SLC14A2	SLC14A2	18:42792946-43263060	PRE	POST	OK	0.153304	8.94975	5.86738	1.47204	0.0069	0.00794089	yes
XLOC_597147	XLOC_597147	NM_001145527,NM_024757	EHMT1,EHMT1	EHMT1	9:140513423-140730578	PRE	POST	OK	13.0196	875.771	6.0718	12.8385	5e-05	0.00121018	yes
XLOC_001788	XLOC_001788	NM_001261408,NM_001261409,NM_001261410,NM_003567	,,,BCAR3	BCAR3	1:94027342-94312706	PRE	POST	OK	0.0695768	7.33103	6.71927	0.77863	0.0011	0.00160523	yes
XLOC_440880	XLOC_440880	NM_052909	PLEKHG4B	PLEKHG4B	5:140372-190087	PRE	POST	OK	0.033382	3.97346	6.89518	0.596798	0.02505	0.0287539	yes
XLOC_106585	XLOC_106585	NM_021094,NM_134431	SLCO1A2,SLCO1A2	SLCO1A2	12:21417533-21548371	PRE	POST	OK	0.175975	54.2247	8.26744	1.69176	0.0333	0.0382135	yes
XLOC_488706	XLOC_488706	NM_001173531,NM_002701,NM_203289	POU5F1,POU5F1,POU5F1	POU5F1	6:31132113-31138451	PRE	POST	OK	0.689622	864.572	10.292	3.70653	0.0074	0.00851128	yes
